# Supplementary material
Source: ML conference proceedings conference paper supplement (https://openreview.net/forum?id=dwNXKkiP51)

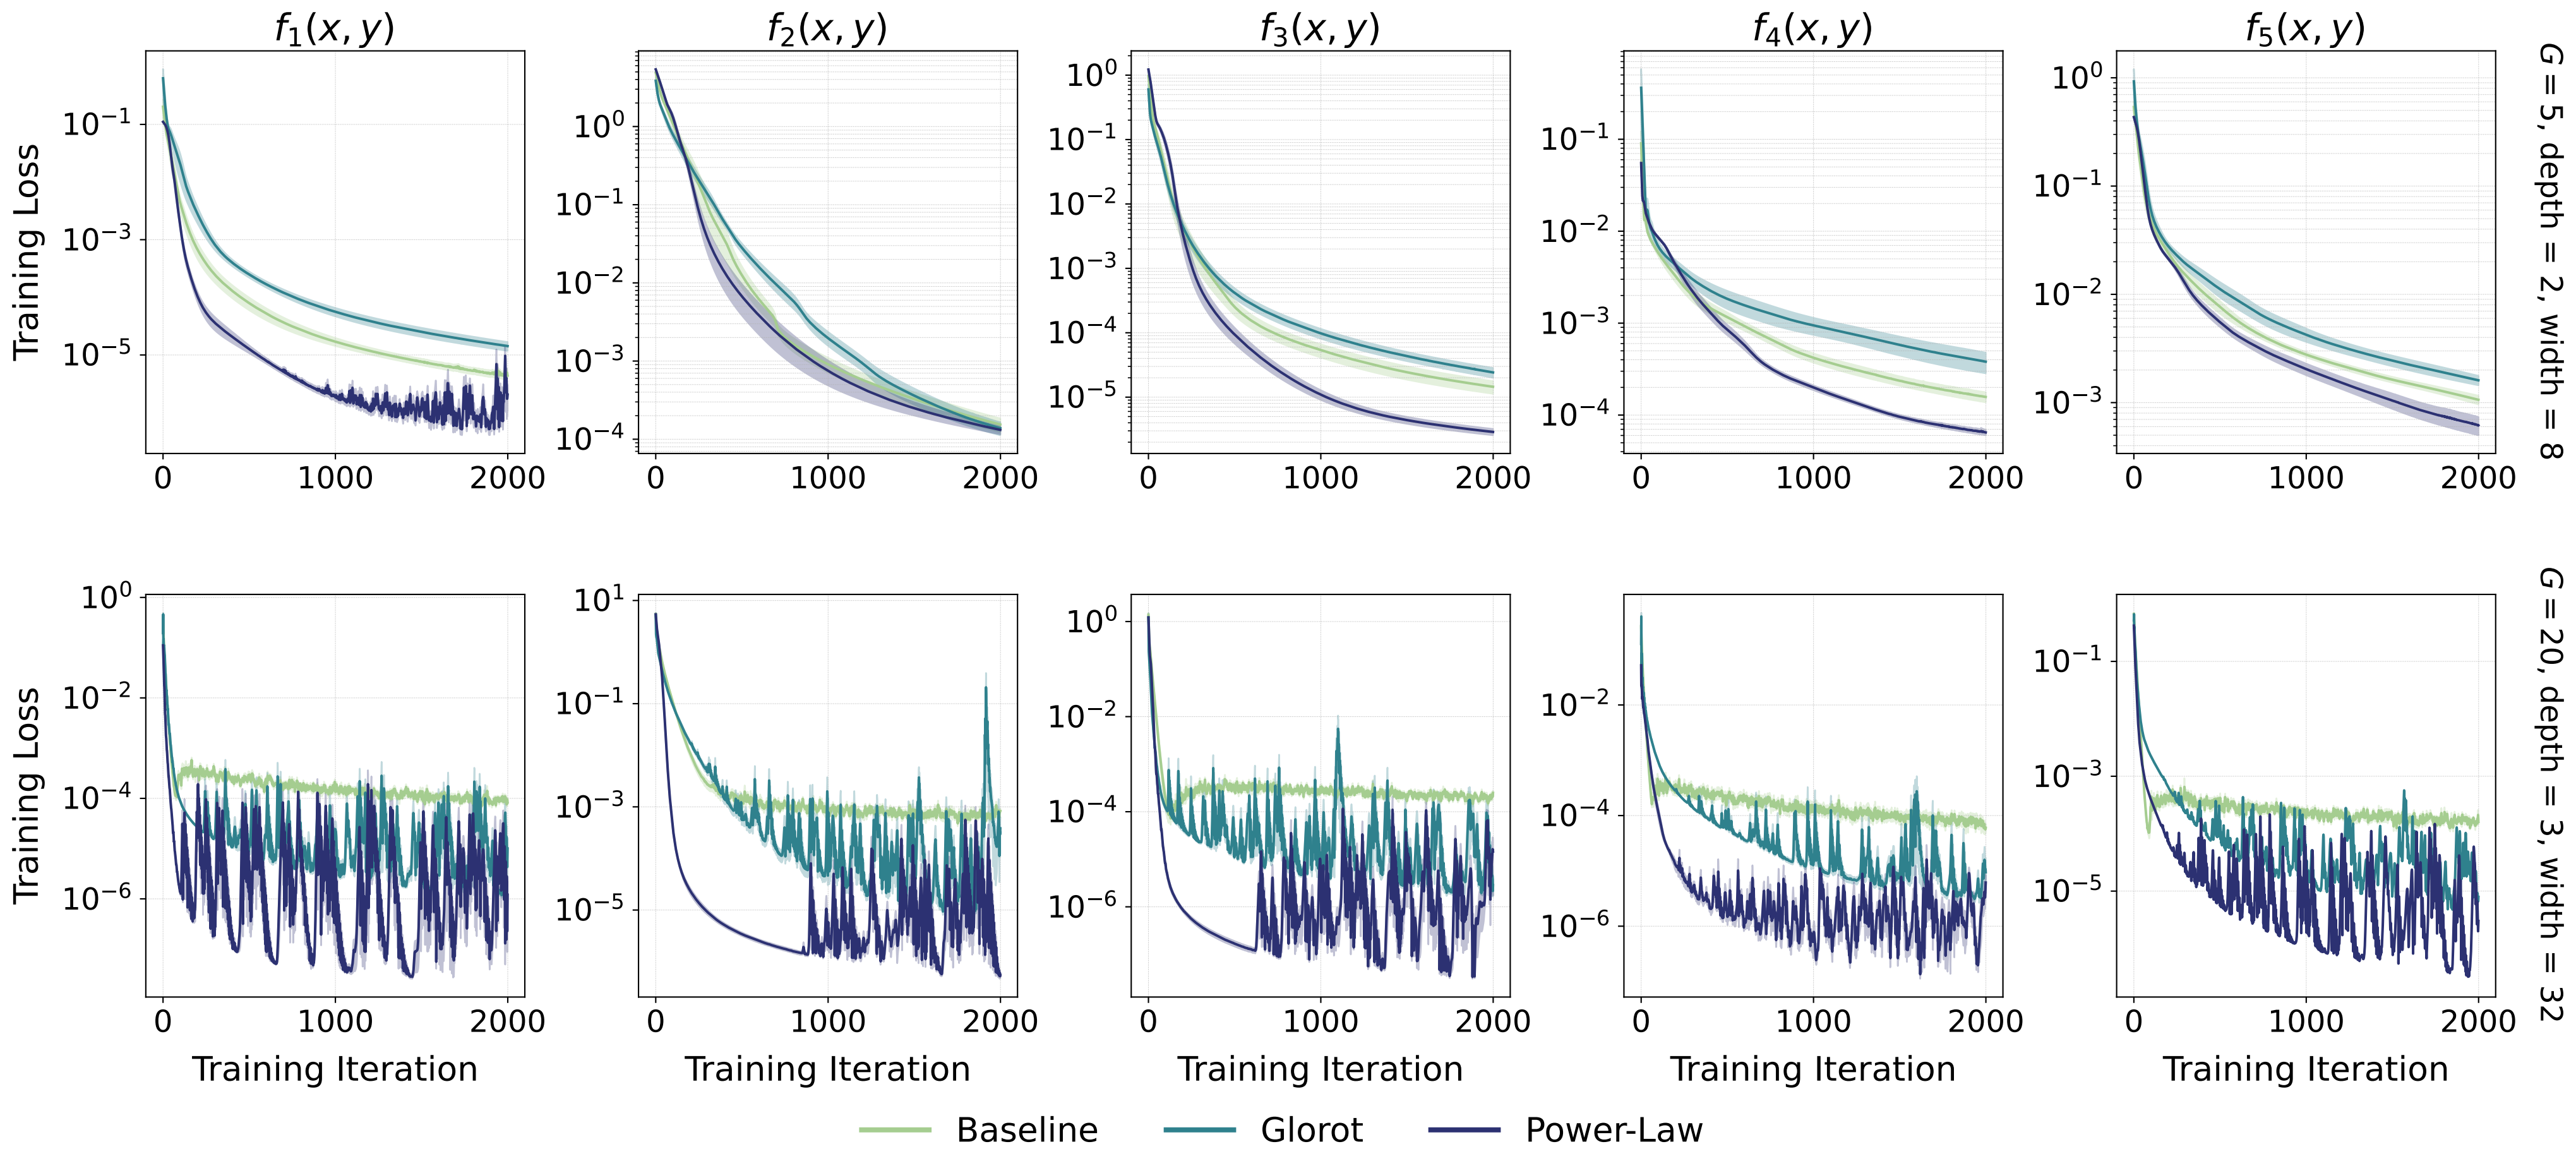

Supplement: supplementary_material [file ff_losses.pdf › main_plots/ff_losses.pdf]

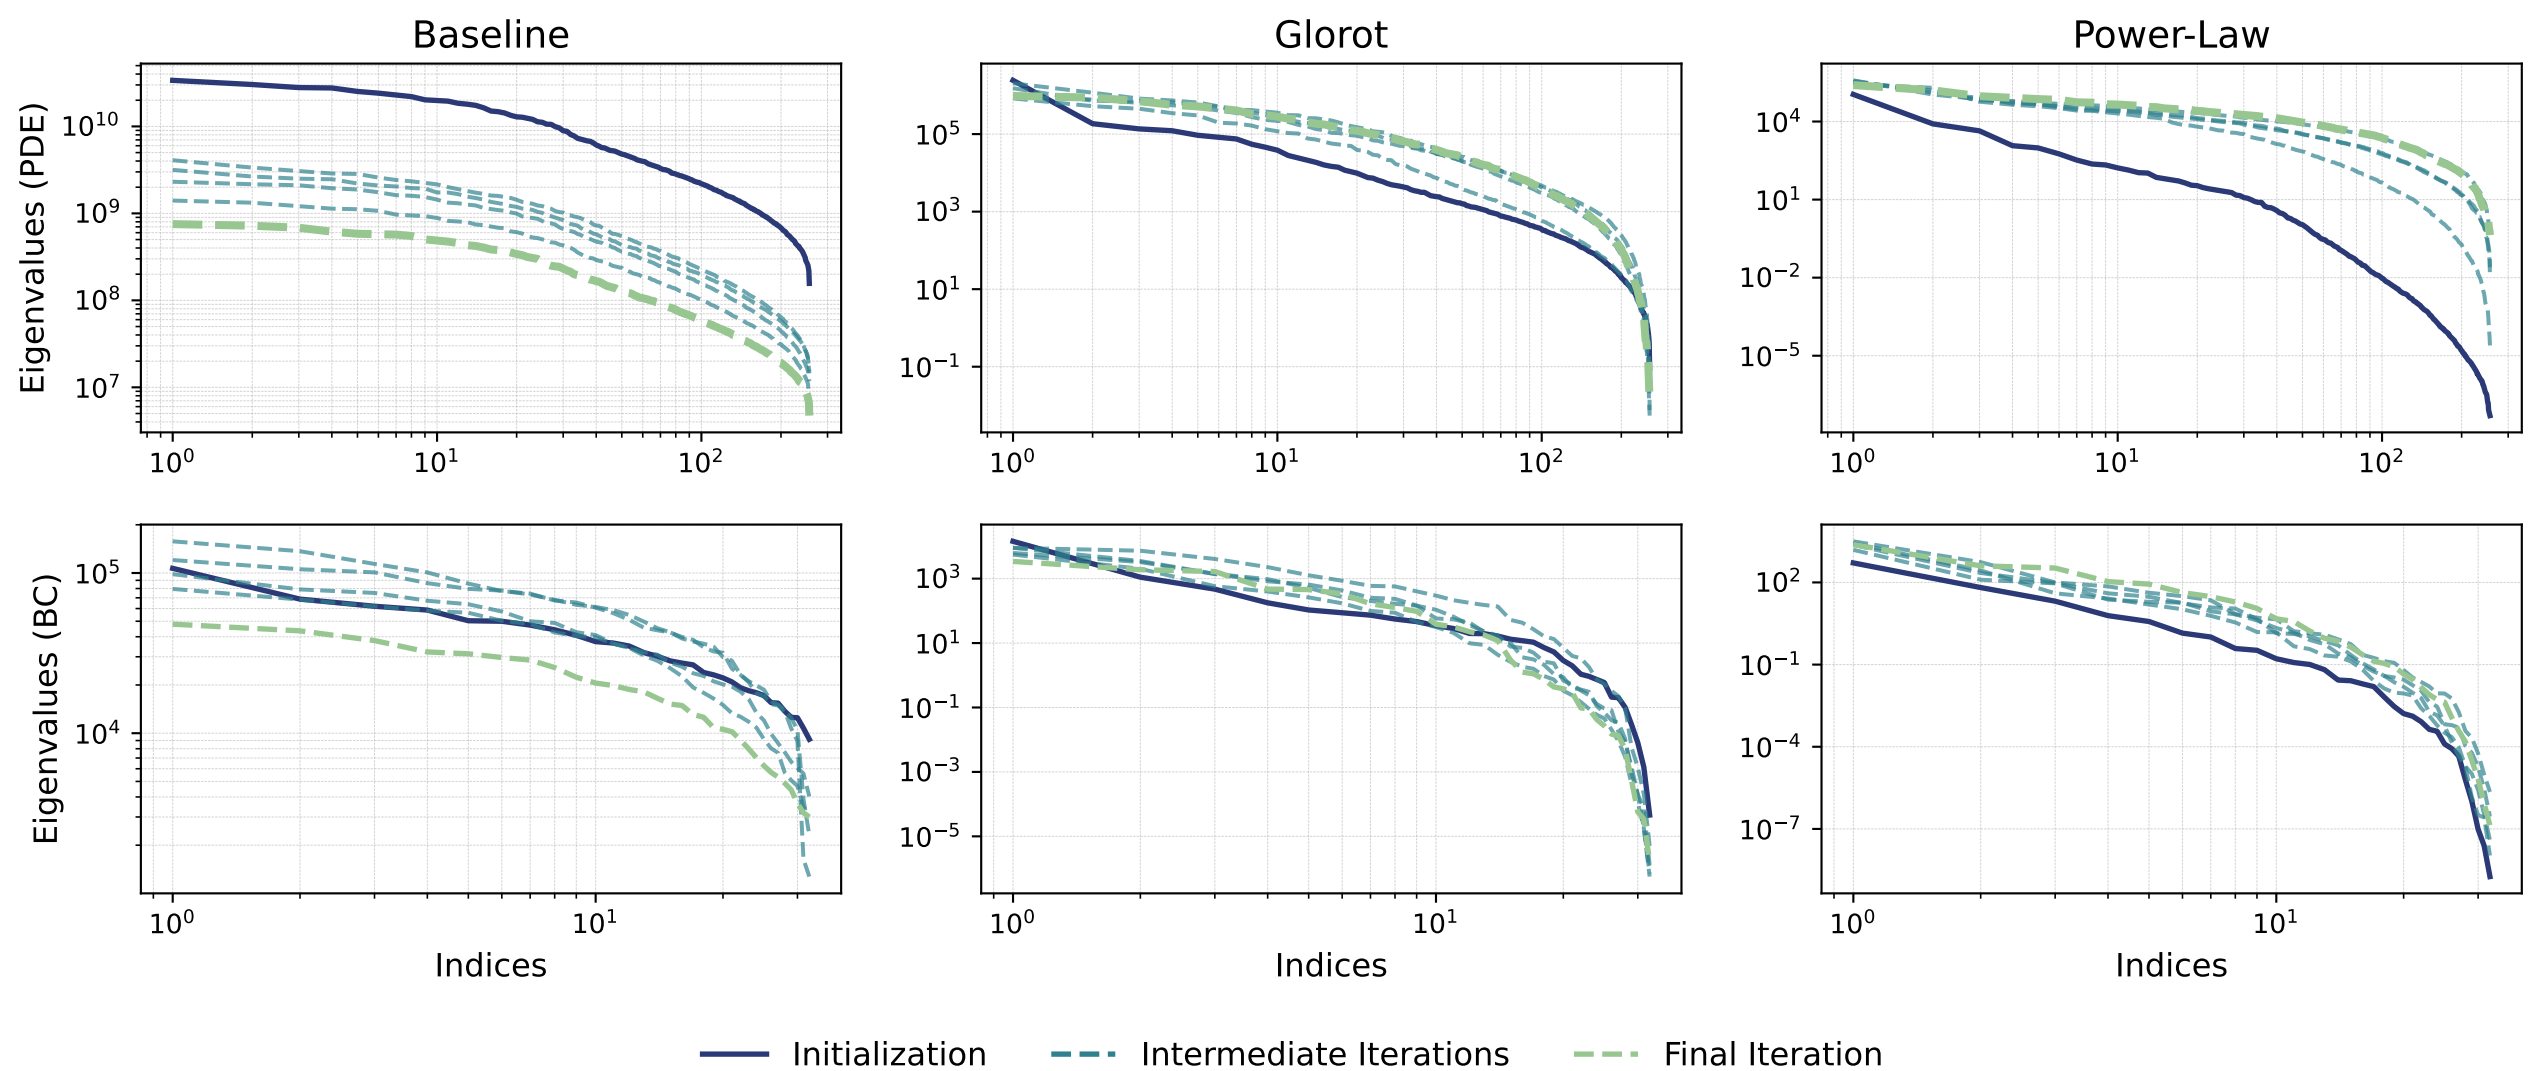

Supplement: supplementary_material [file ntk_allen-cahn.pdf › main_plots/ntk_allen-cahn.pdf]

Baseline

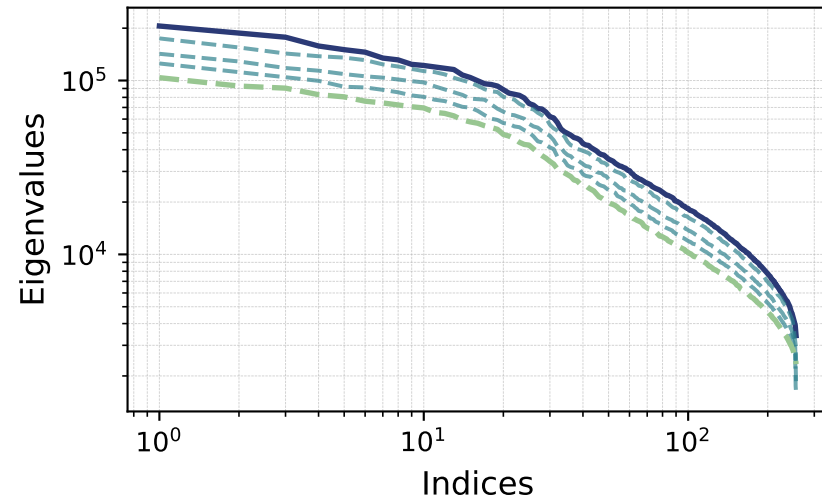

Glorot

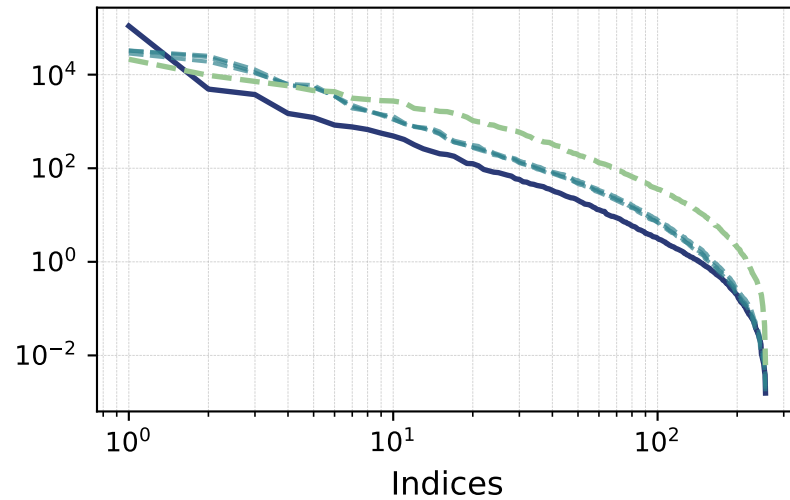

Power-Law

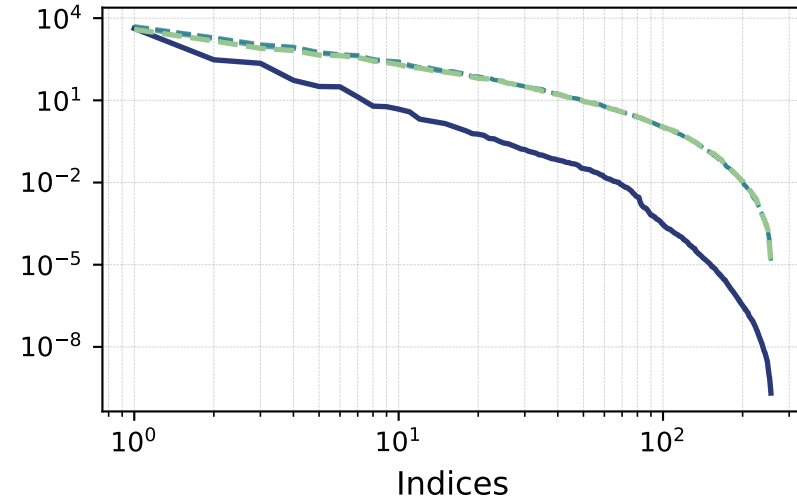

— Initialization    - - - Intermediate Iterations    - - - Final Iteration

Supplement: supplementary_material [file ntk_f3.pdf › main_plots/ntk_f3.pdf]

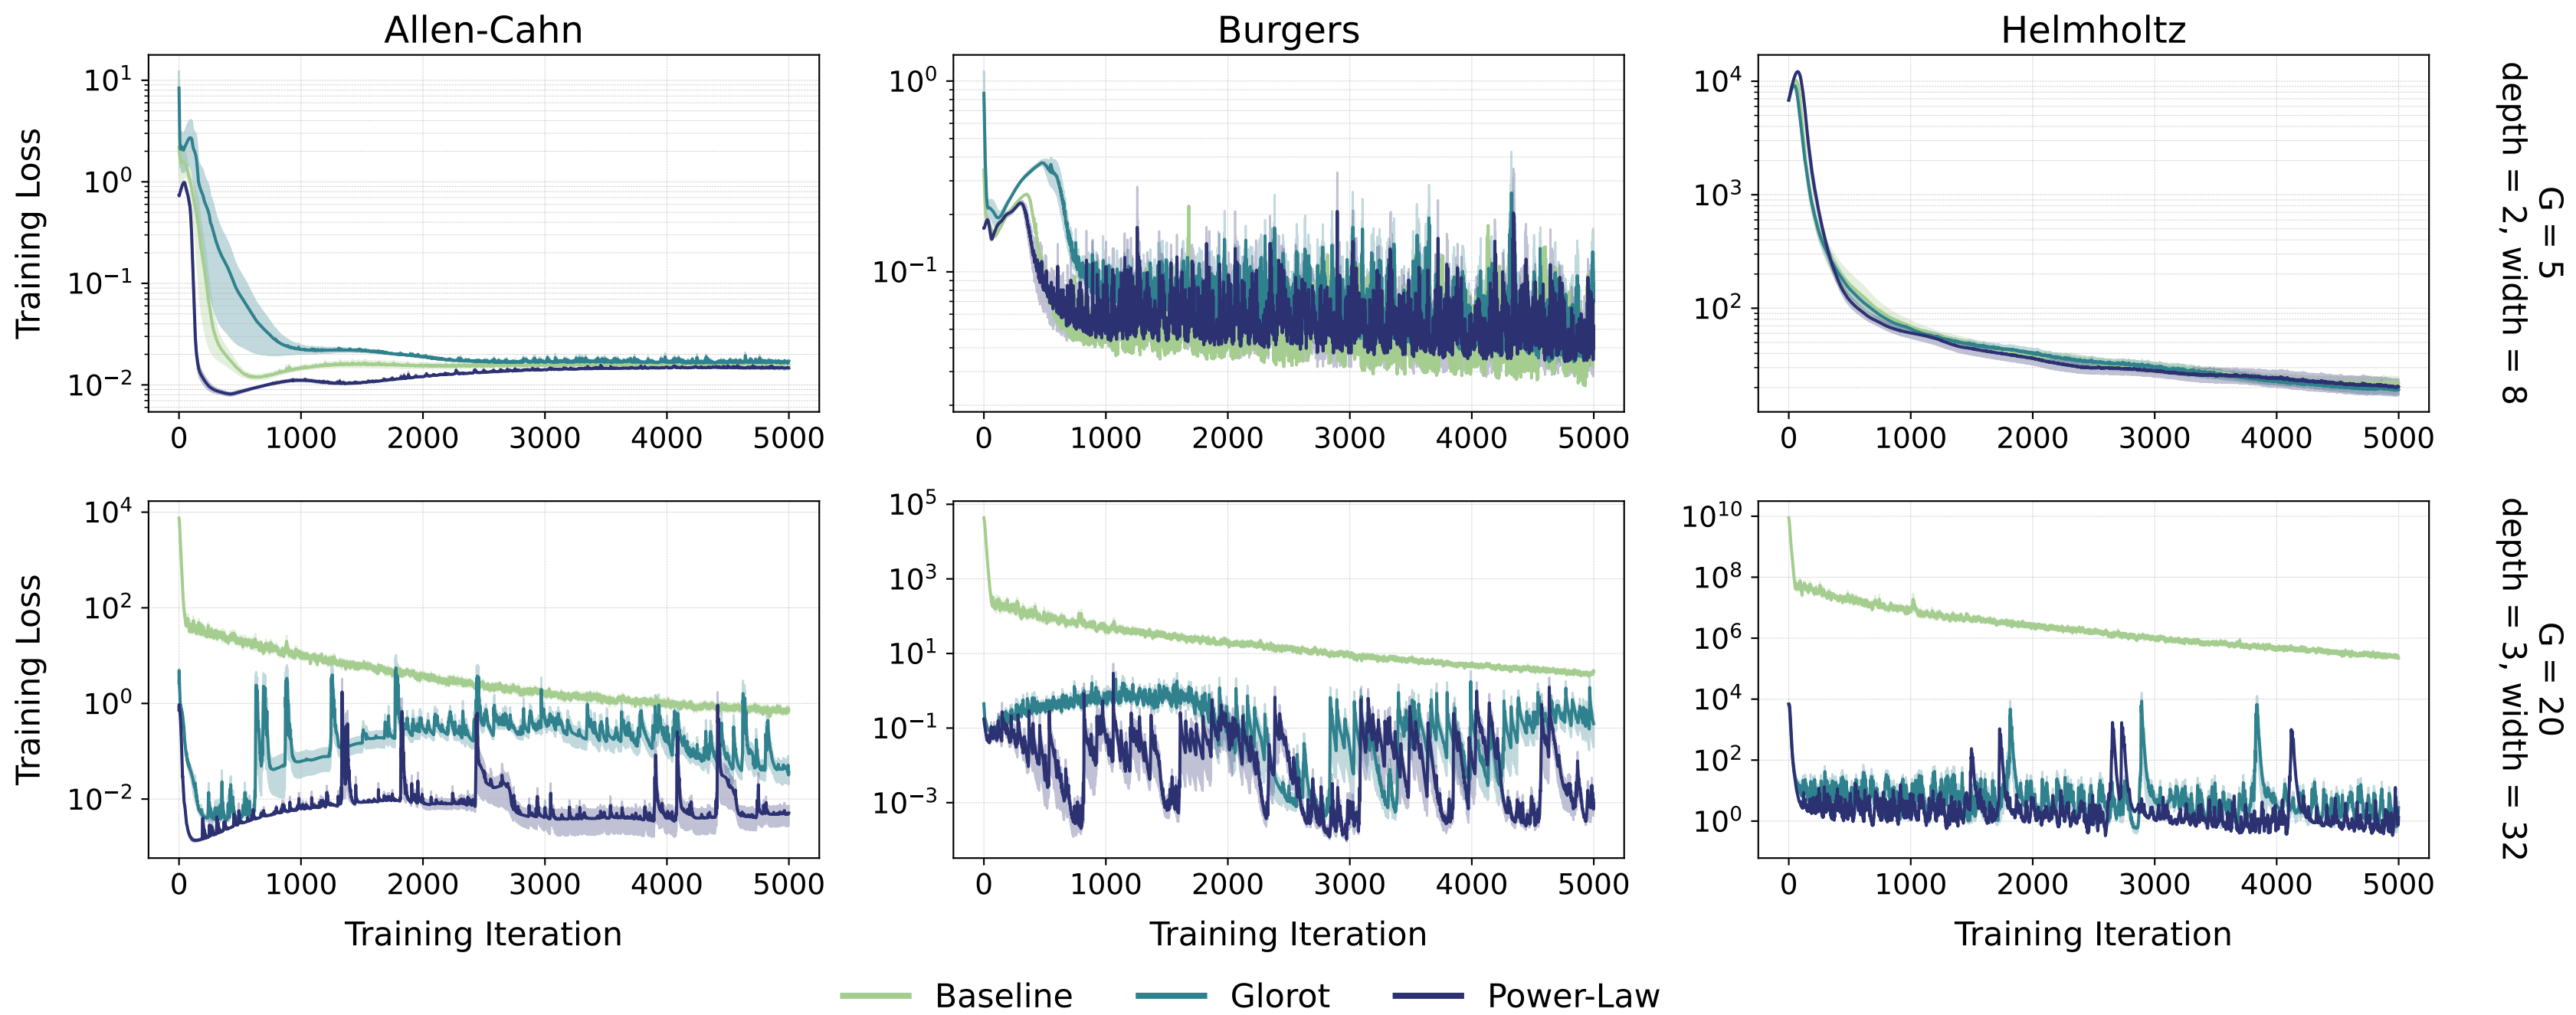

Supplement: supplementary_material [file pde_losses.pdf › main_plots/pde_losses.pdf]

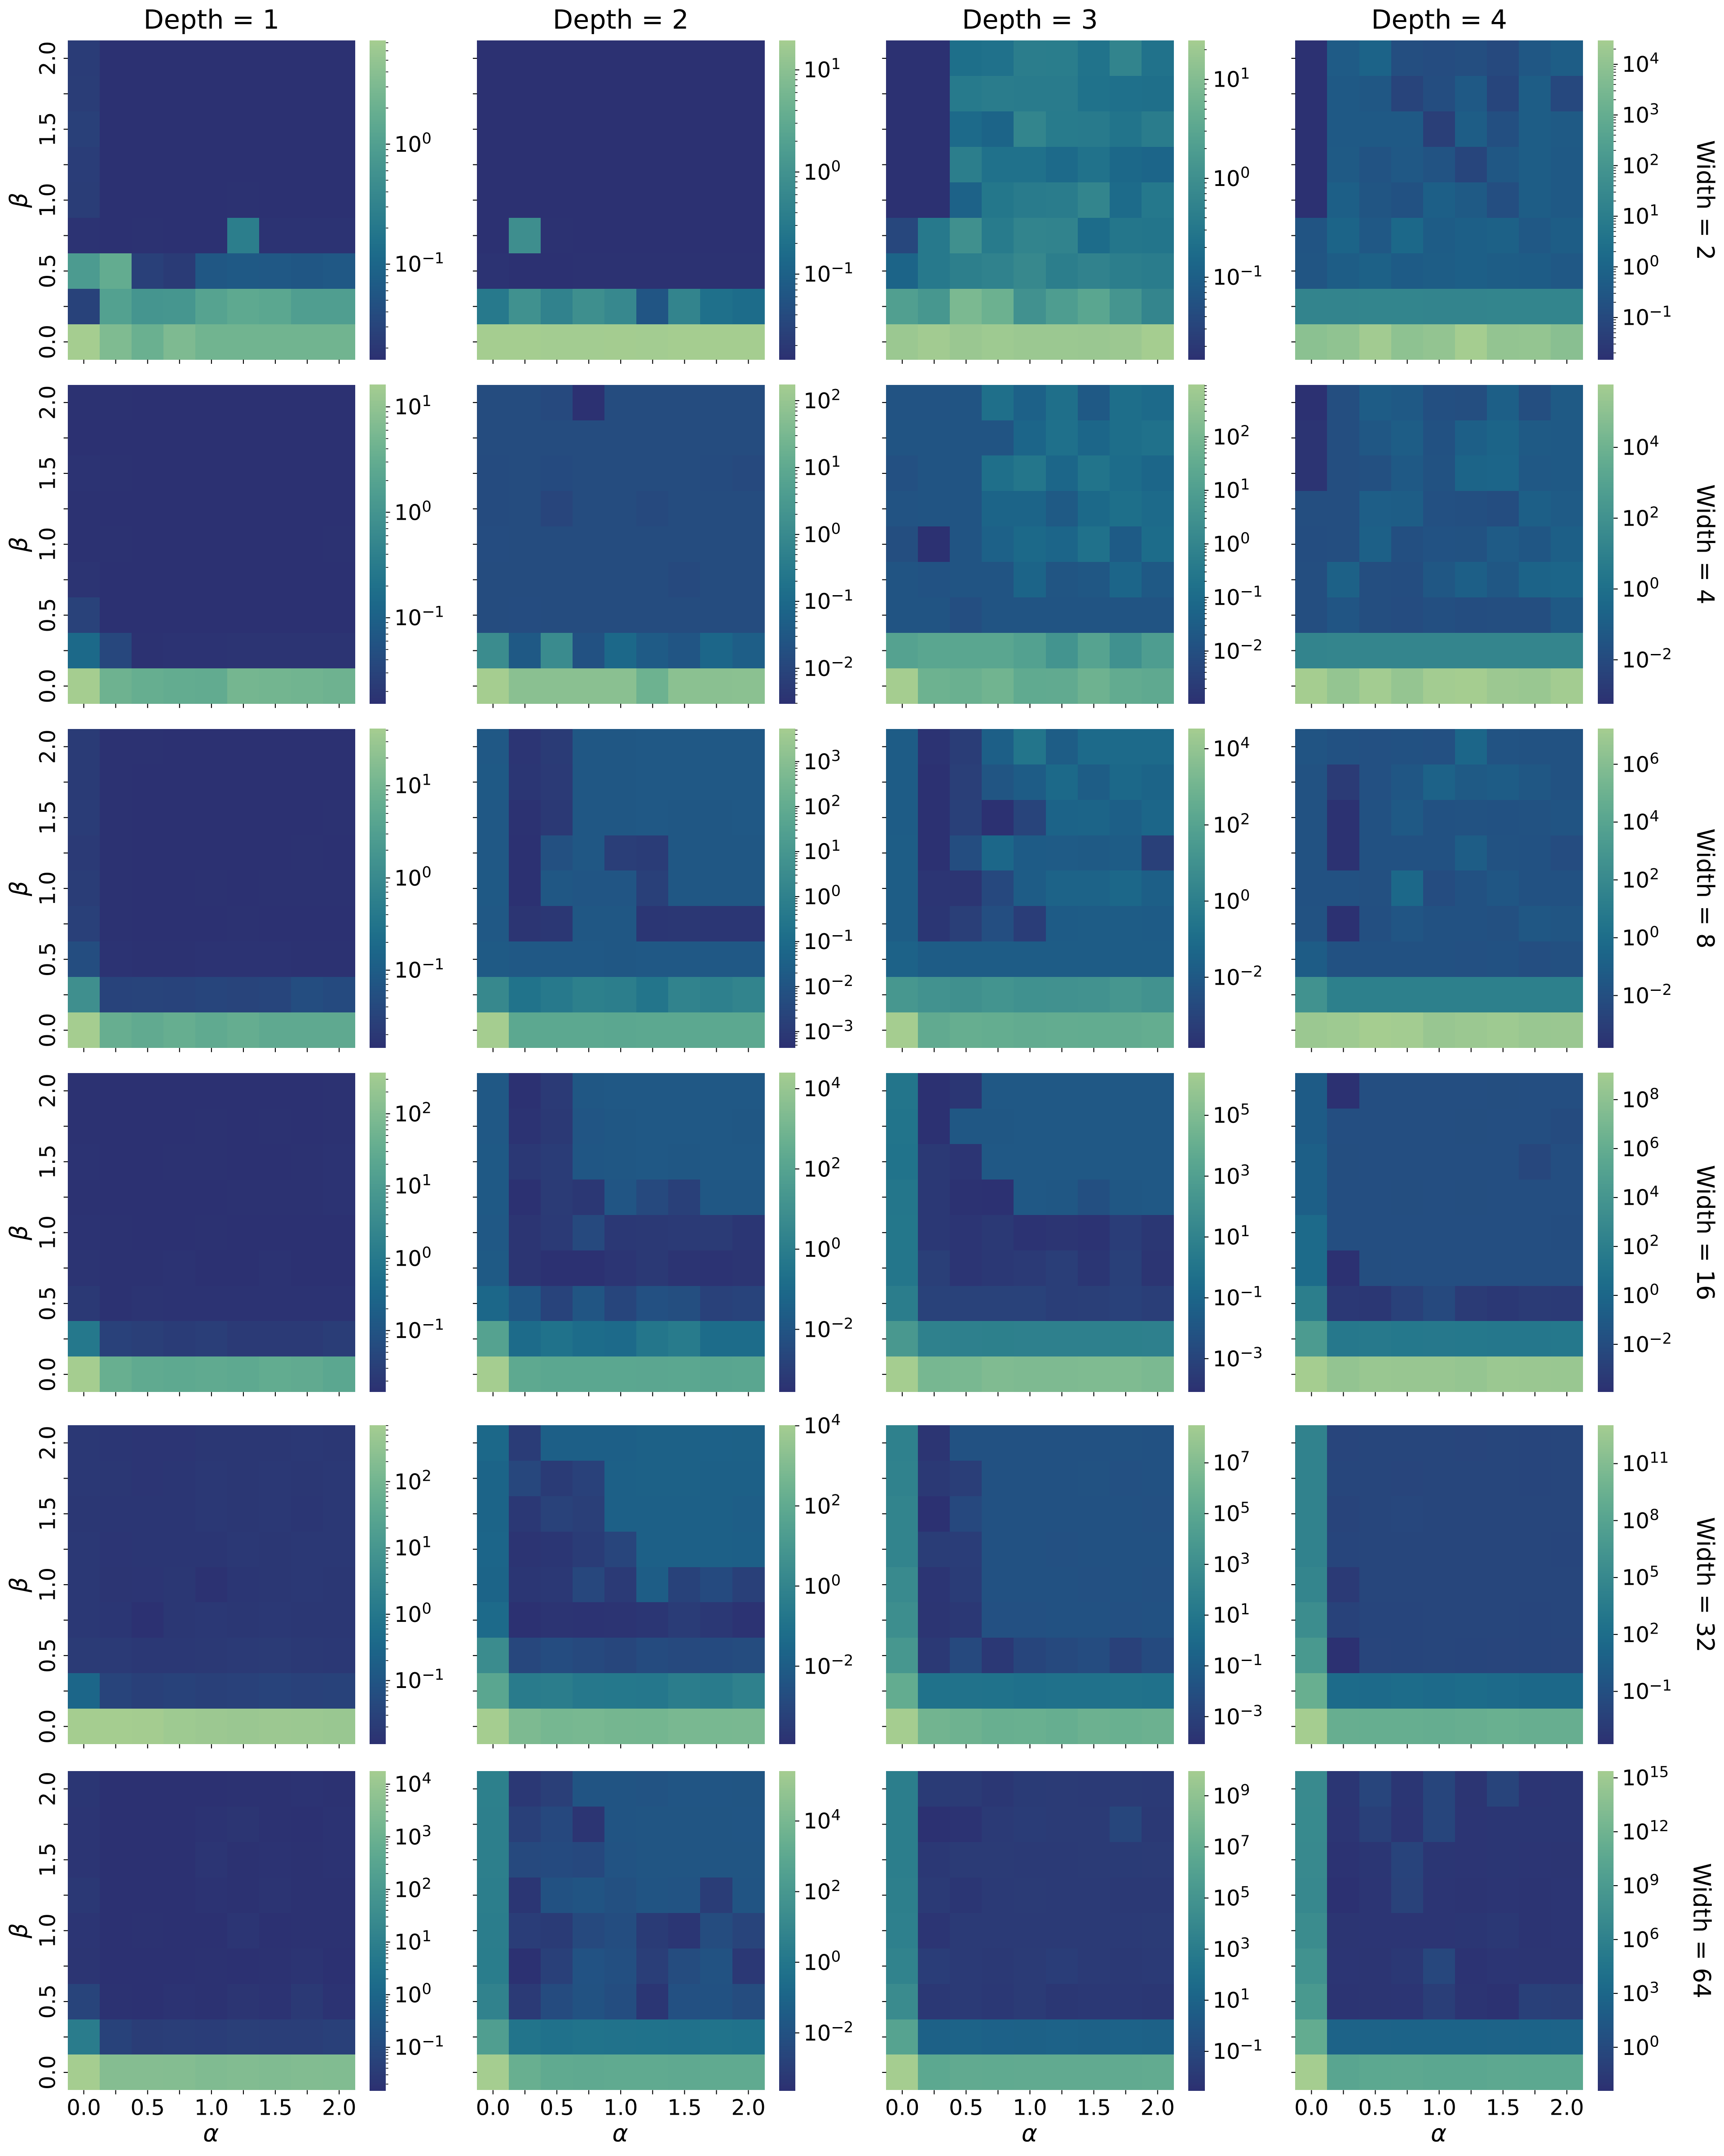

Supplement: supplementary_material [file G10_ac.pdf › supplementary_plots/G10_ac.pdf]

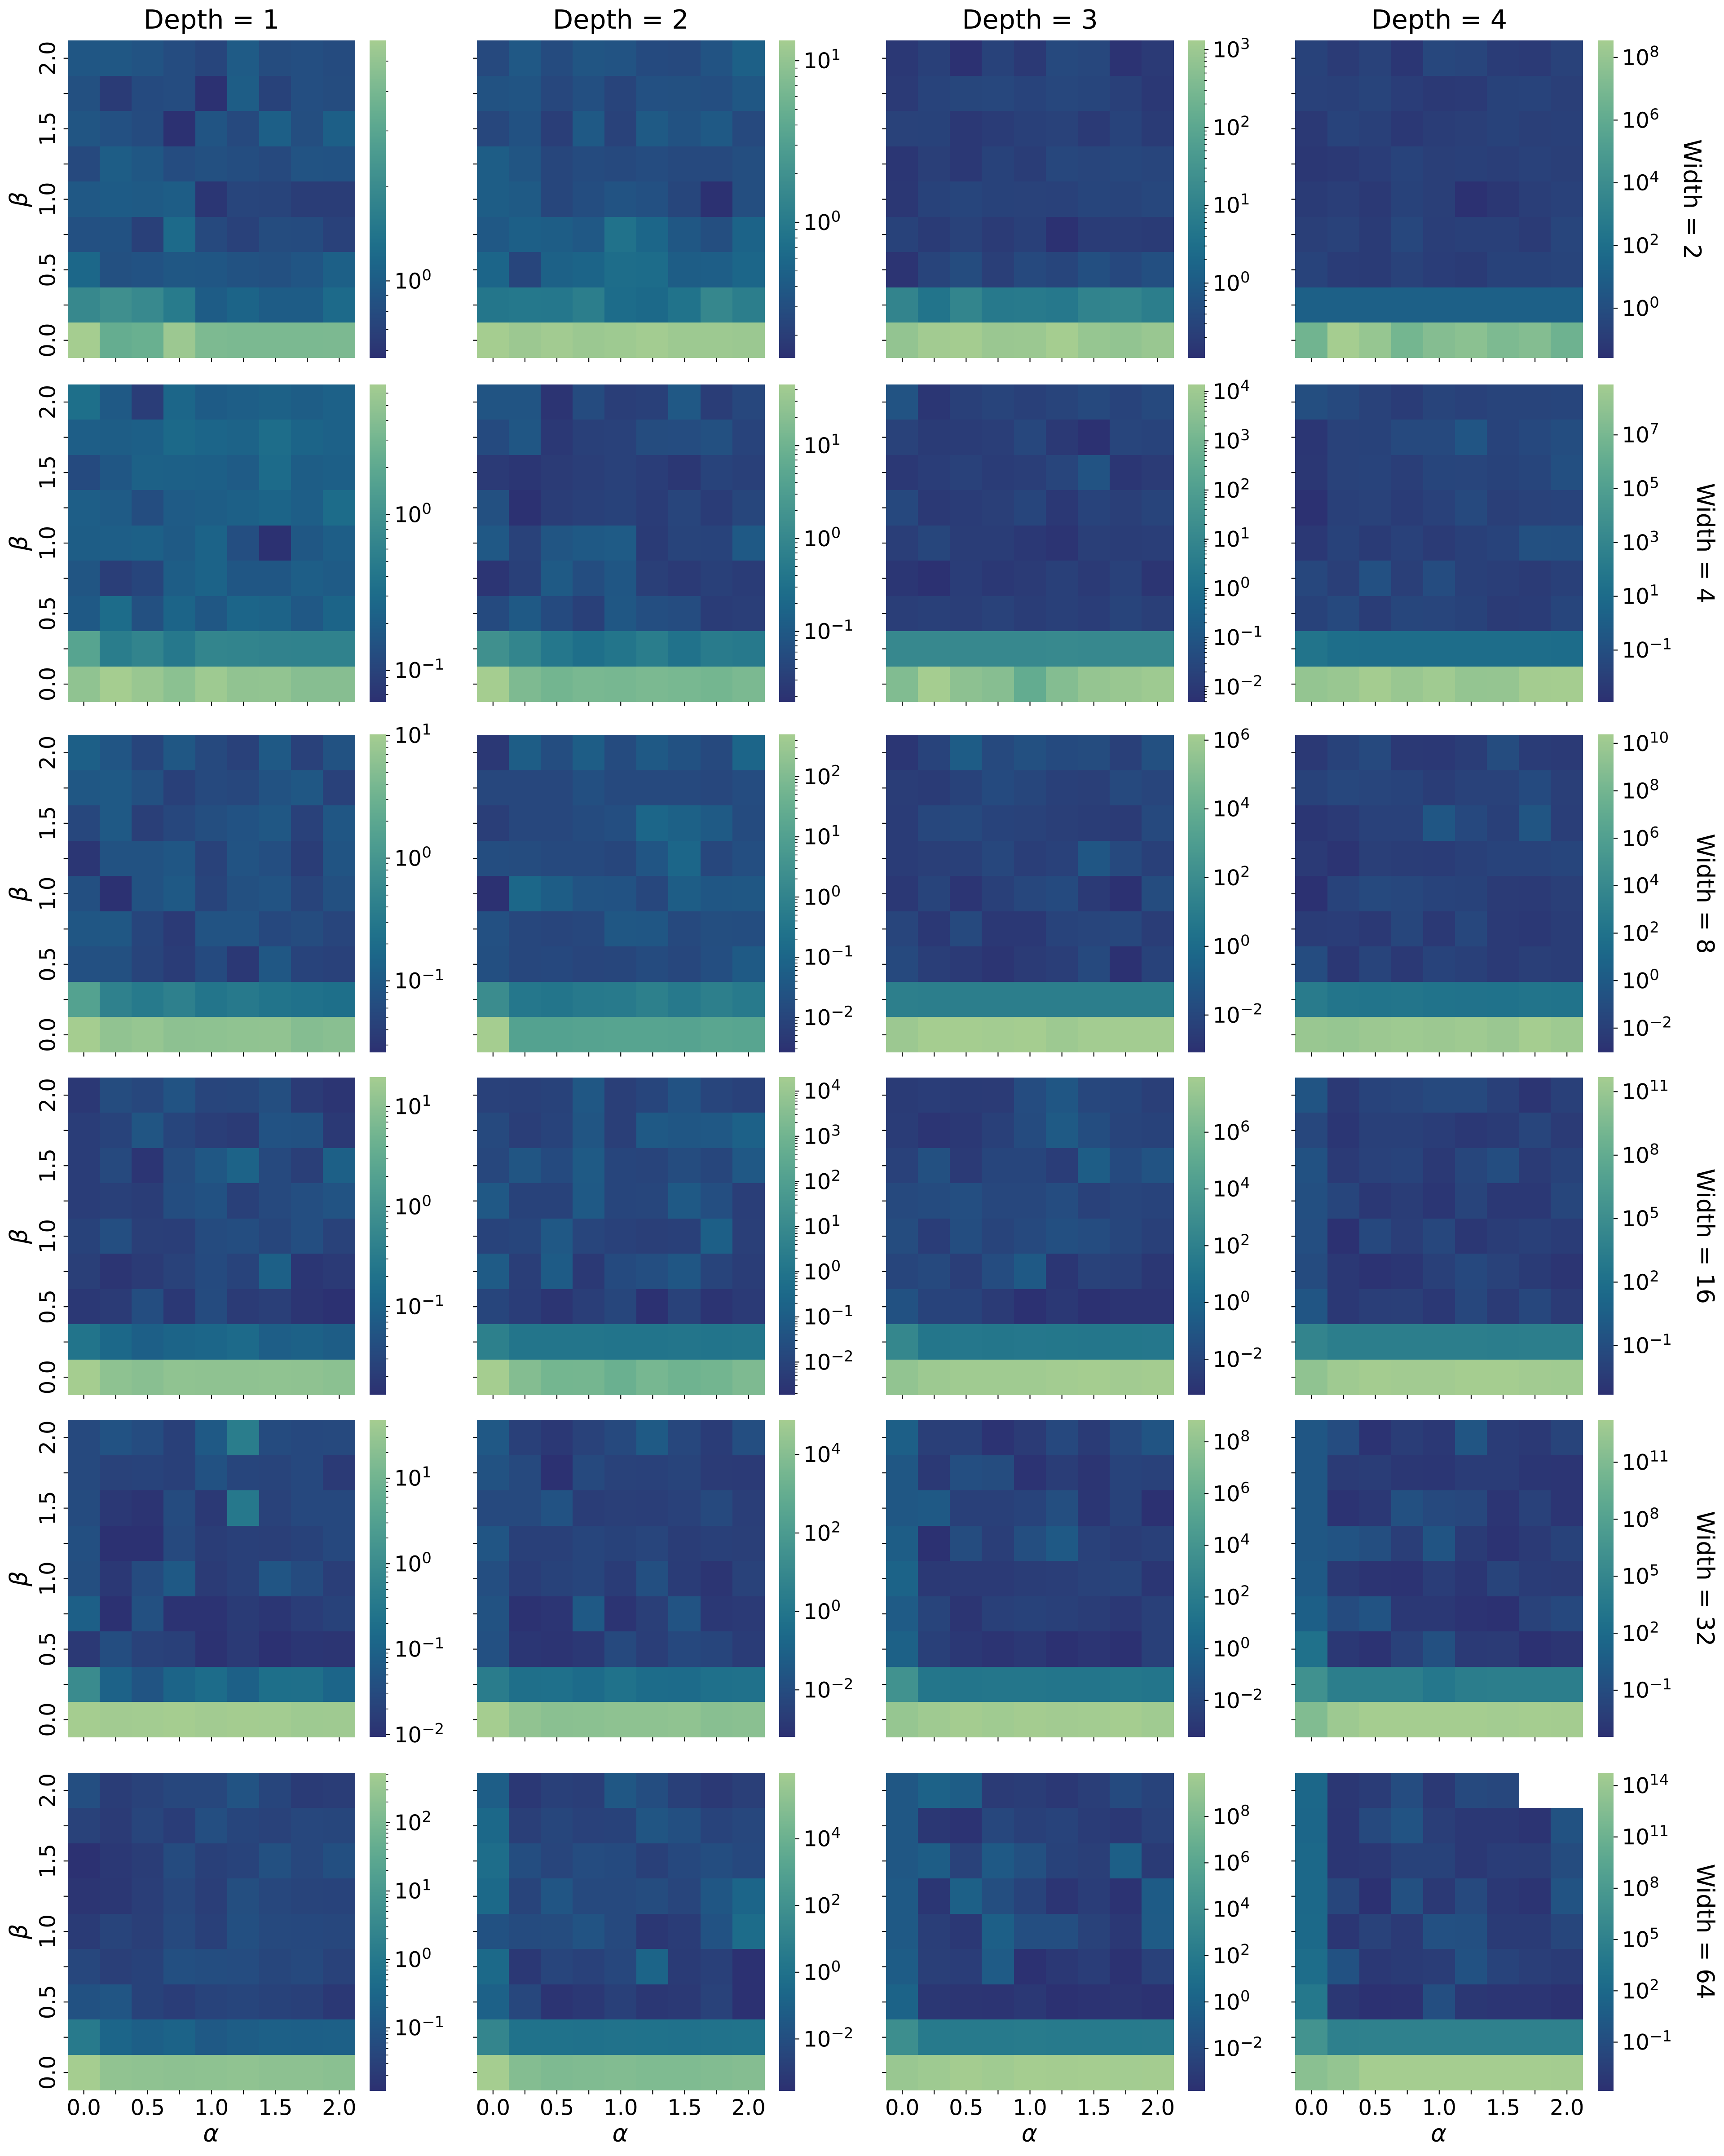

Supplement: supplementary_material [file G10_burgers.pdf › supplementary_plots/G10_burgers.pdf]

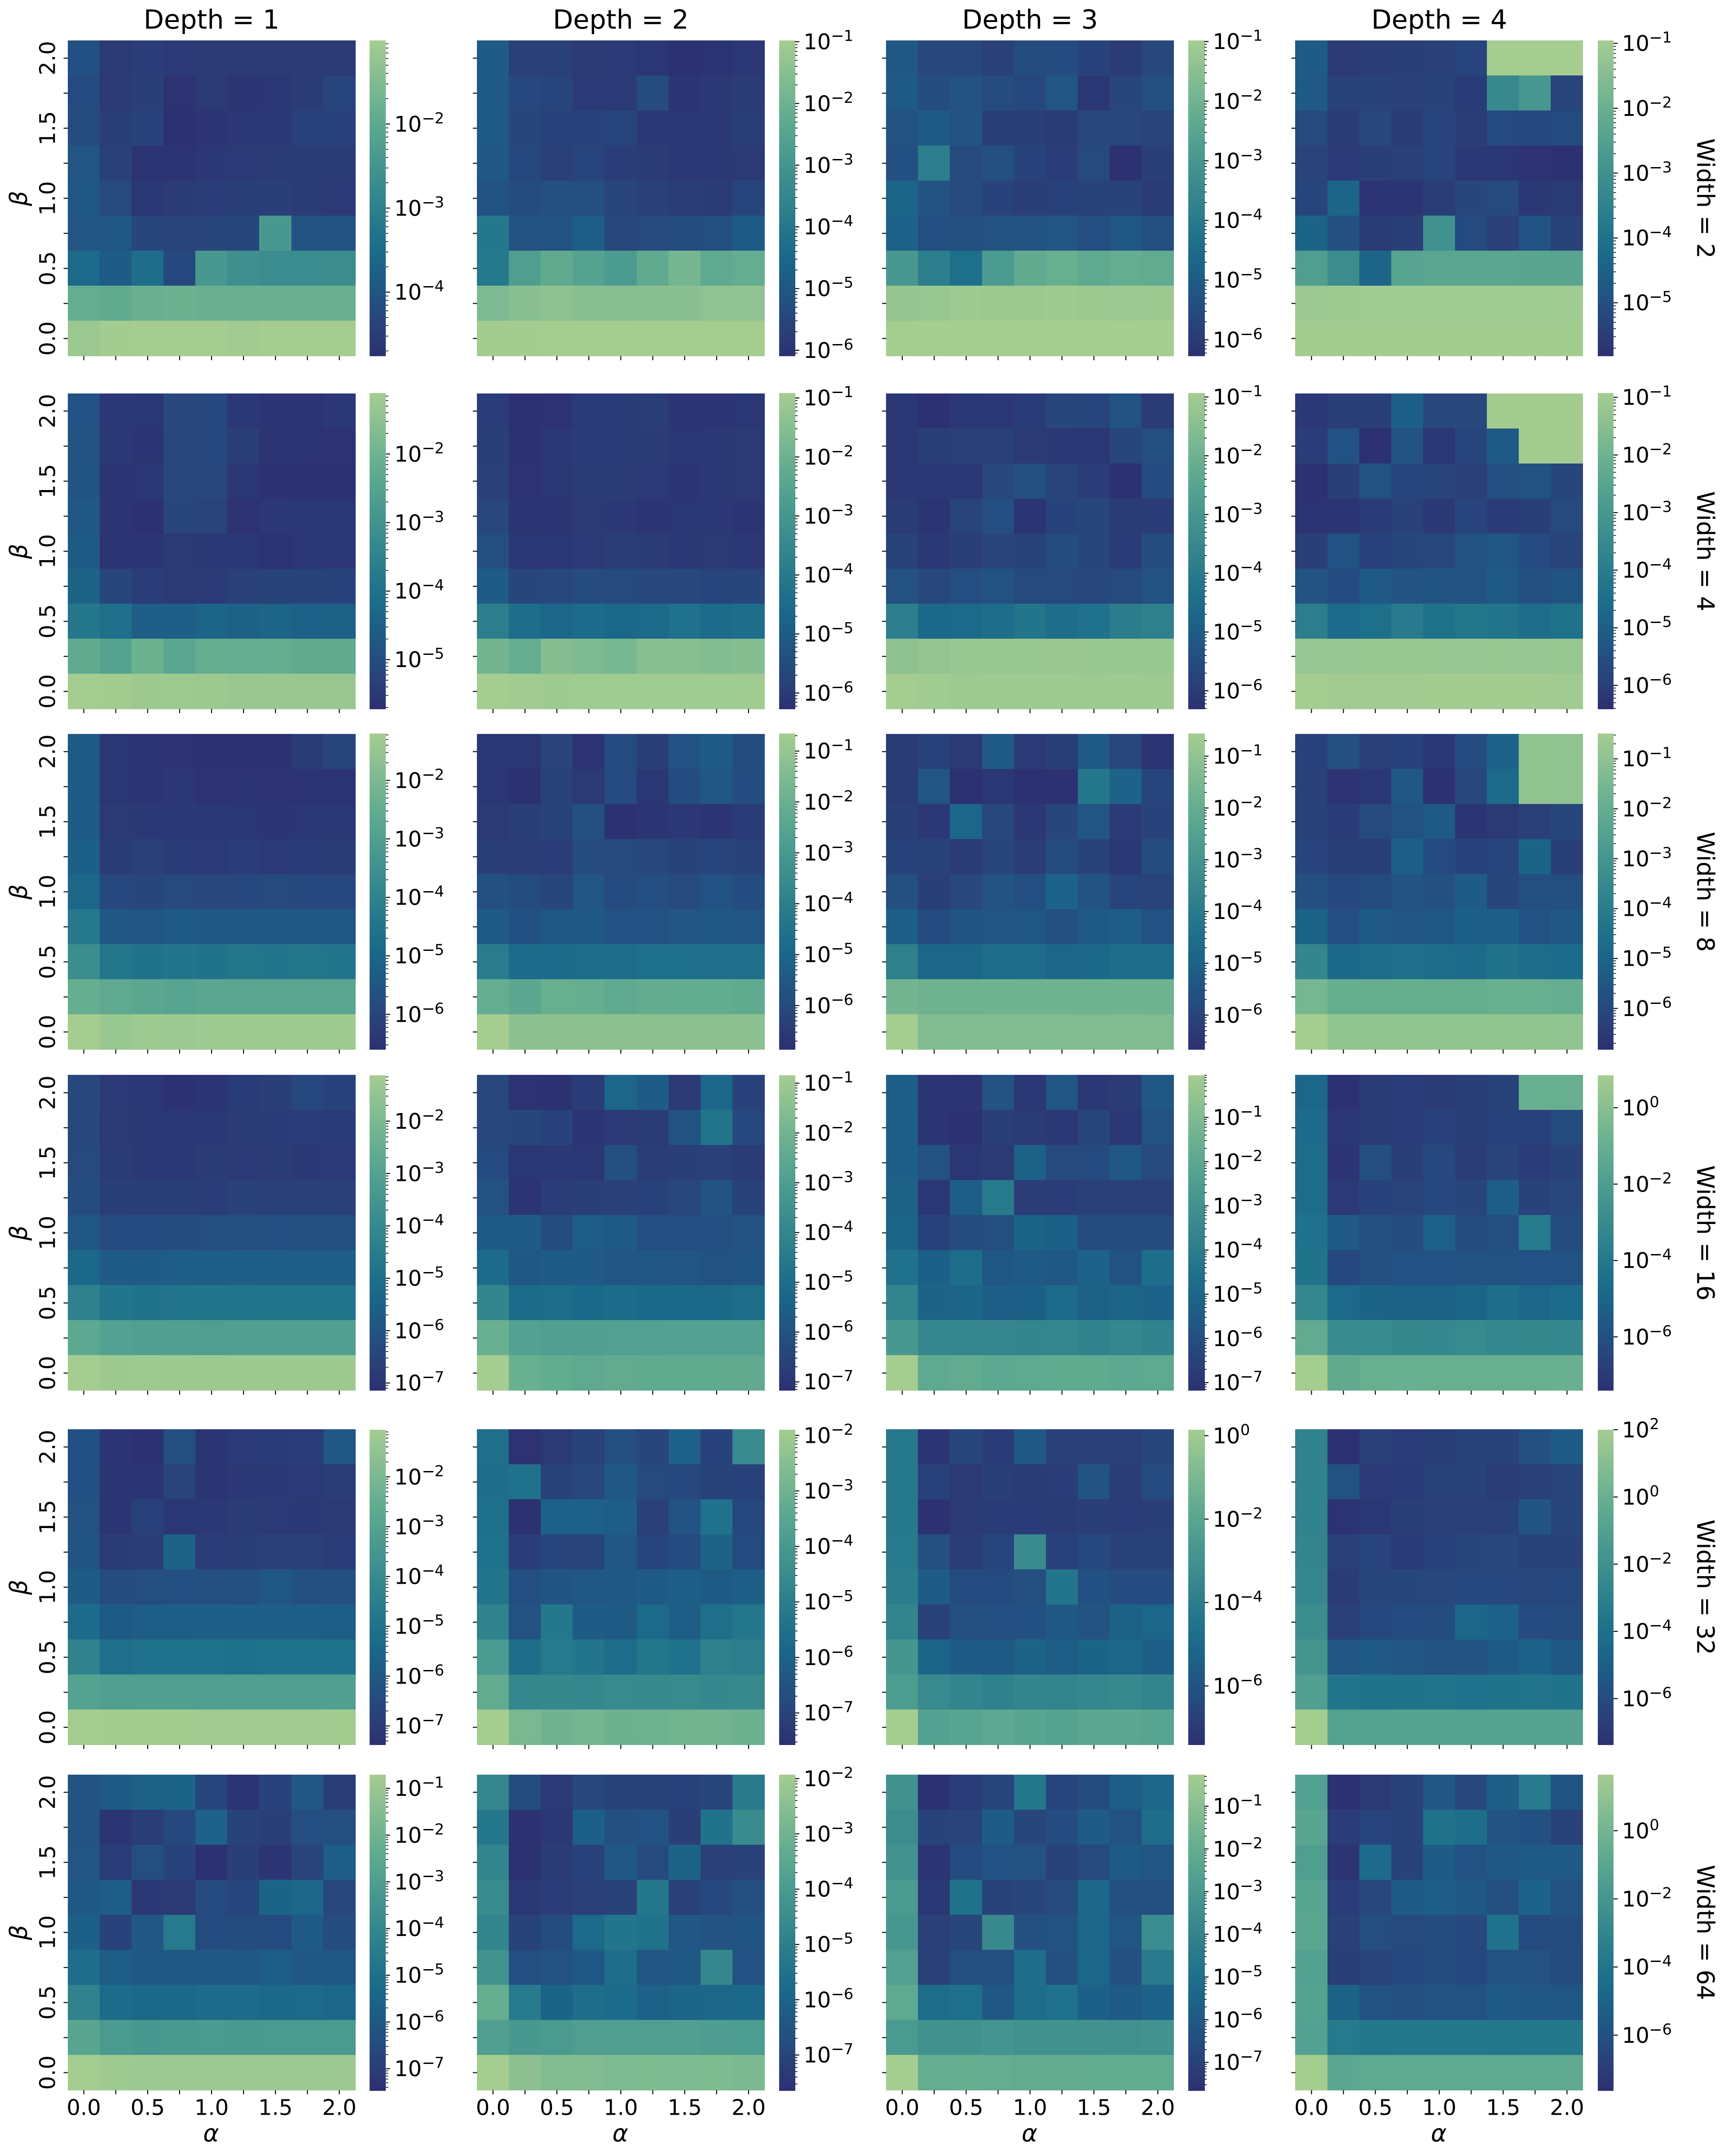

Supplement: supplementary_material [file G10_f1.pdf › supplementary_plots/G10_f1.pdf]

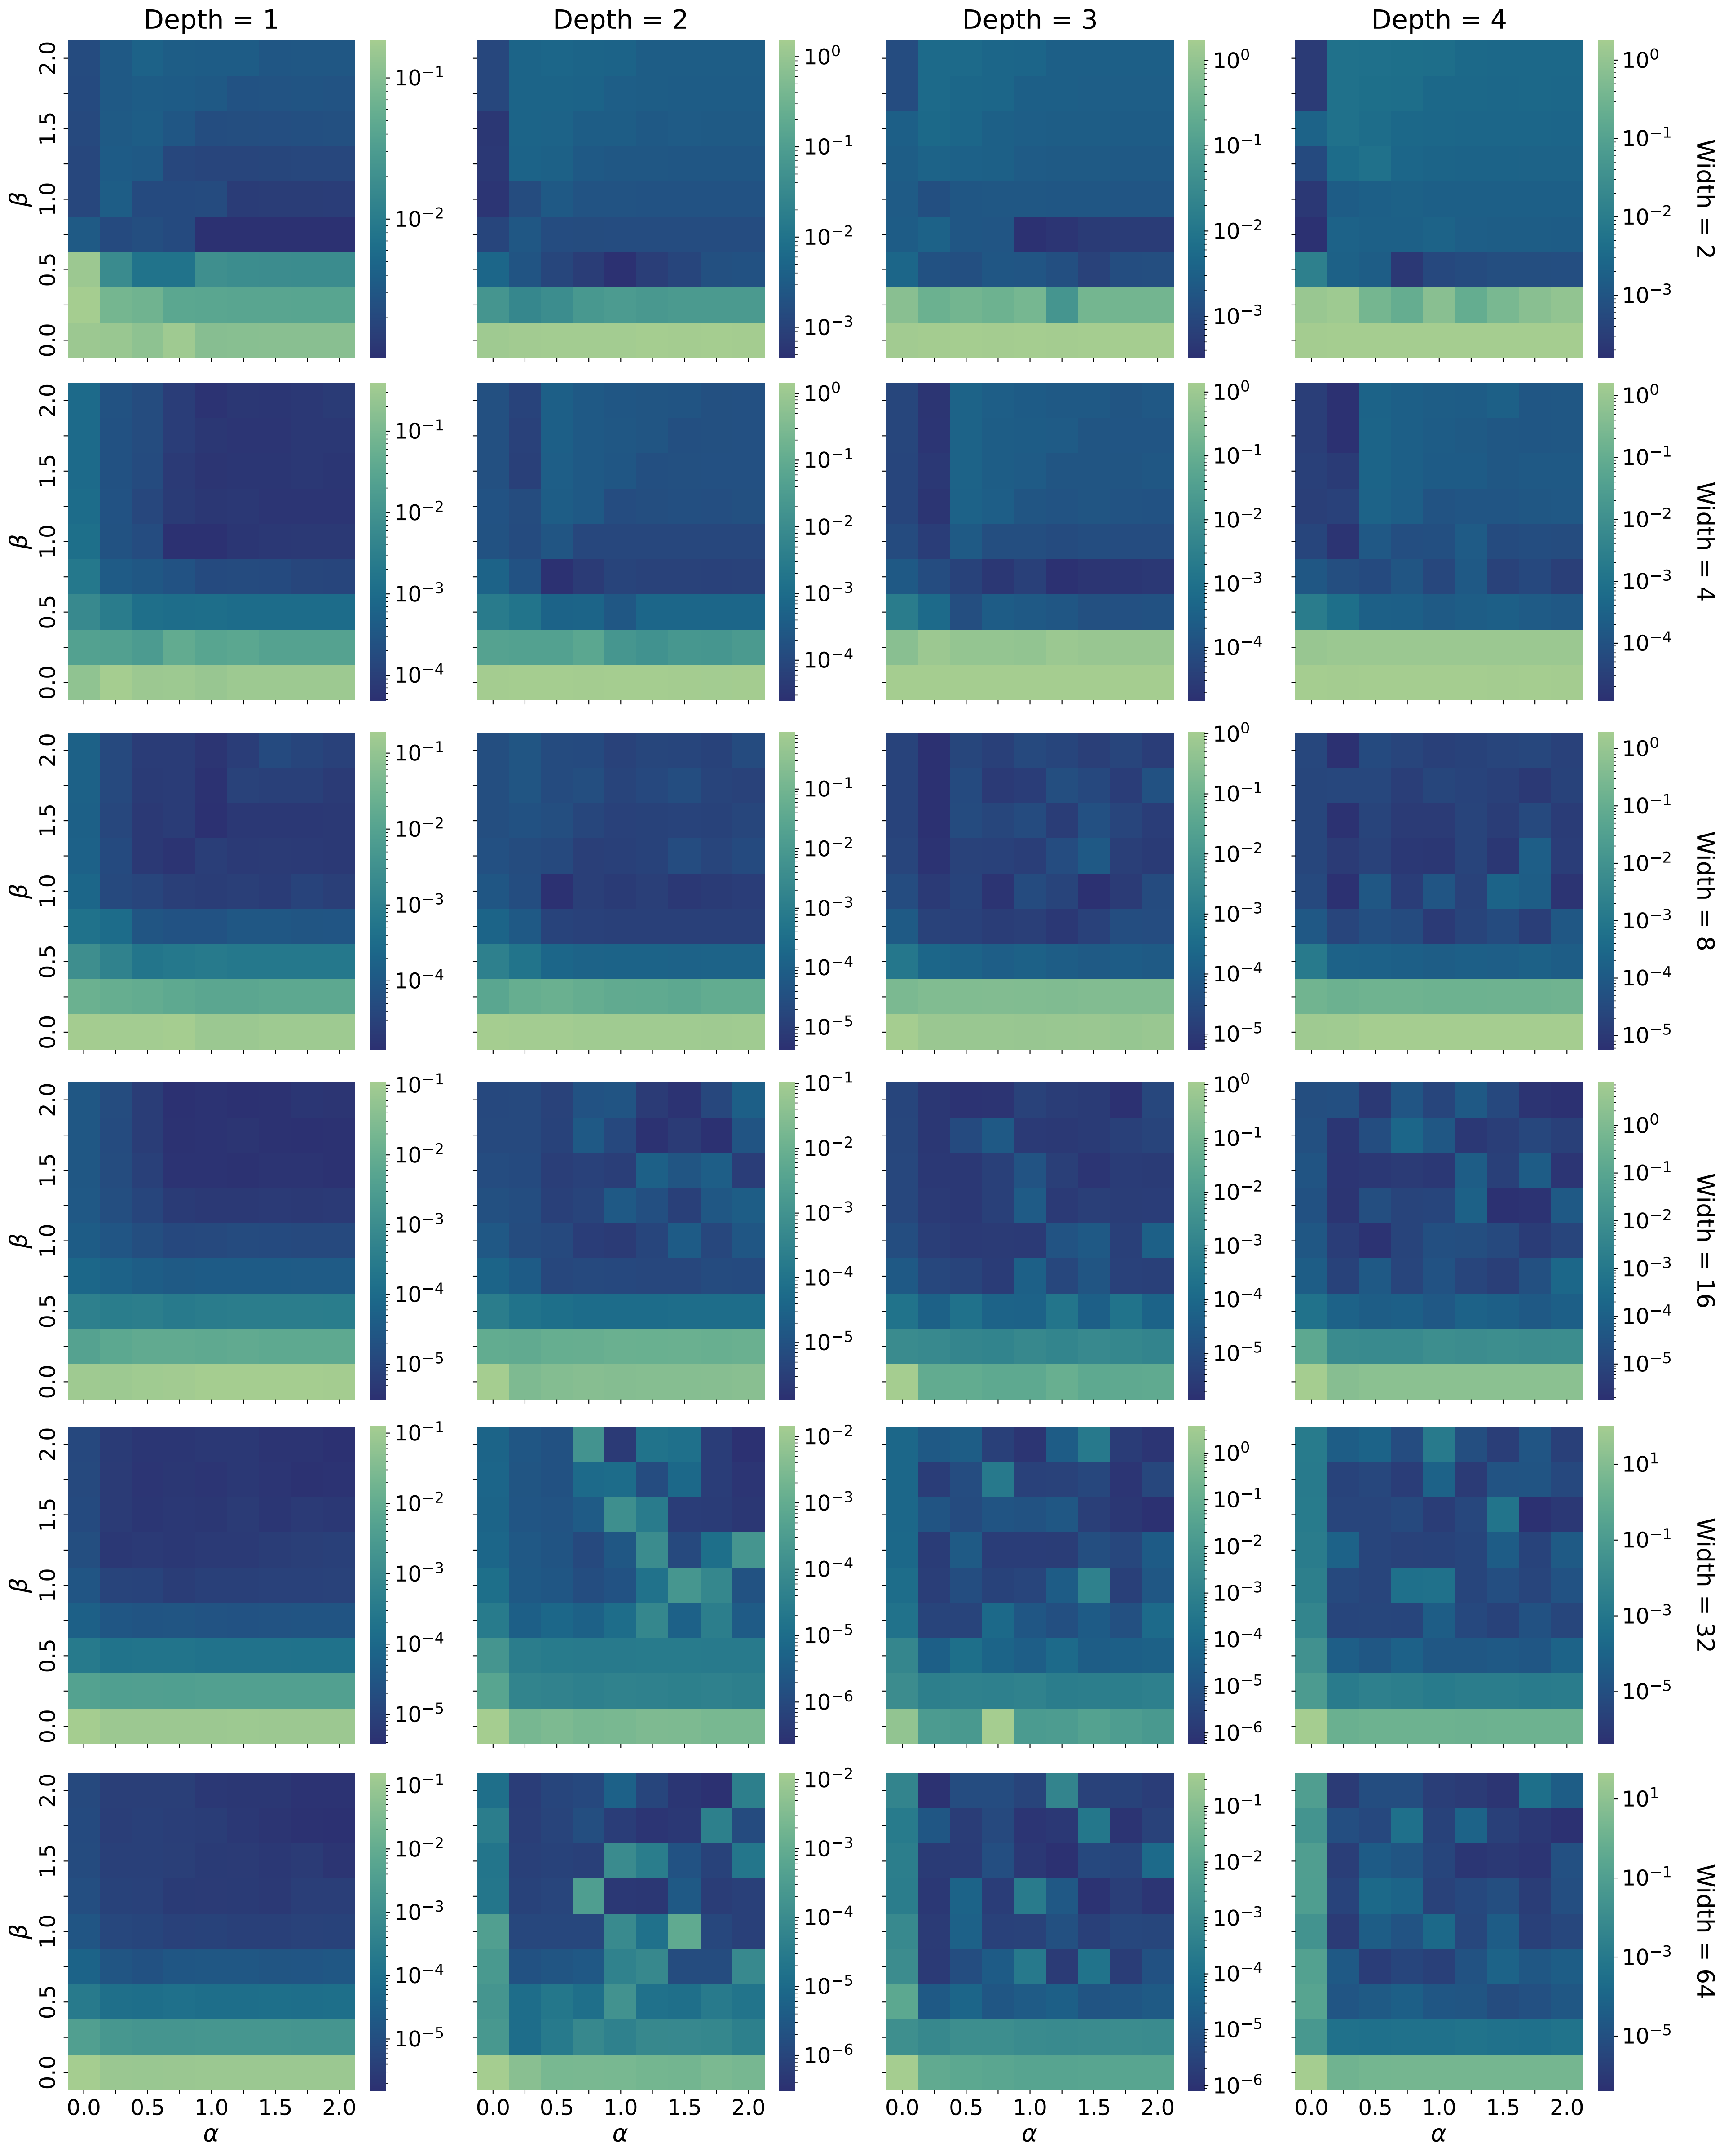

Supplement: supplementary_material [file G10_f2.pdf › supplementary_plots/G10_f2.pdf]

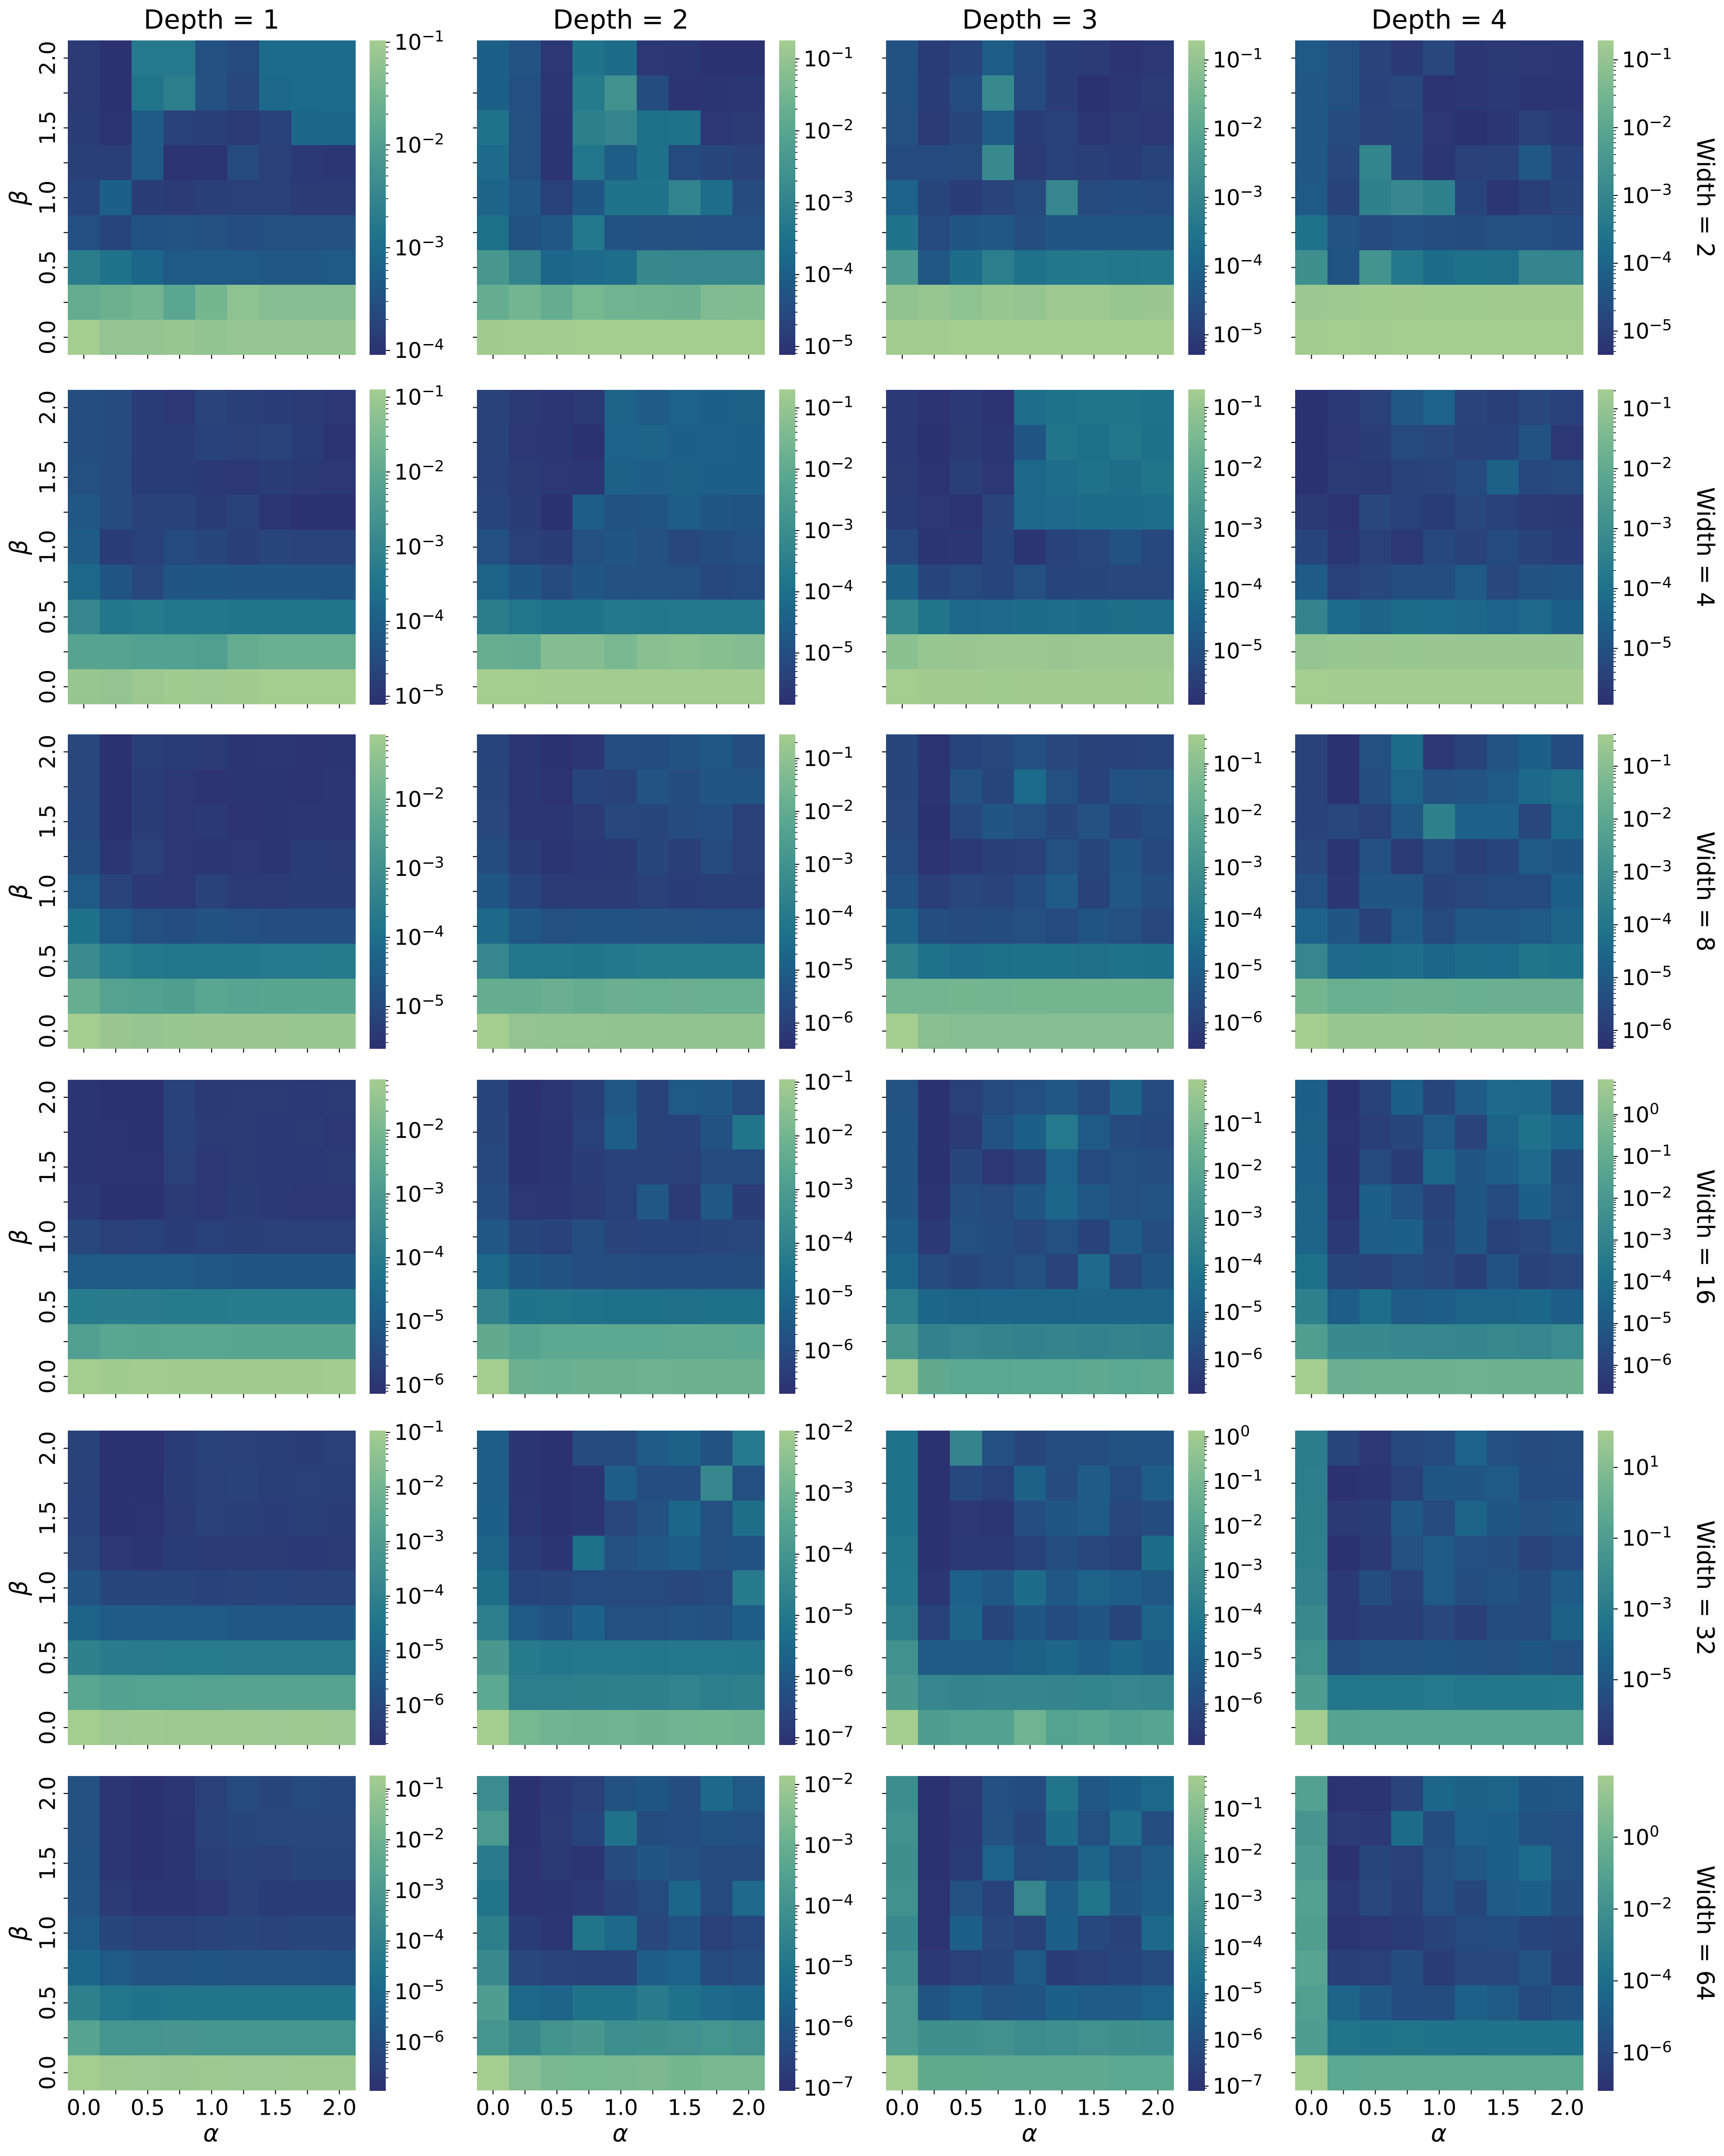

Supplement: supplementary_material [file G10_f3.pdf › supplementary_plots/G10_f3.pdf]

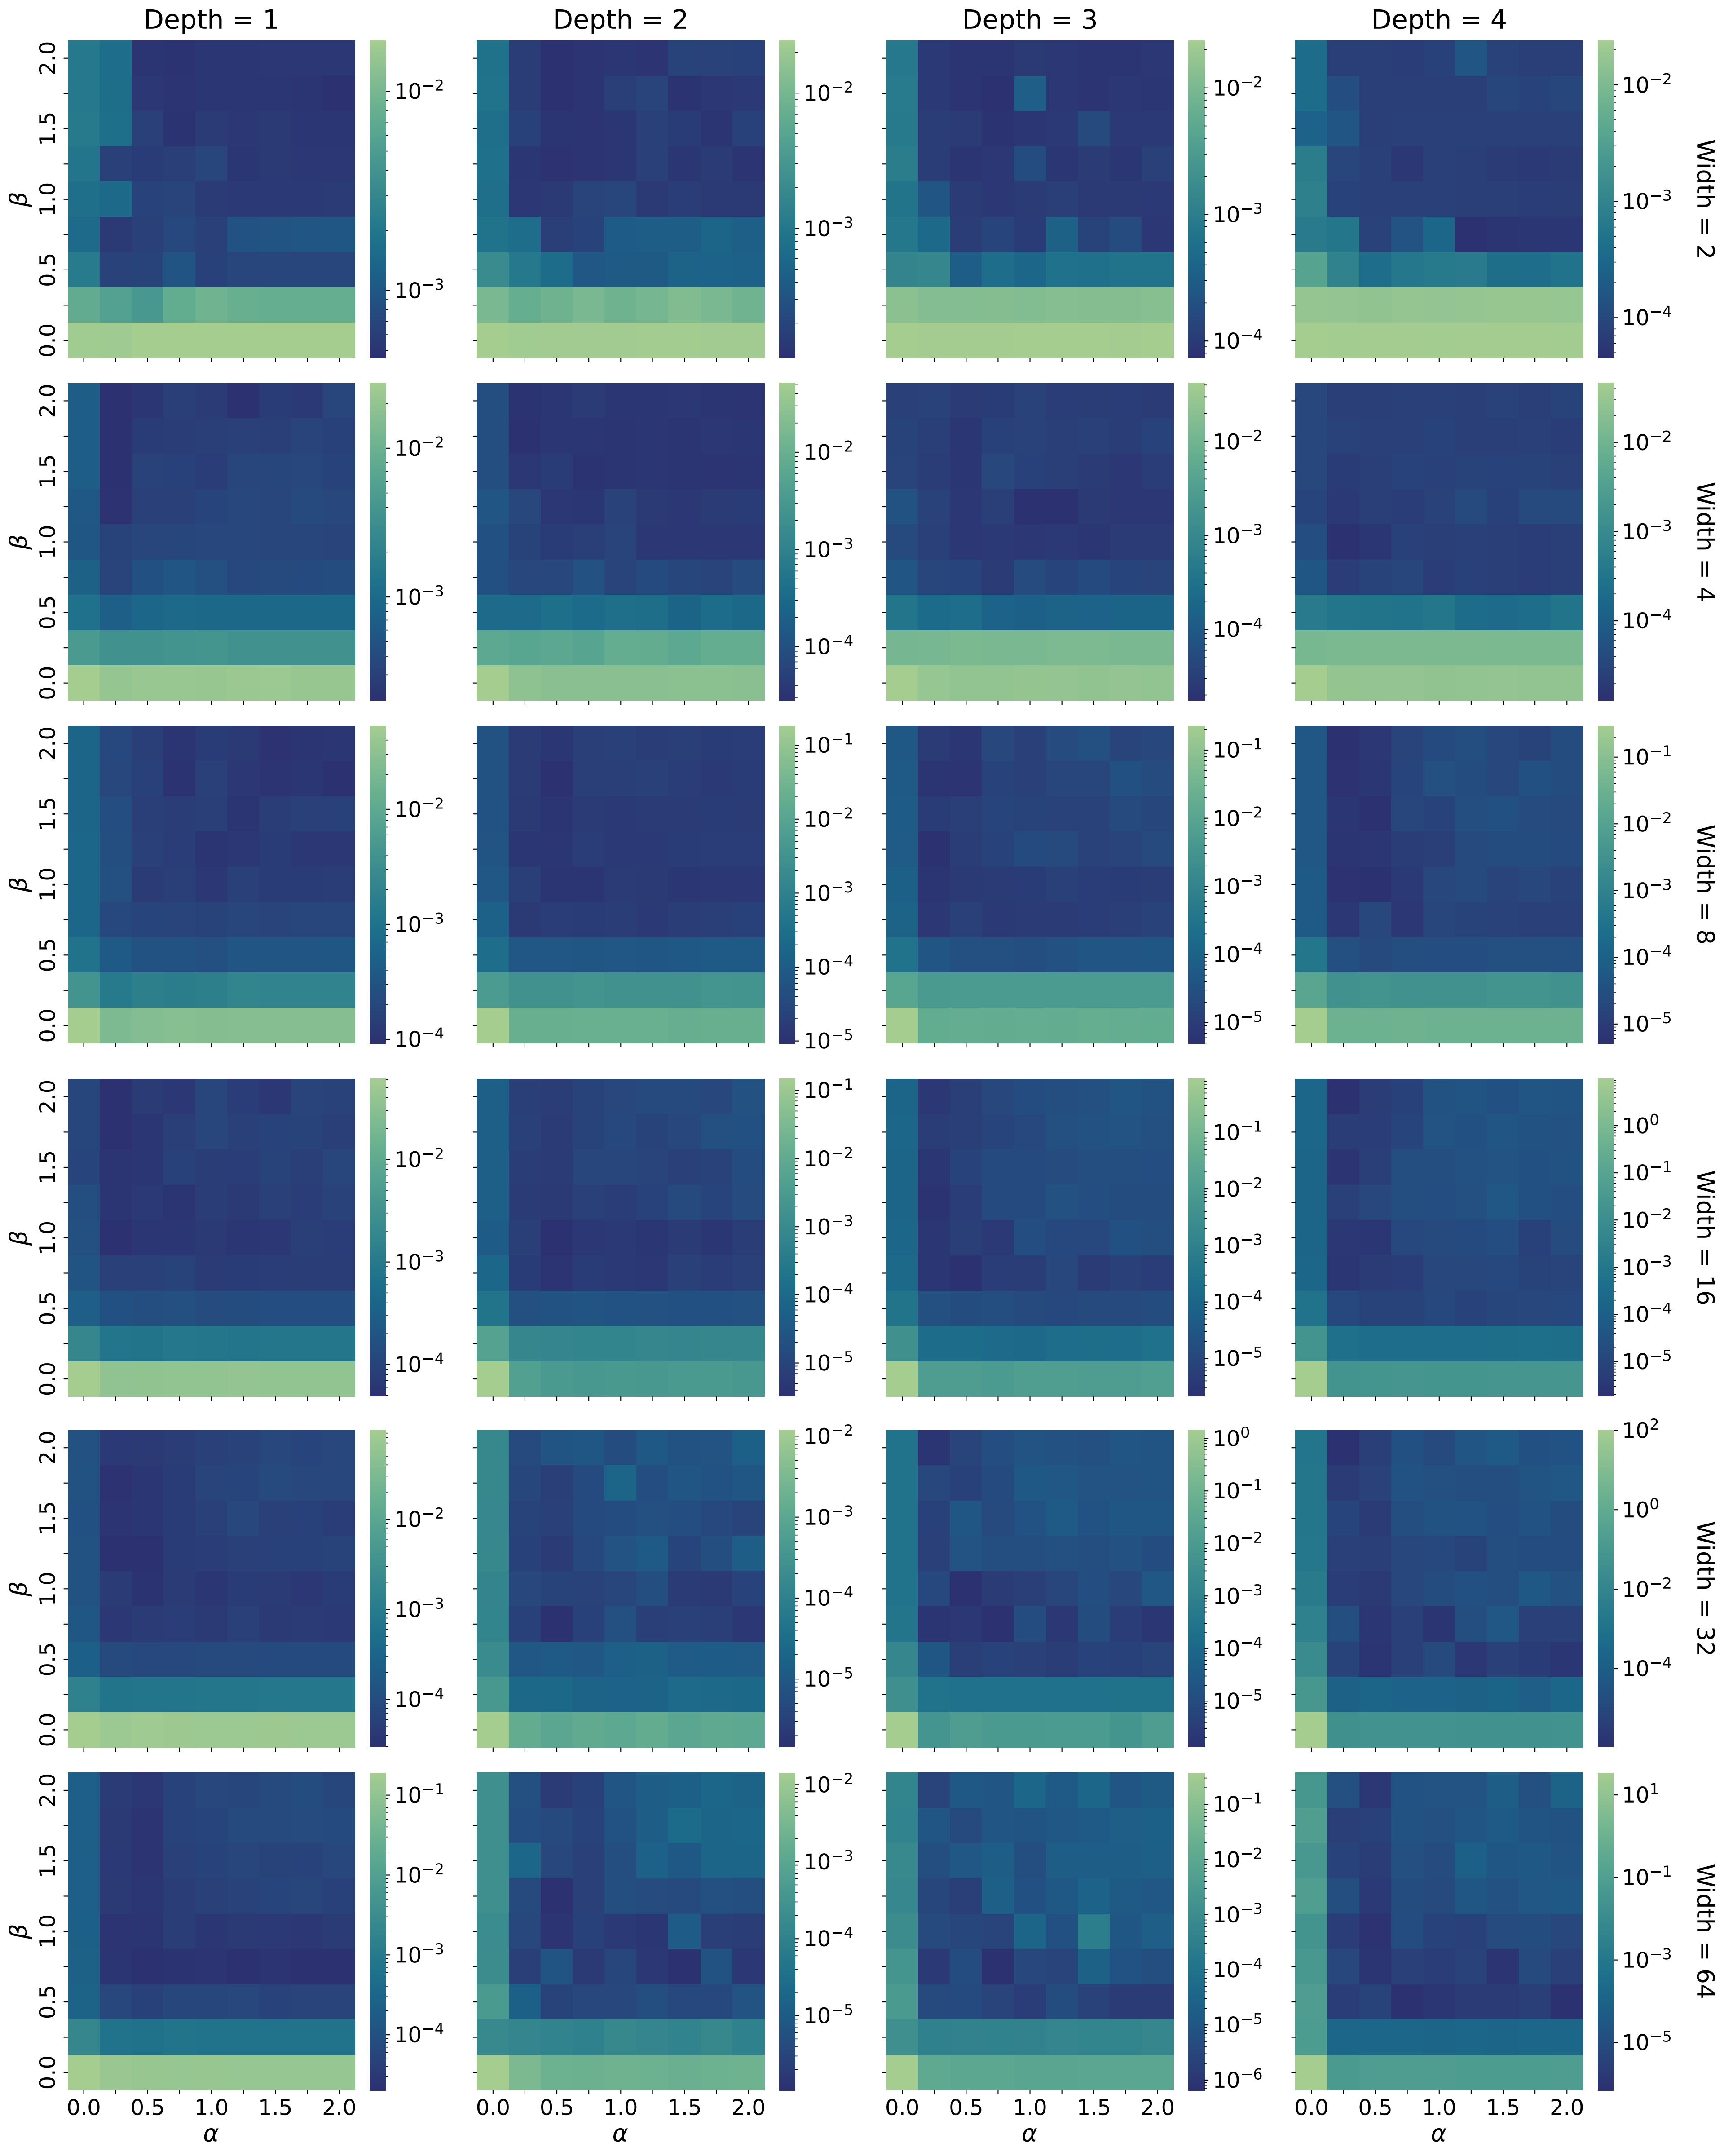

Supplement: supplementary_material [file G10_f4.pdf › supplementary_plots/G10_f4.pdf]

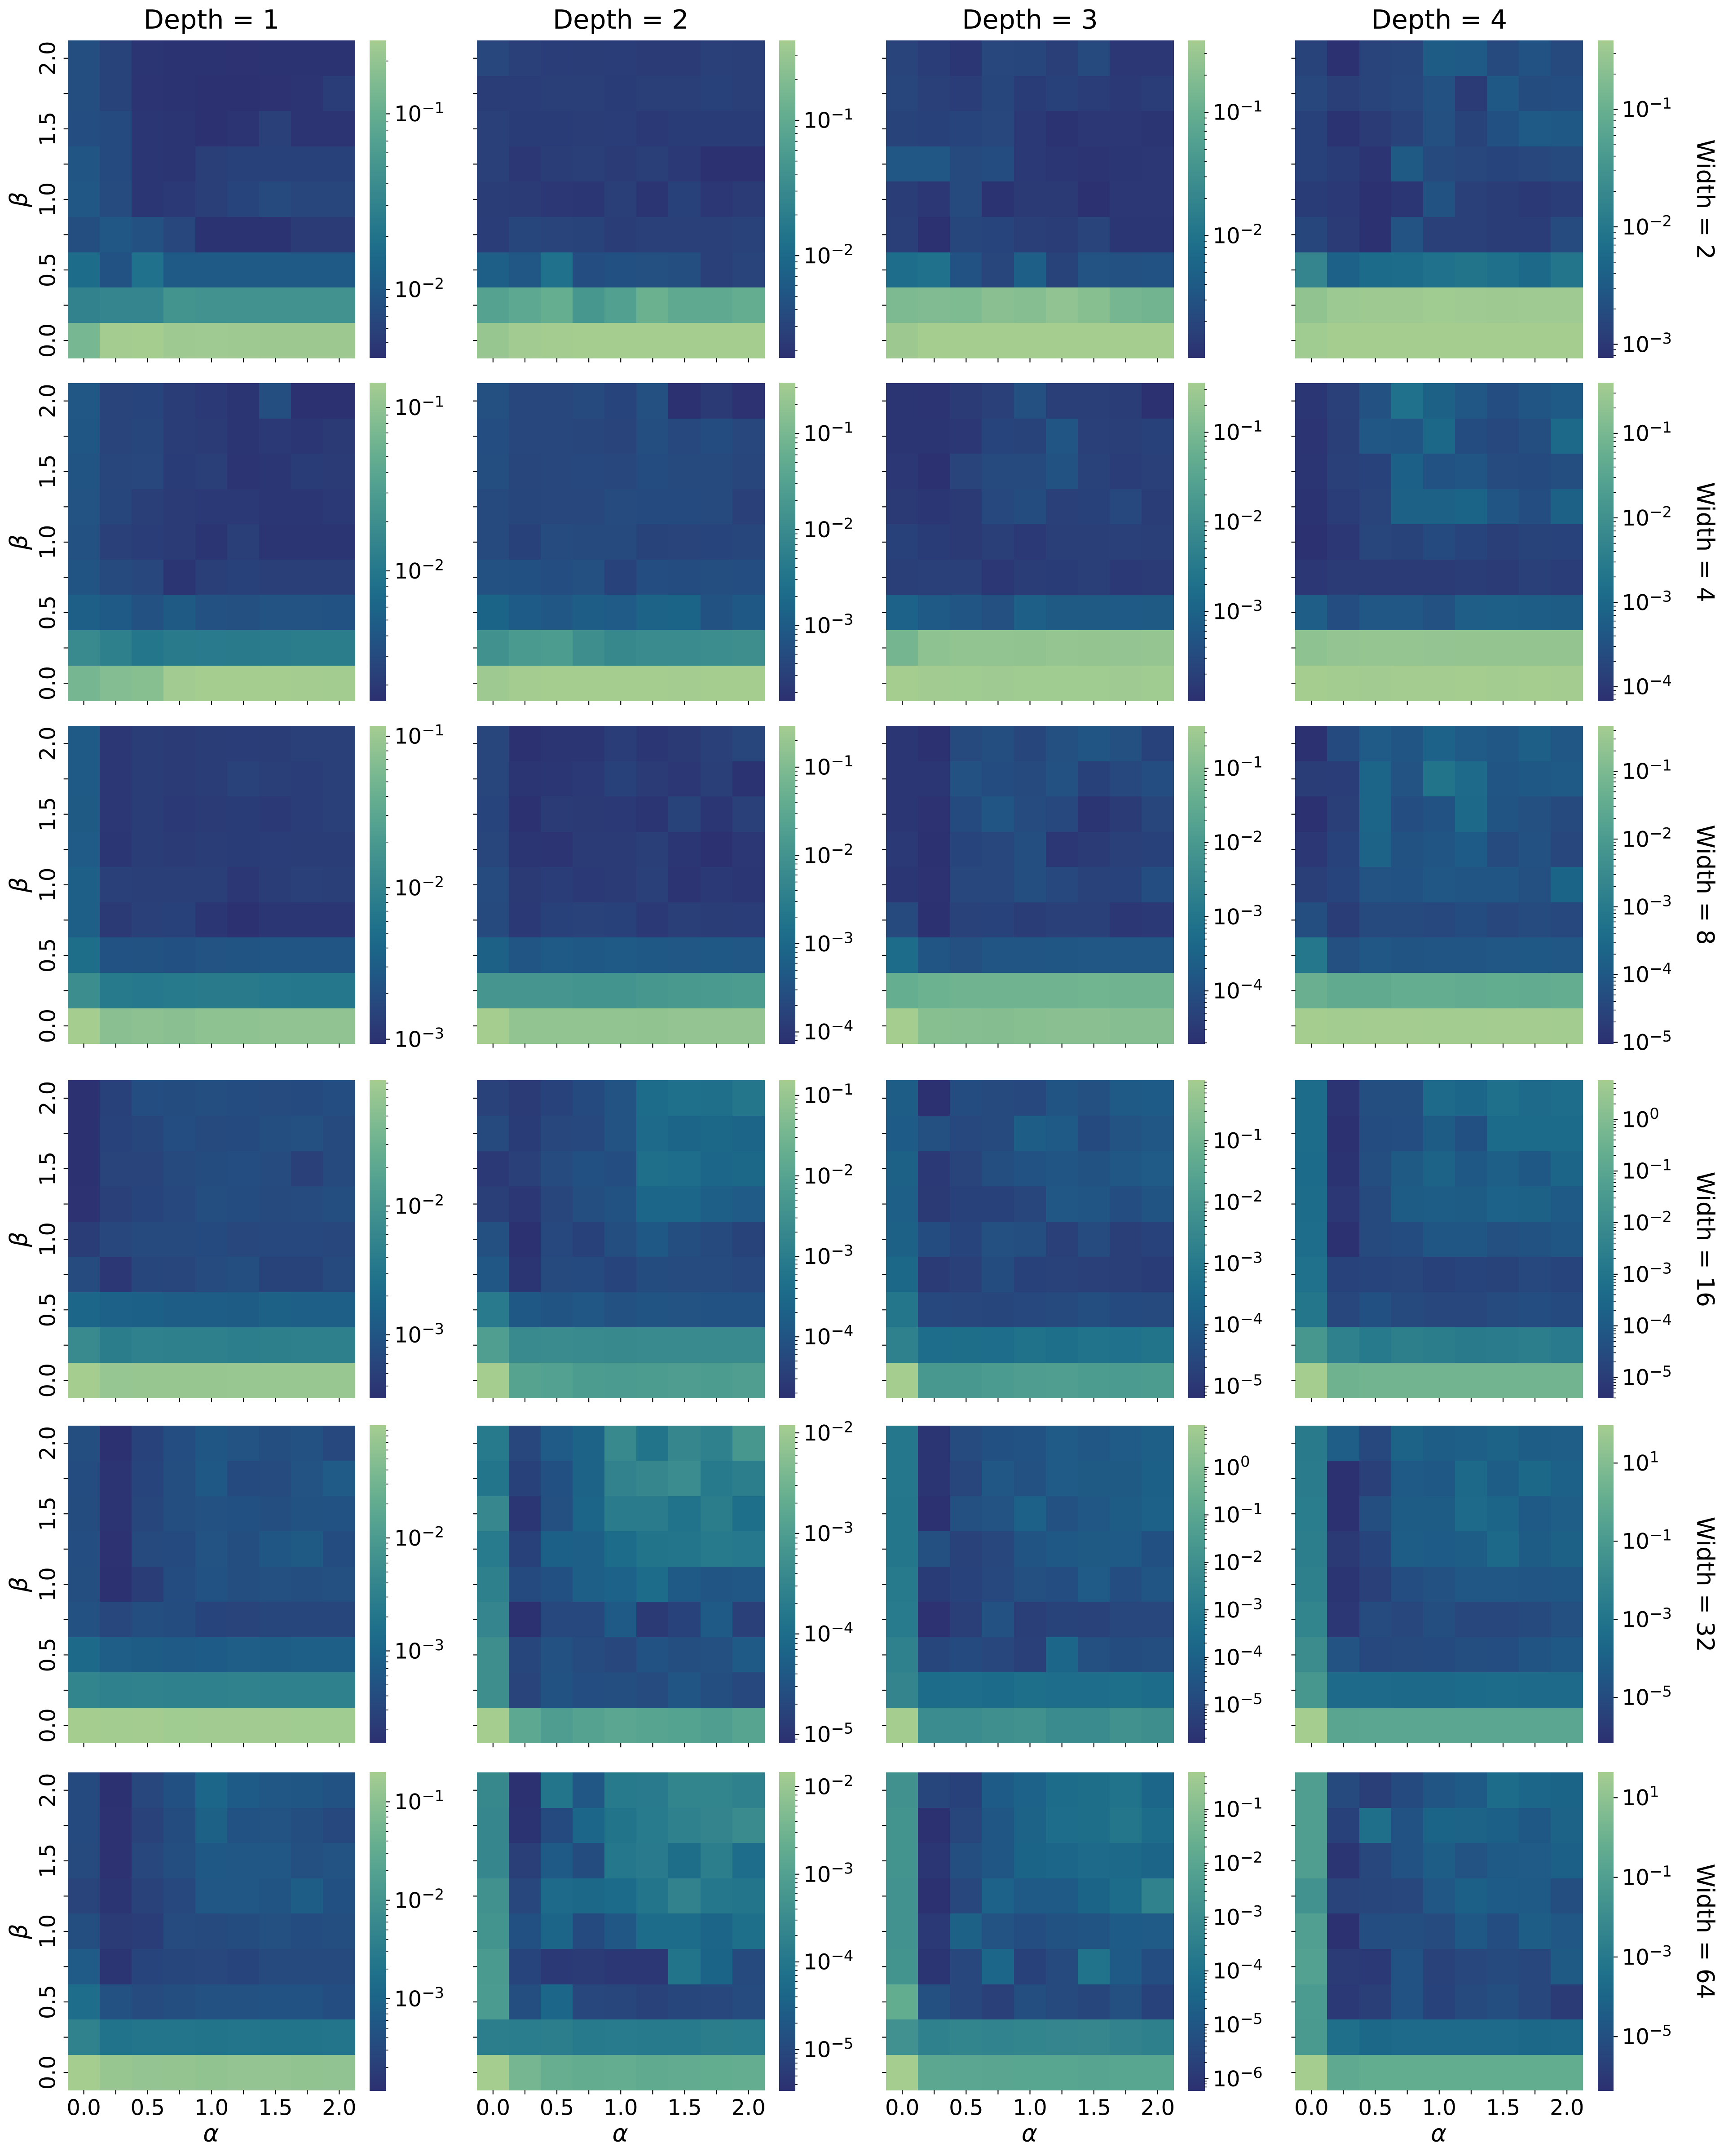

Supplement: supplementary_material [file G10_f5.pdf › supplementary_plots/G10_f5.pdf]

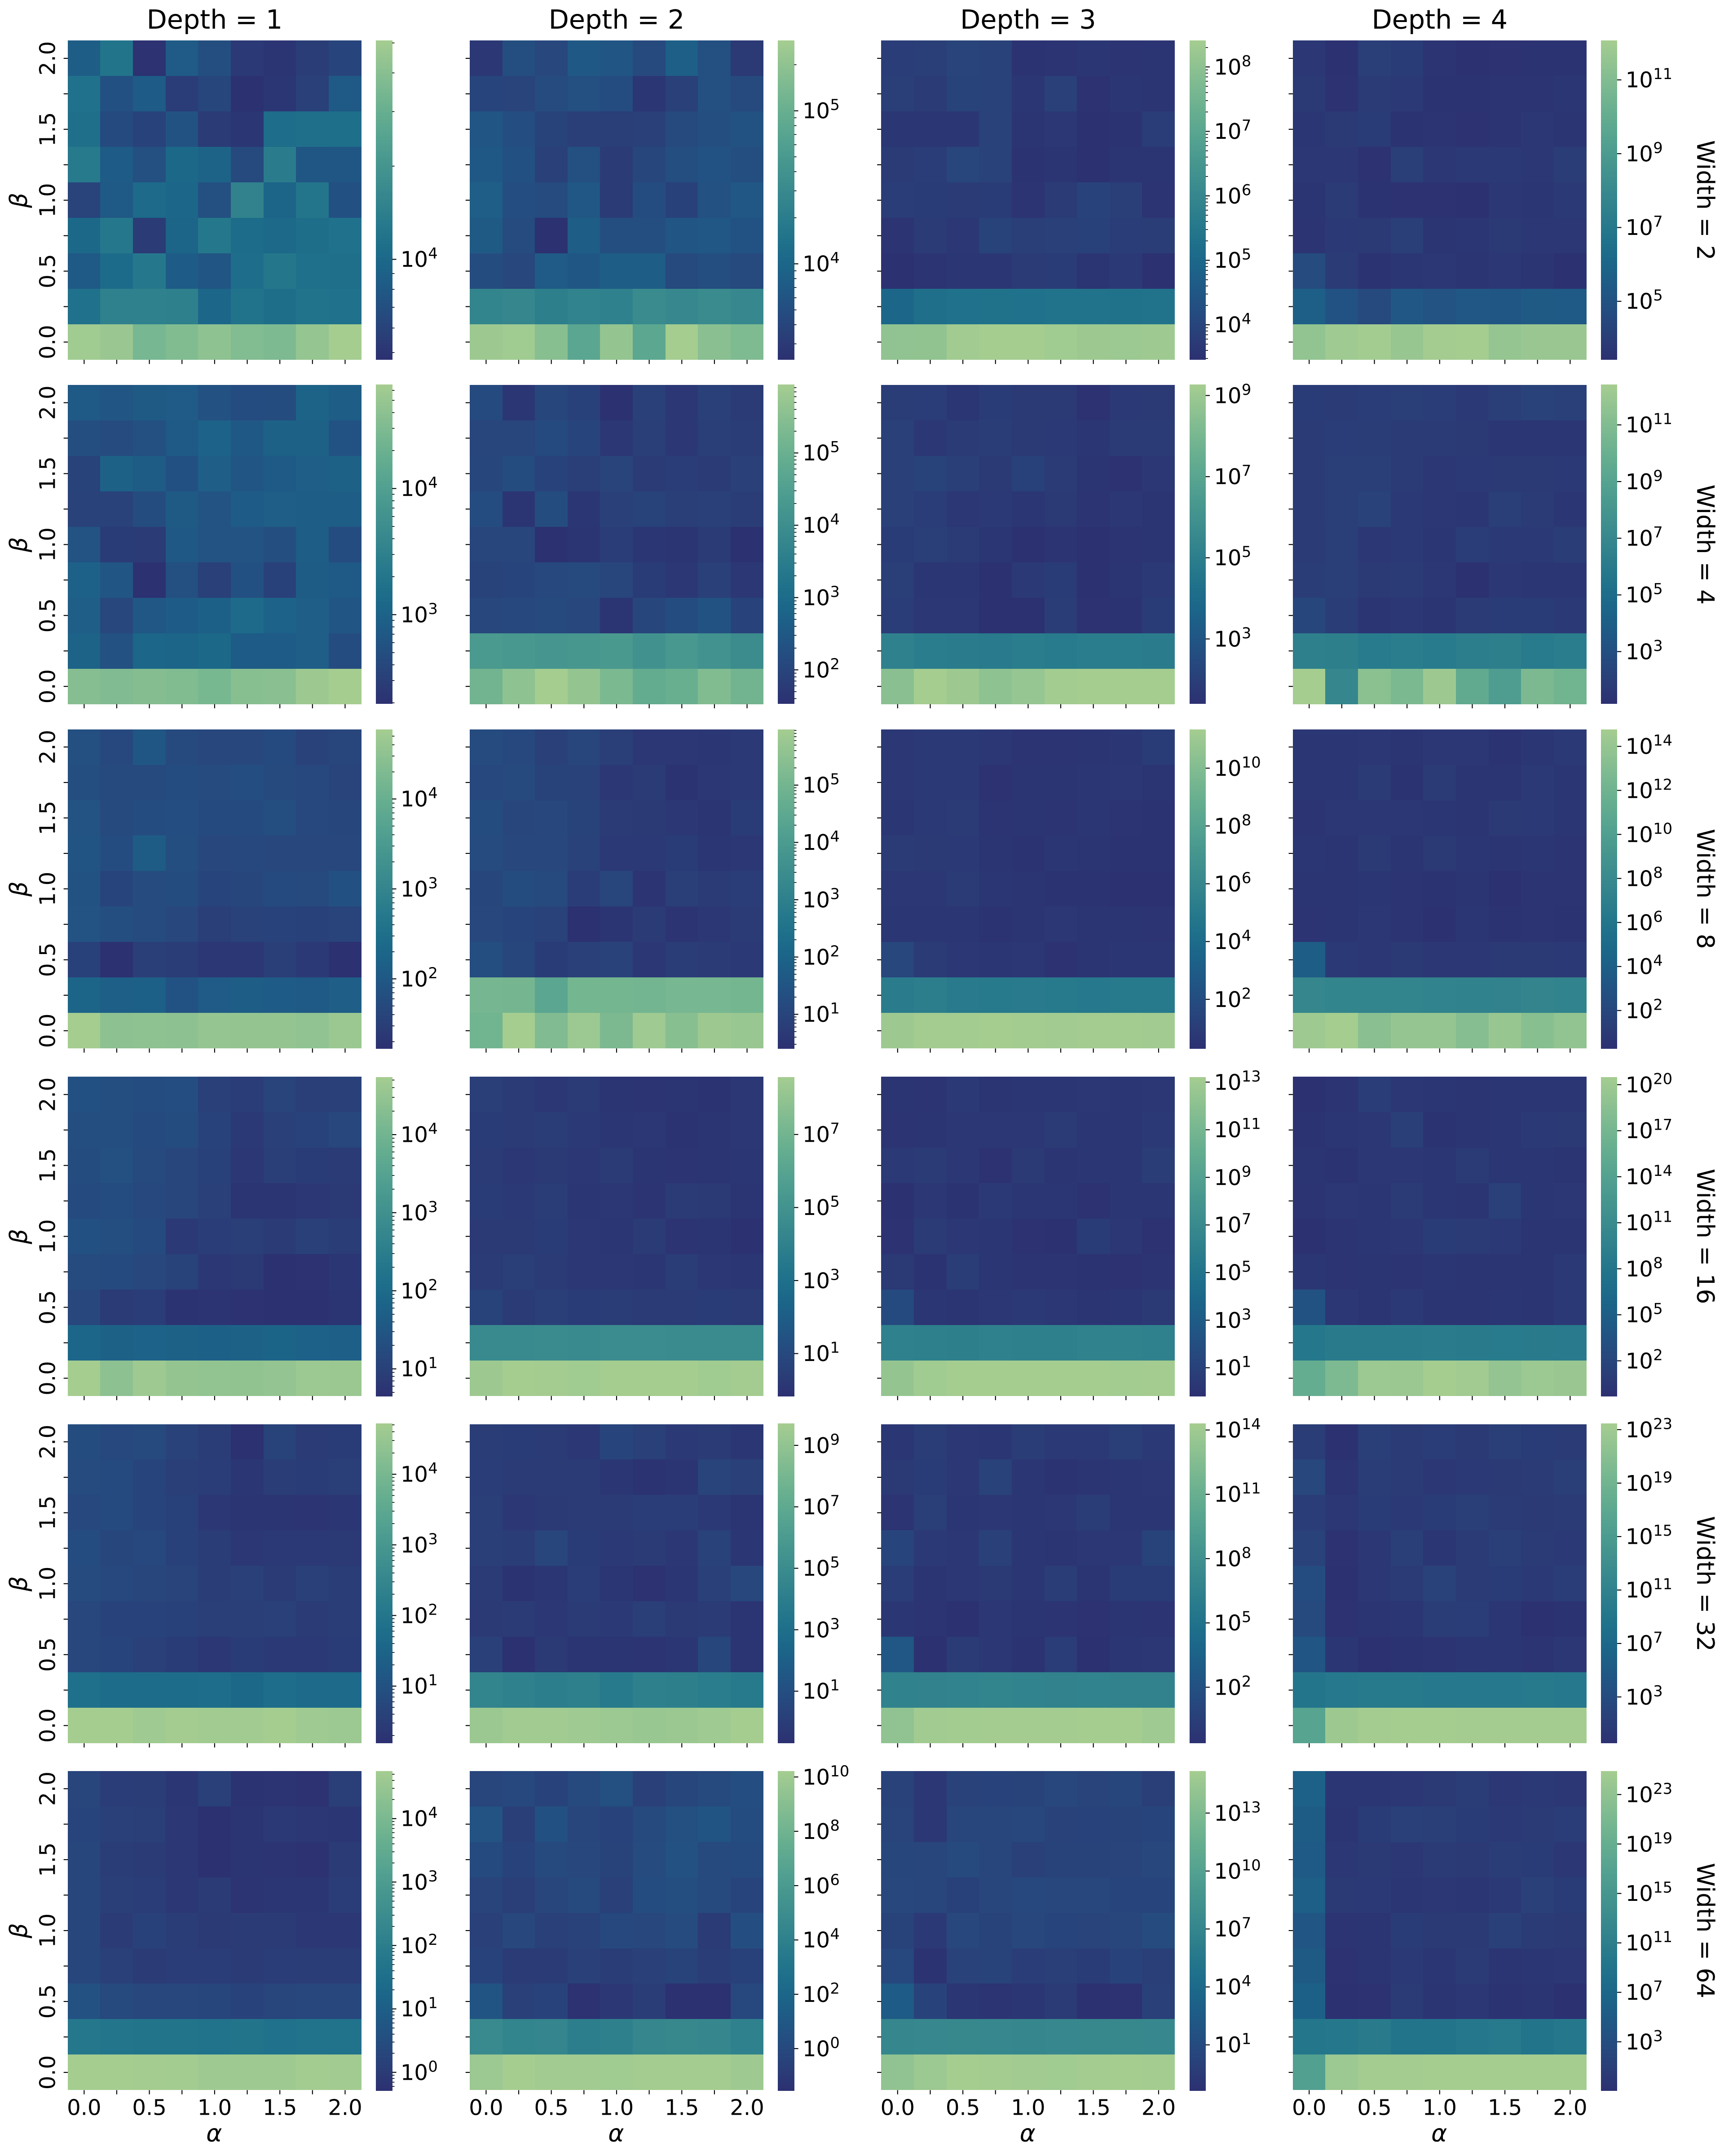

Supplement: supplementary_material [file G10_helmholtz.pdf › supplementary_plots/G10_helmholtz.pdf]

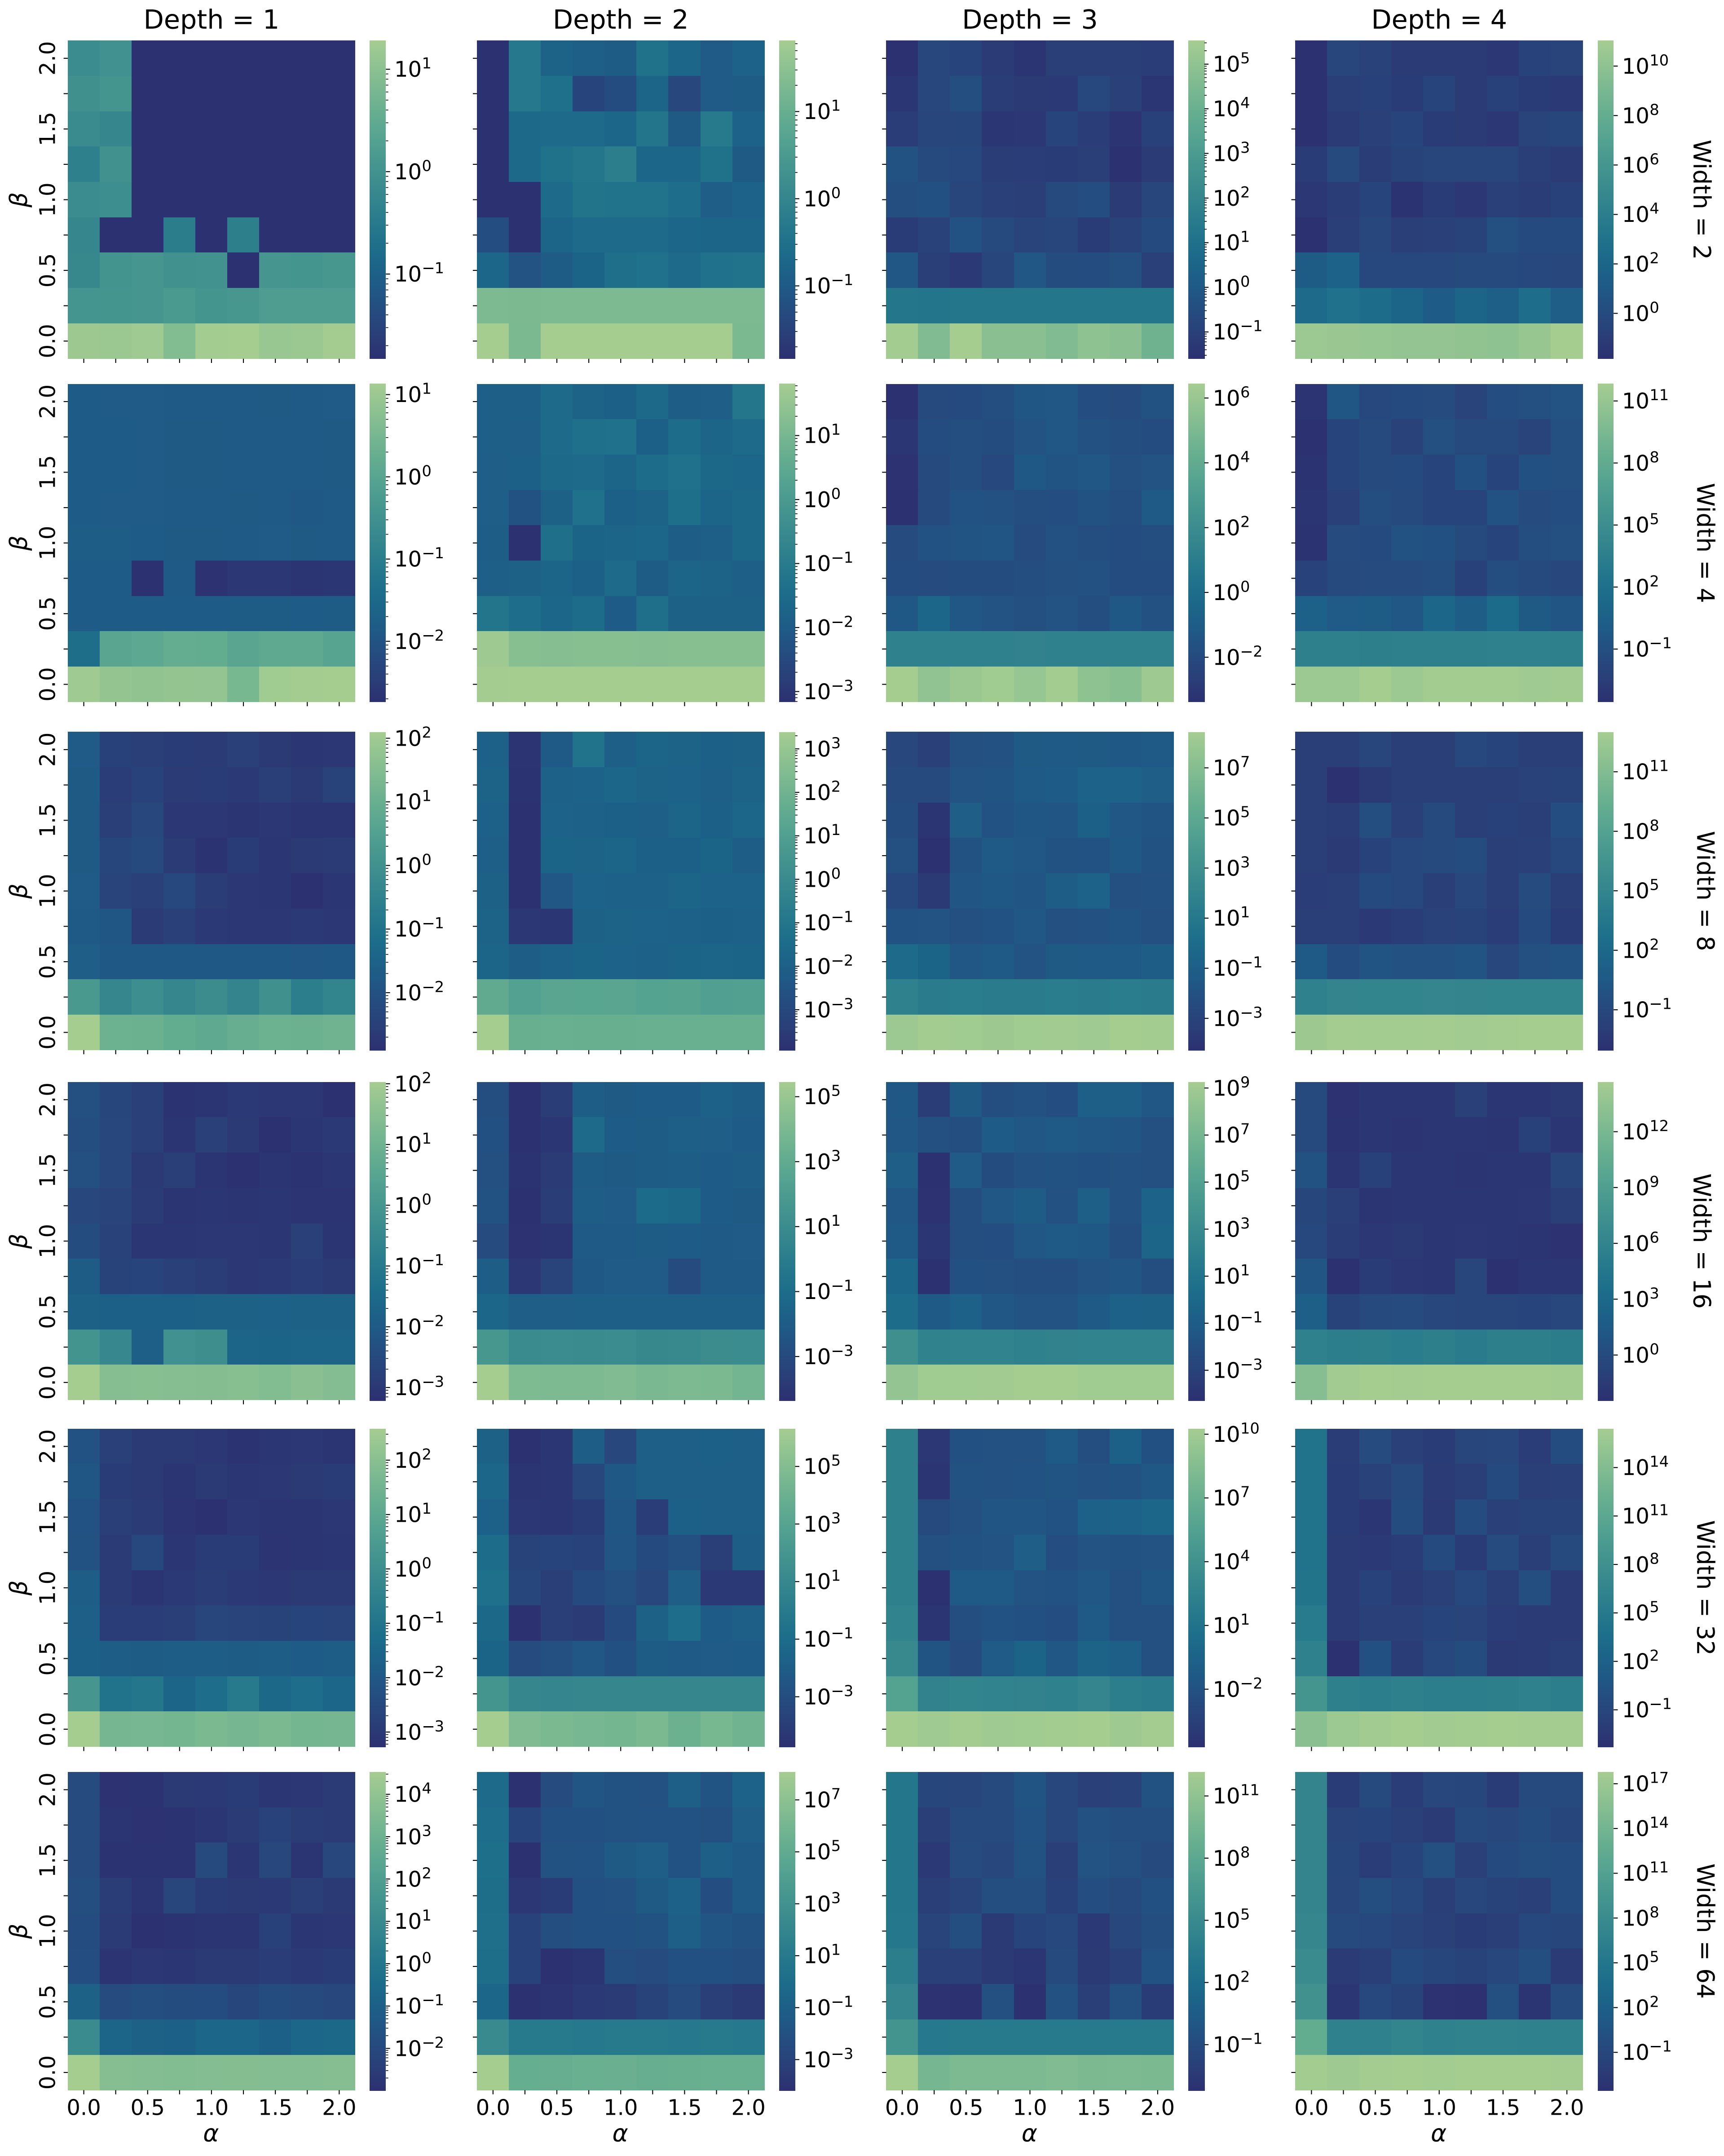

Supplement: supplementary_material [file G20_ac.pdf › supplementary_plots/G20_ac.pdf]

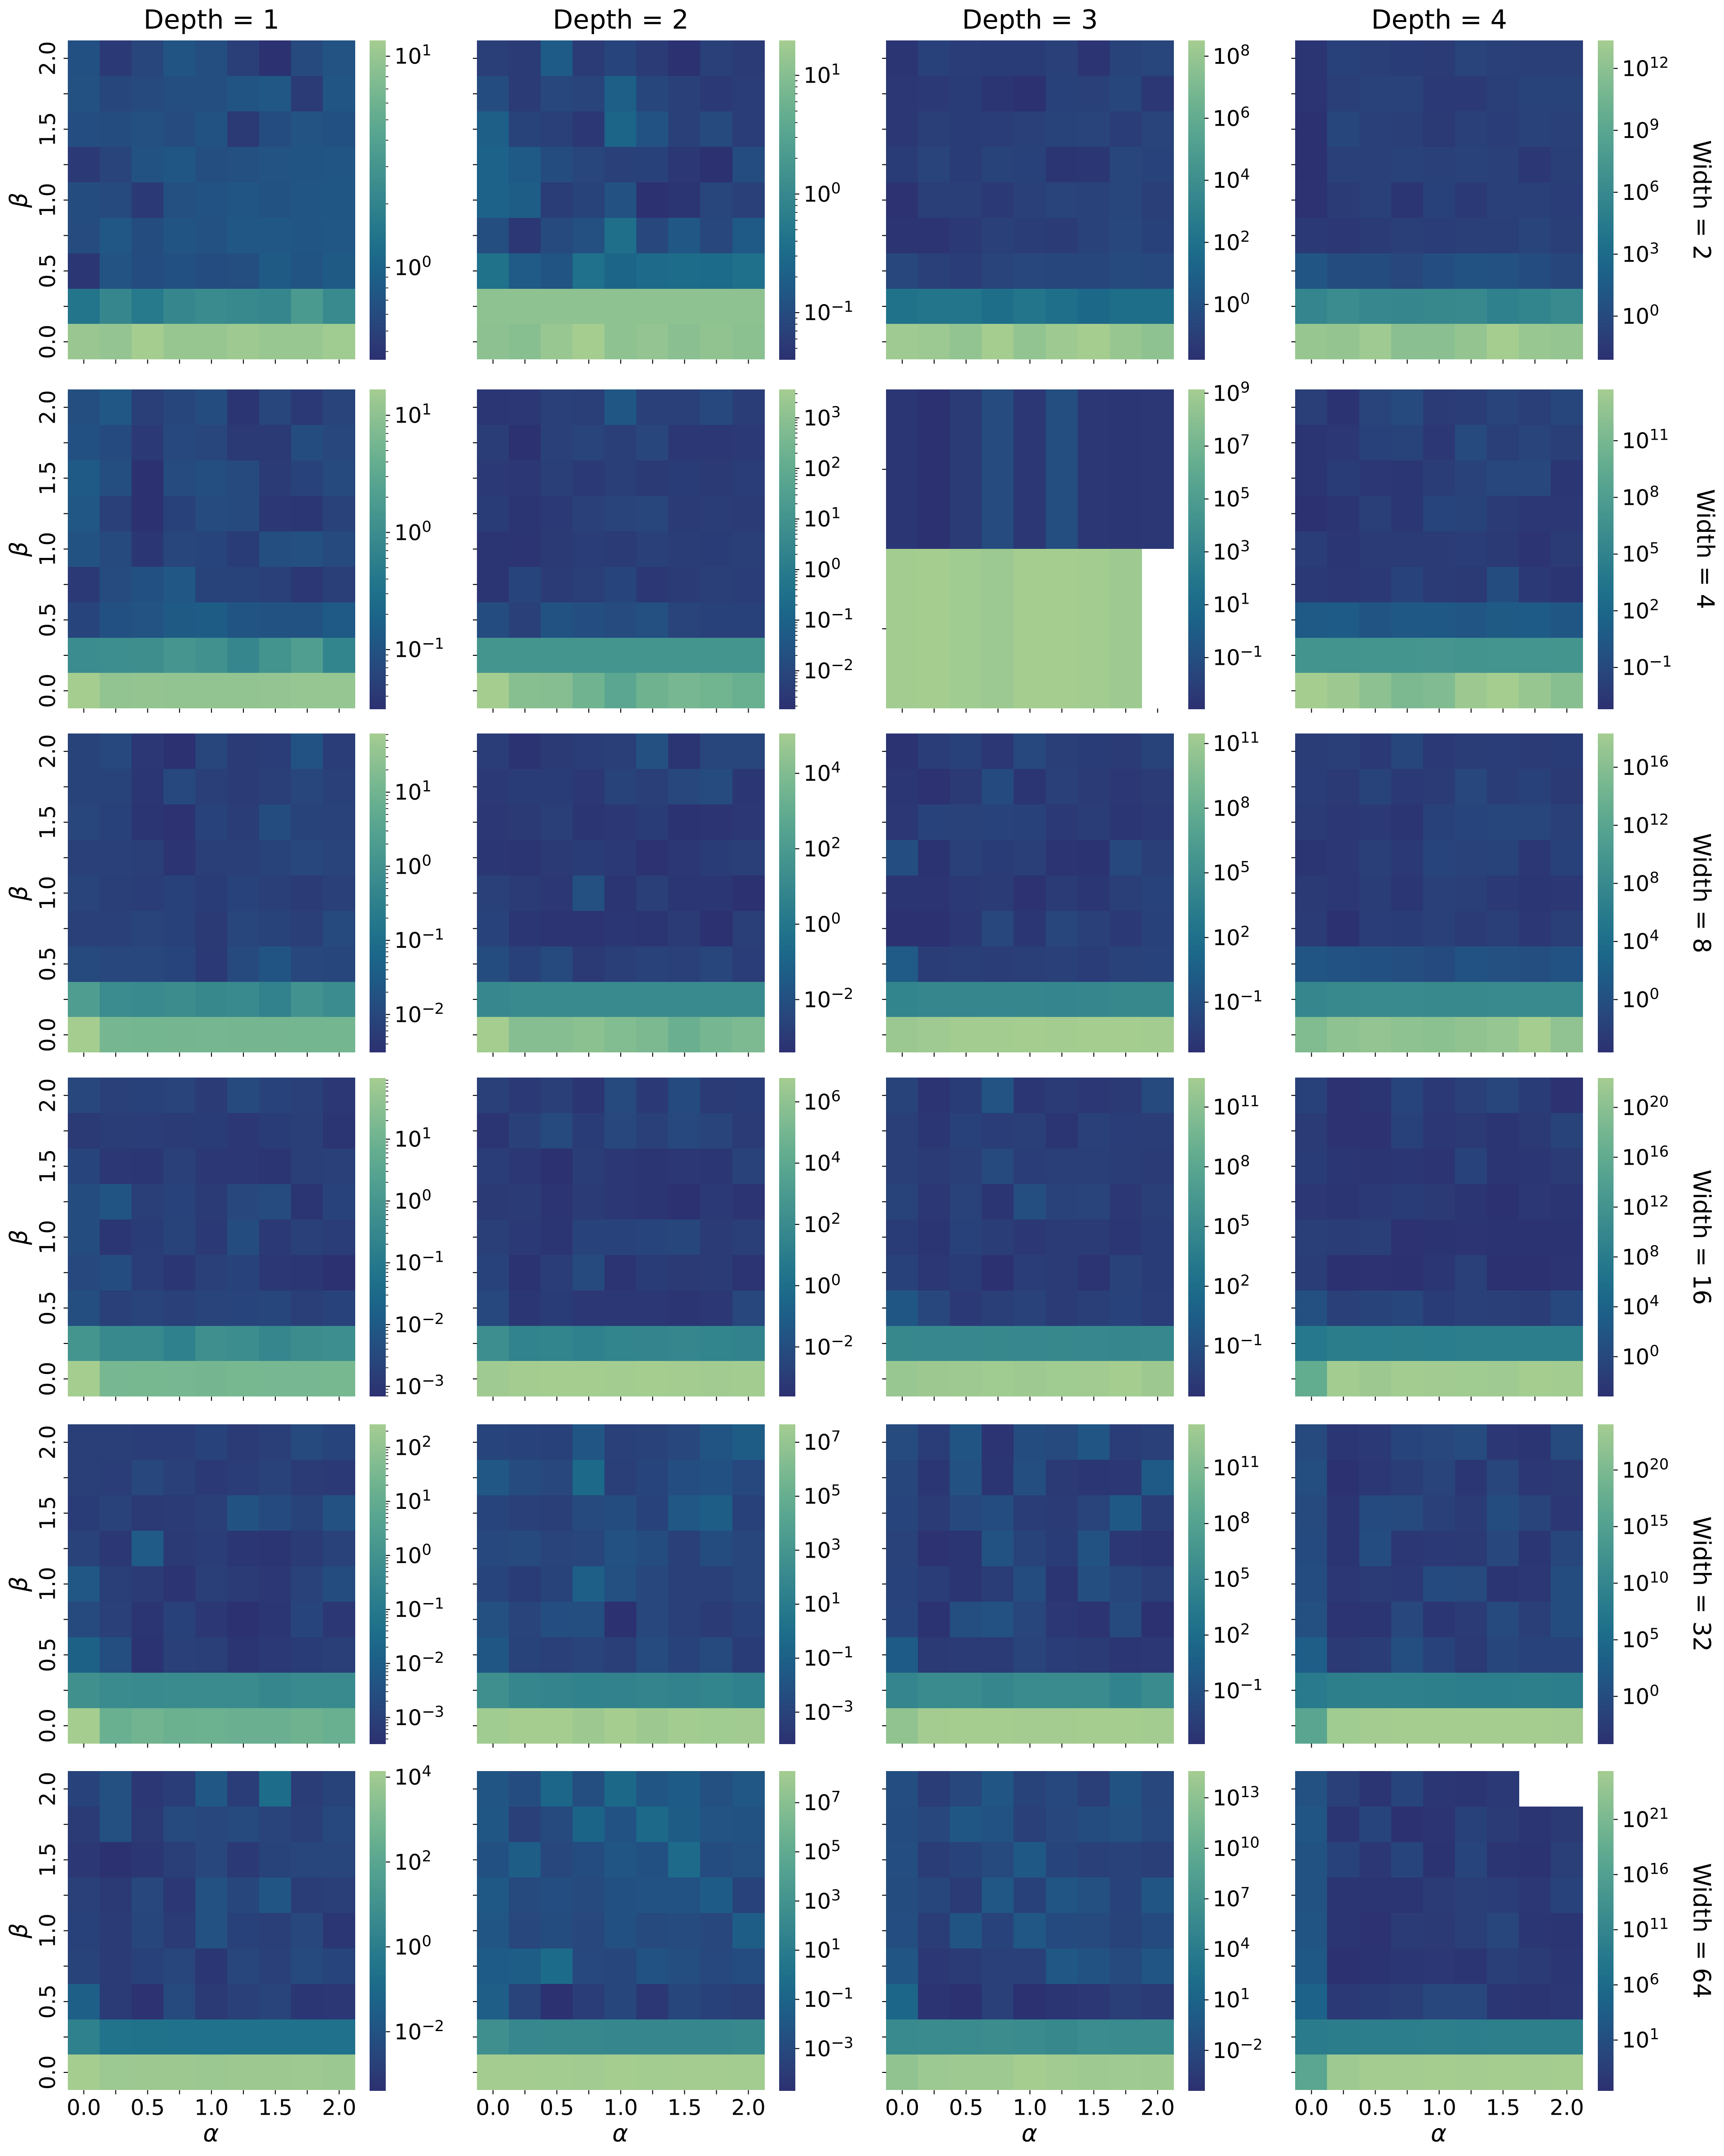

Supplement: supplementary_material [file G20_burgers.pdf › supplementary_plots/G20_burgers.pdf]

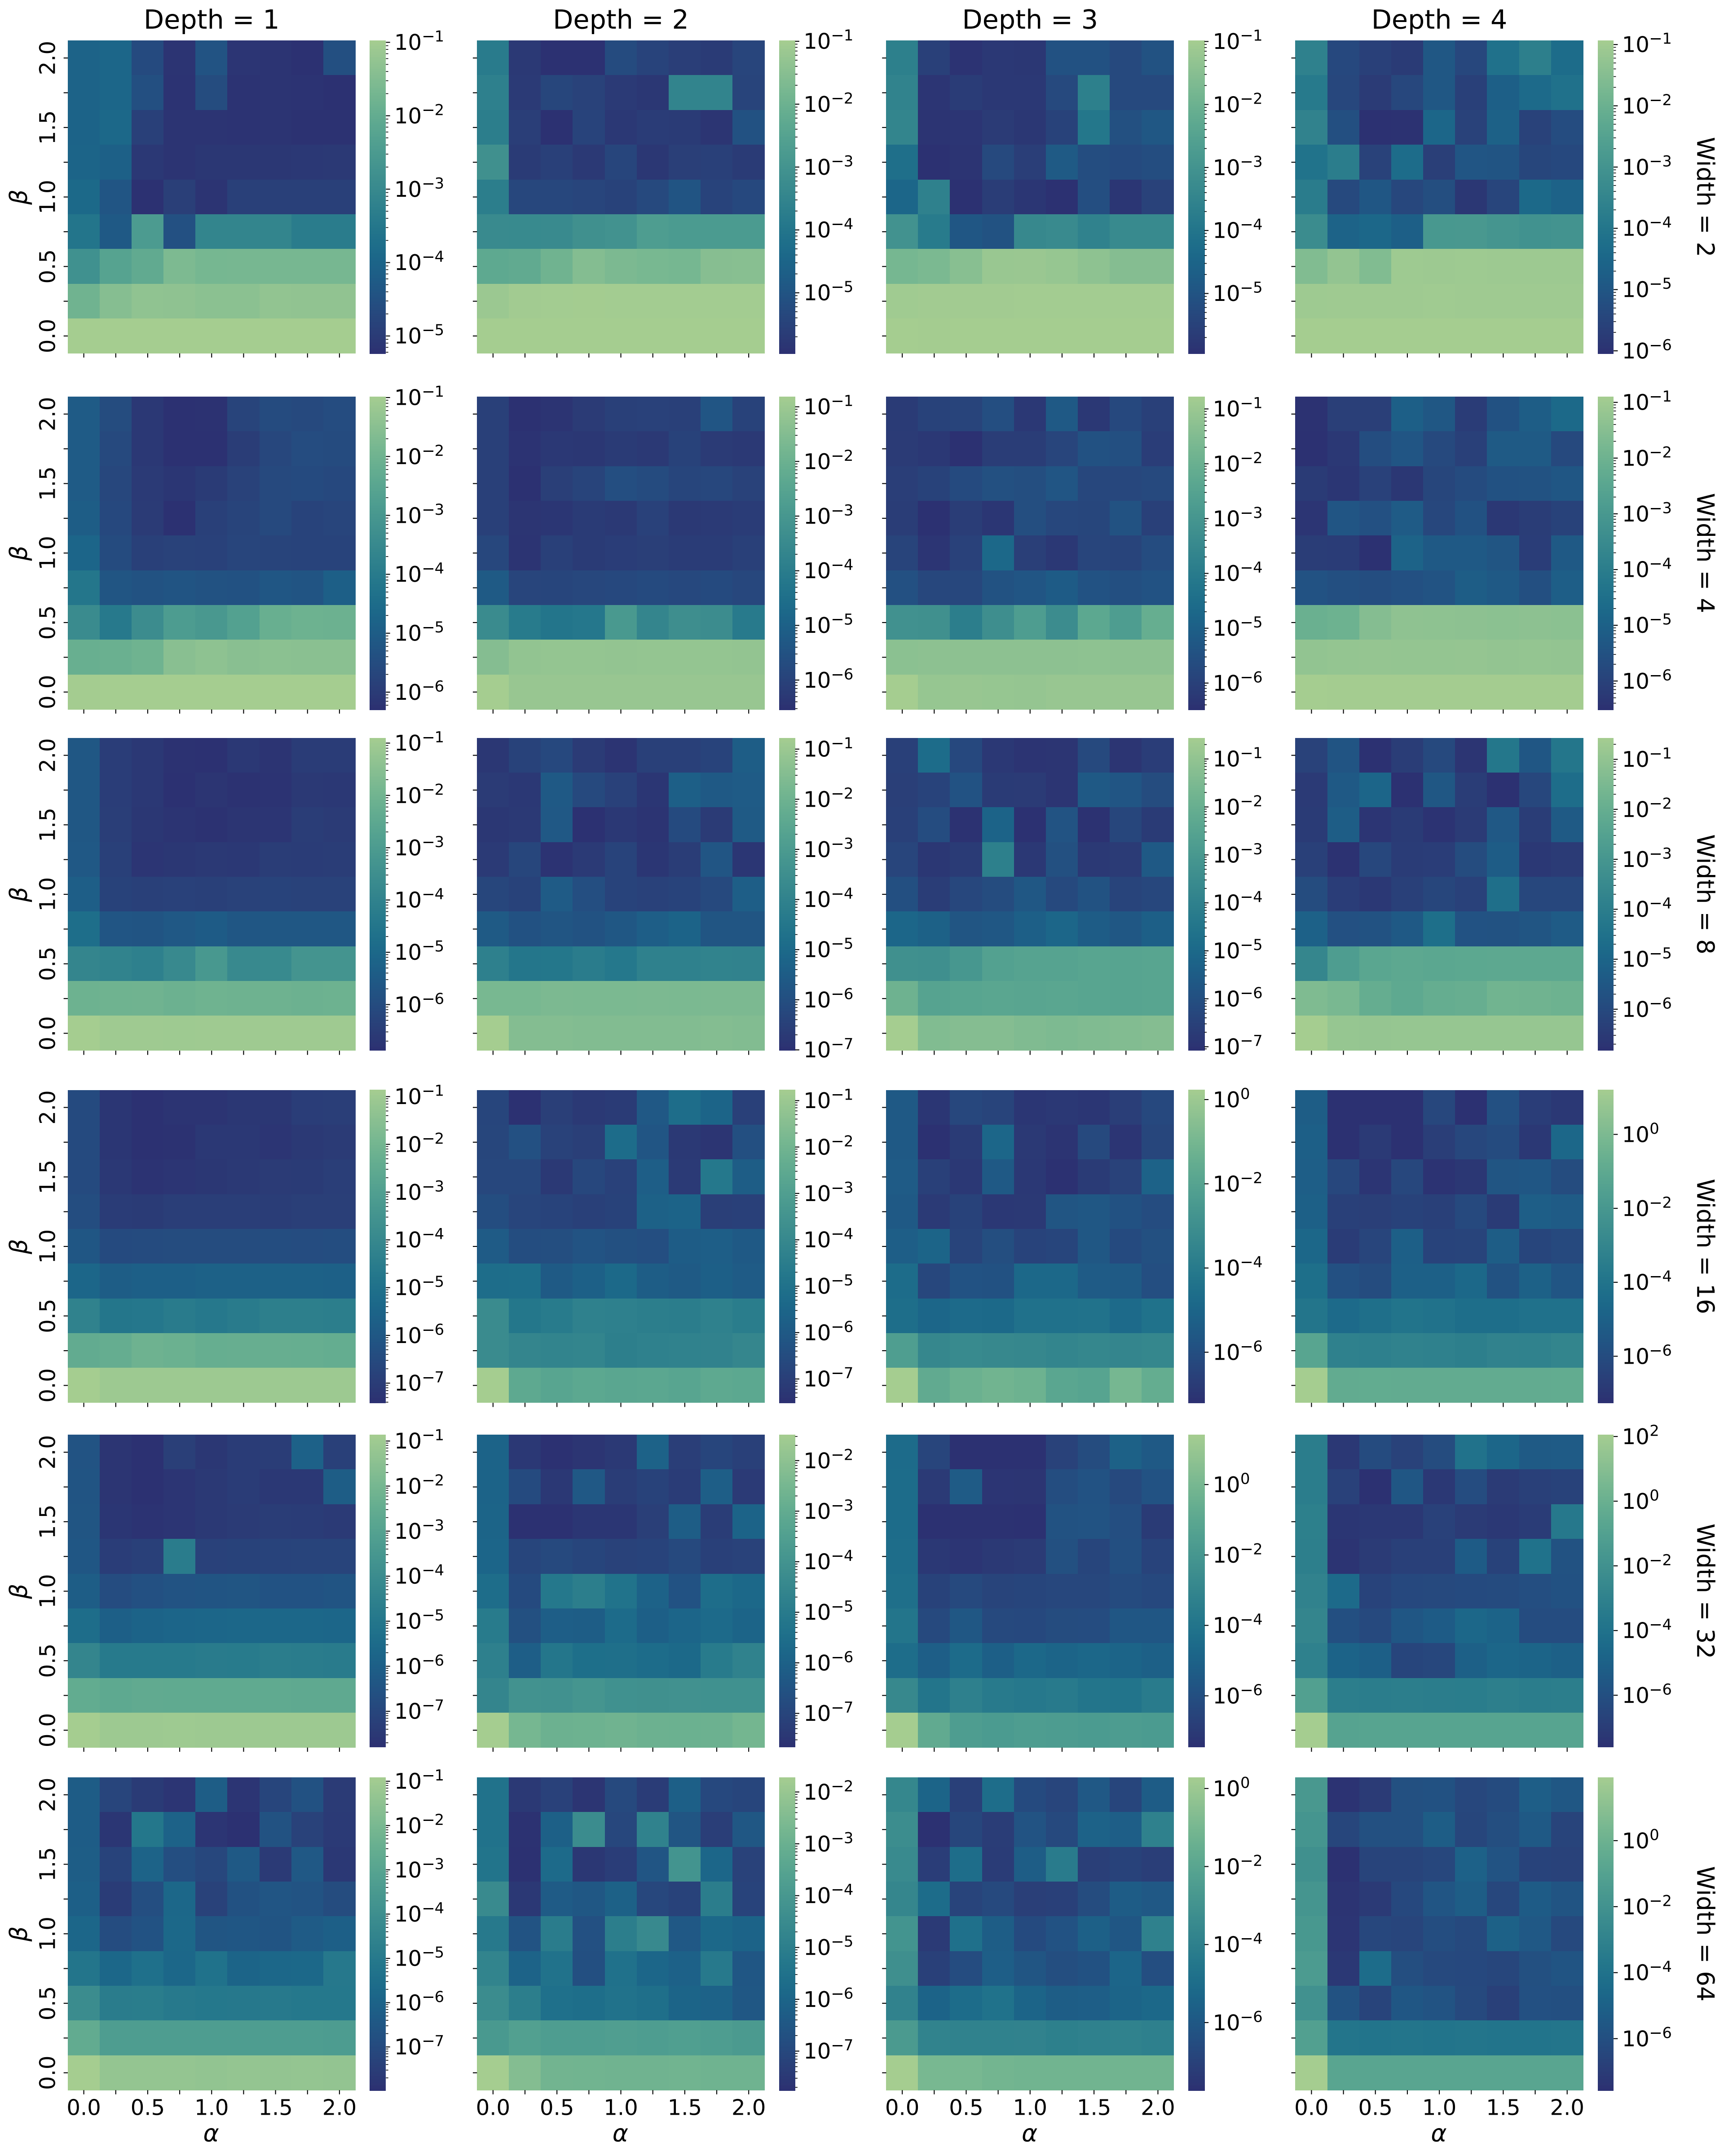

Supplement: supplementary_material [file G20_f1.pdf › supplementary_plots/G20_f1.pdf]

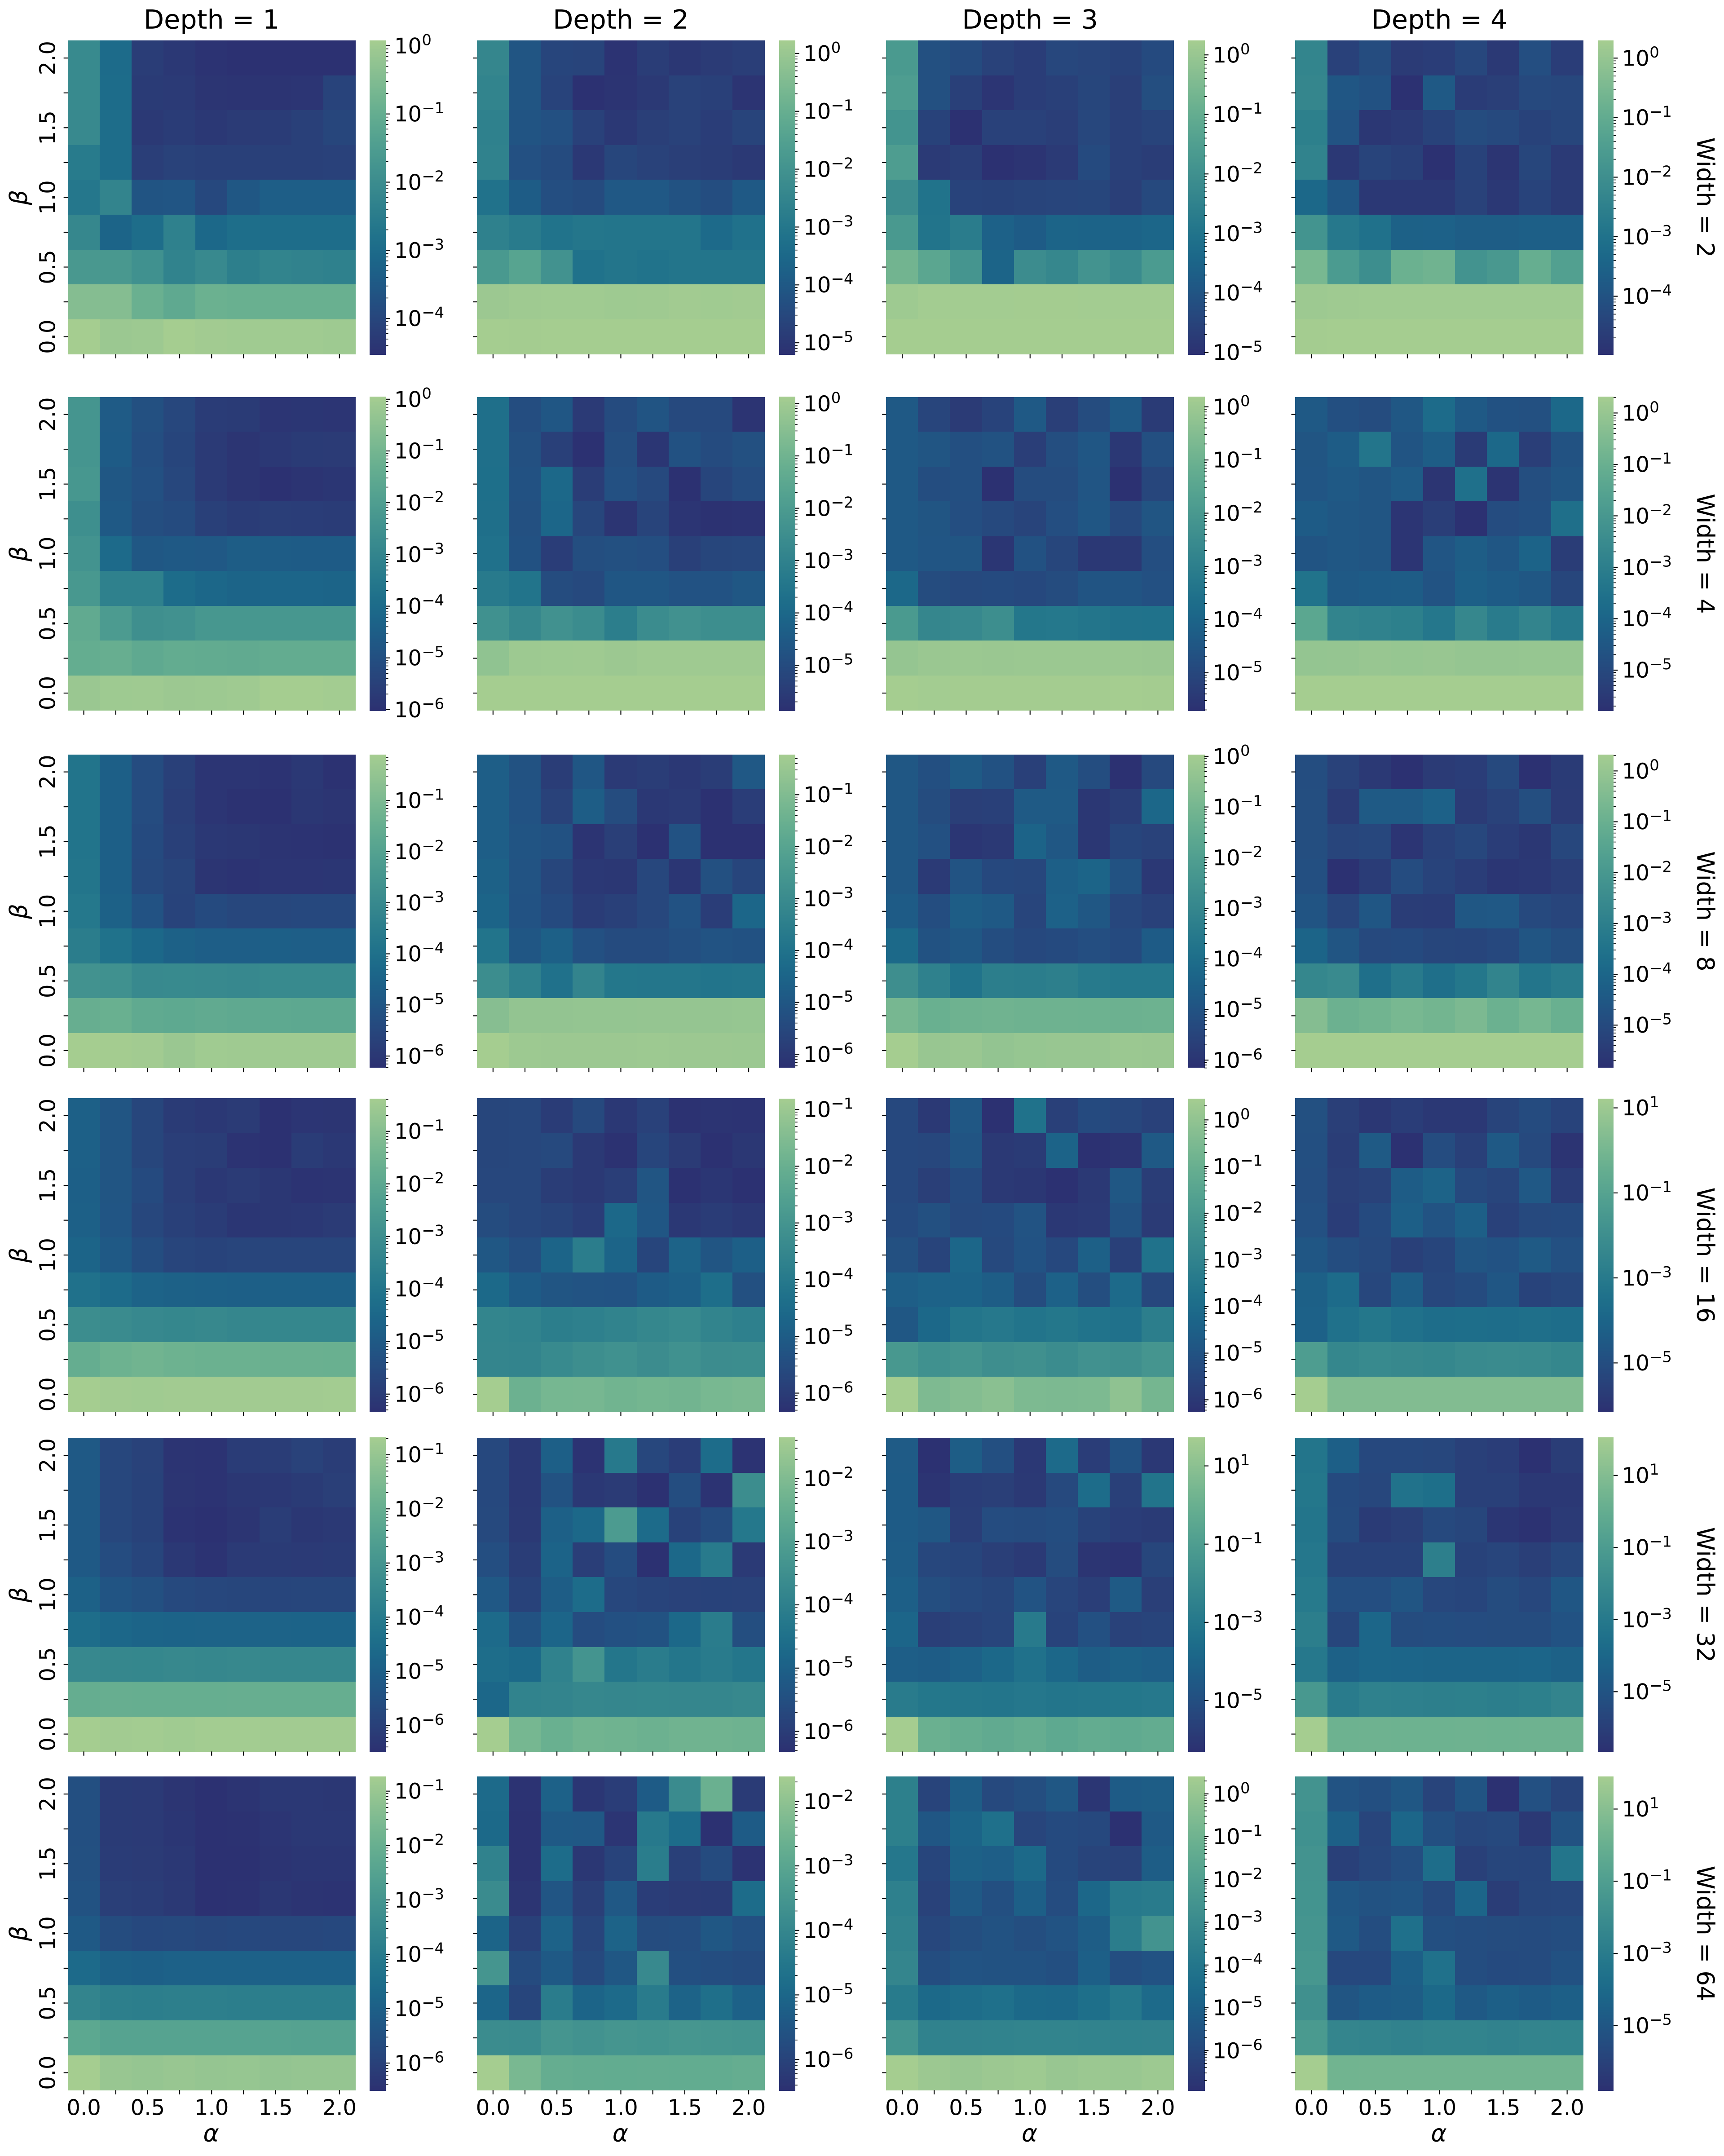

Supplement: supplementary_material [file G20_f2.pdf › supplementary_plots/G20_f2.pdf]

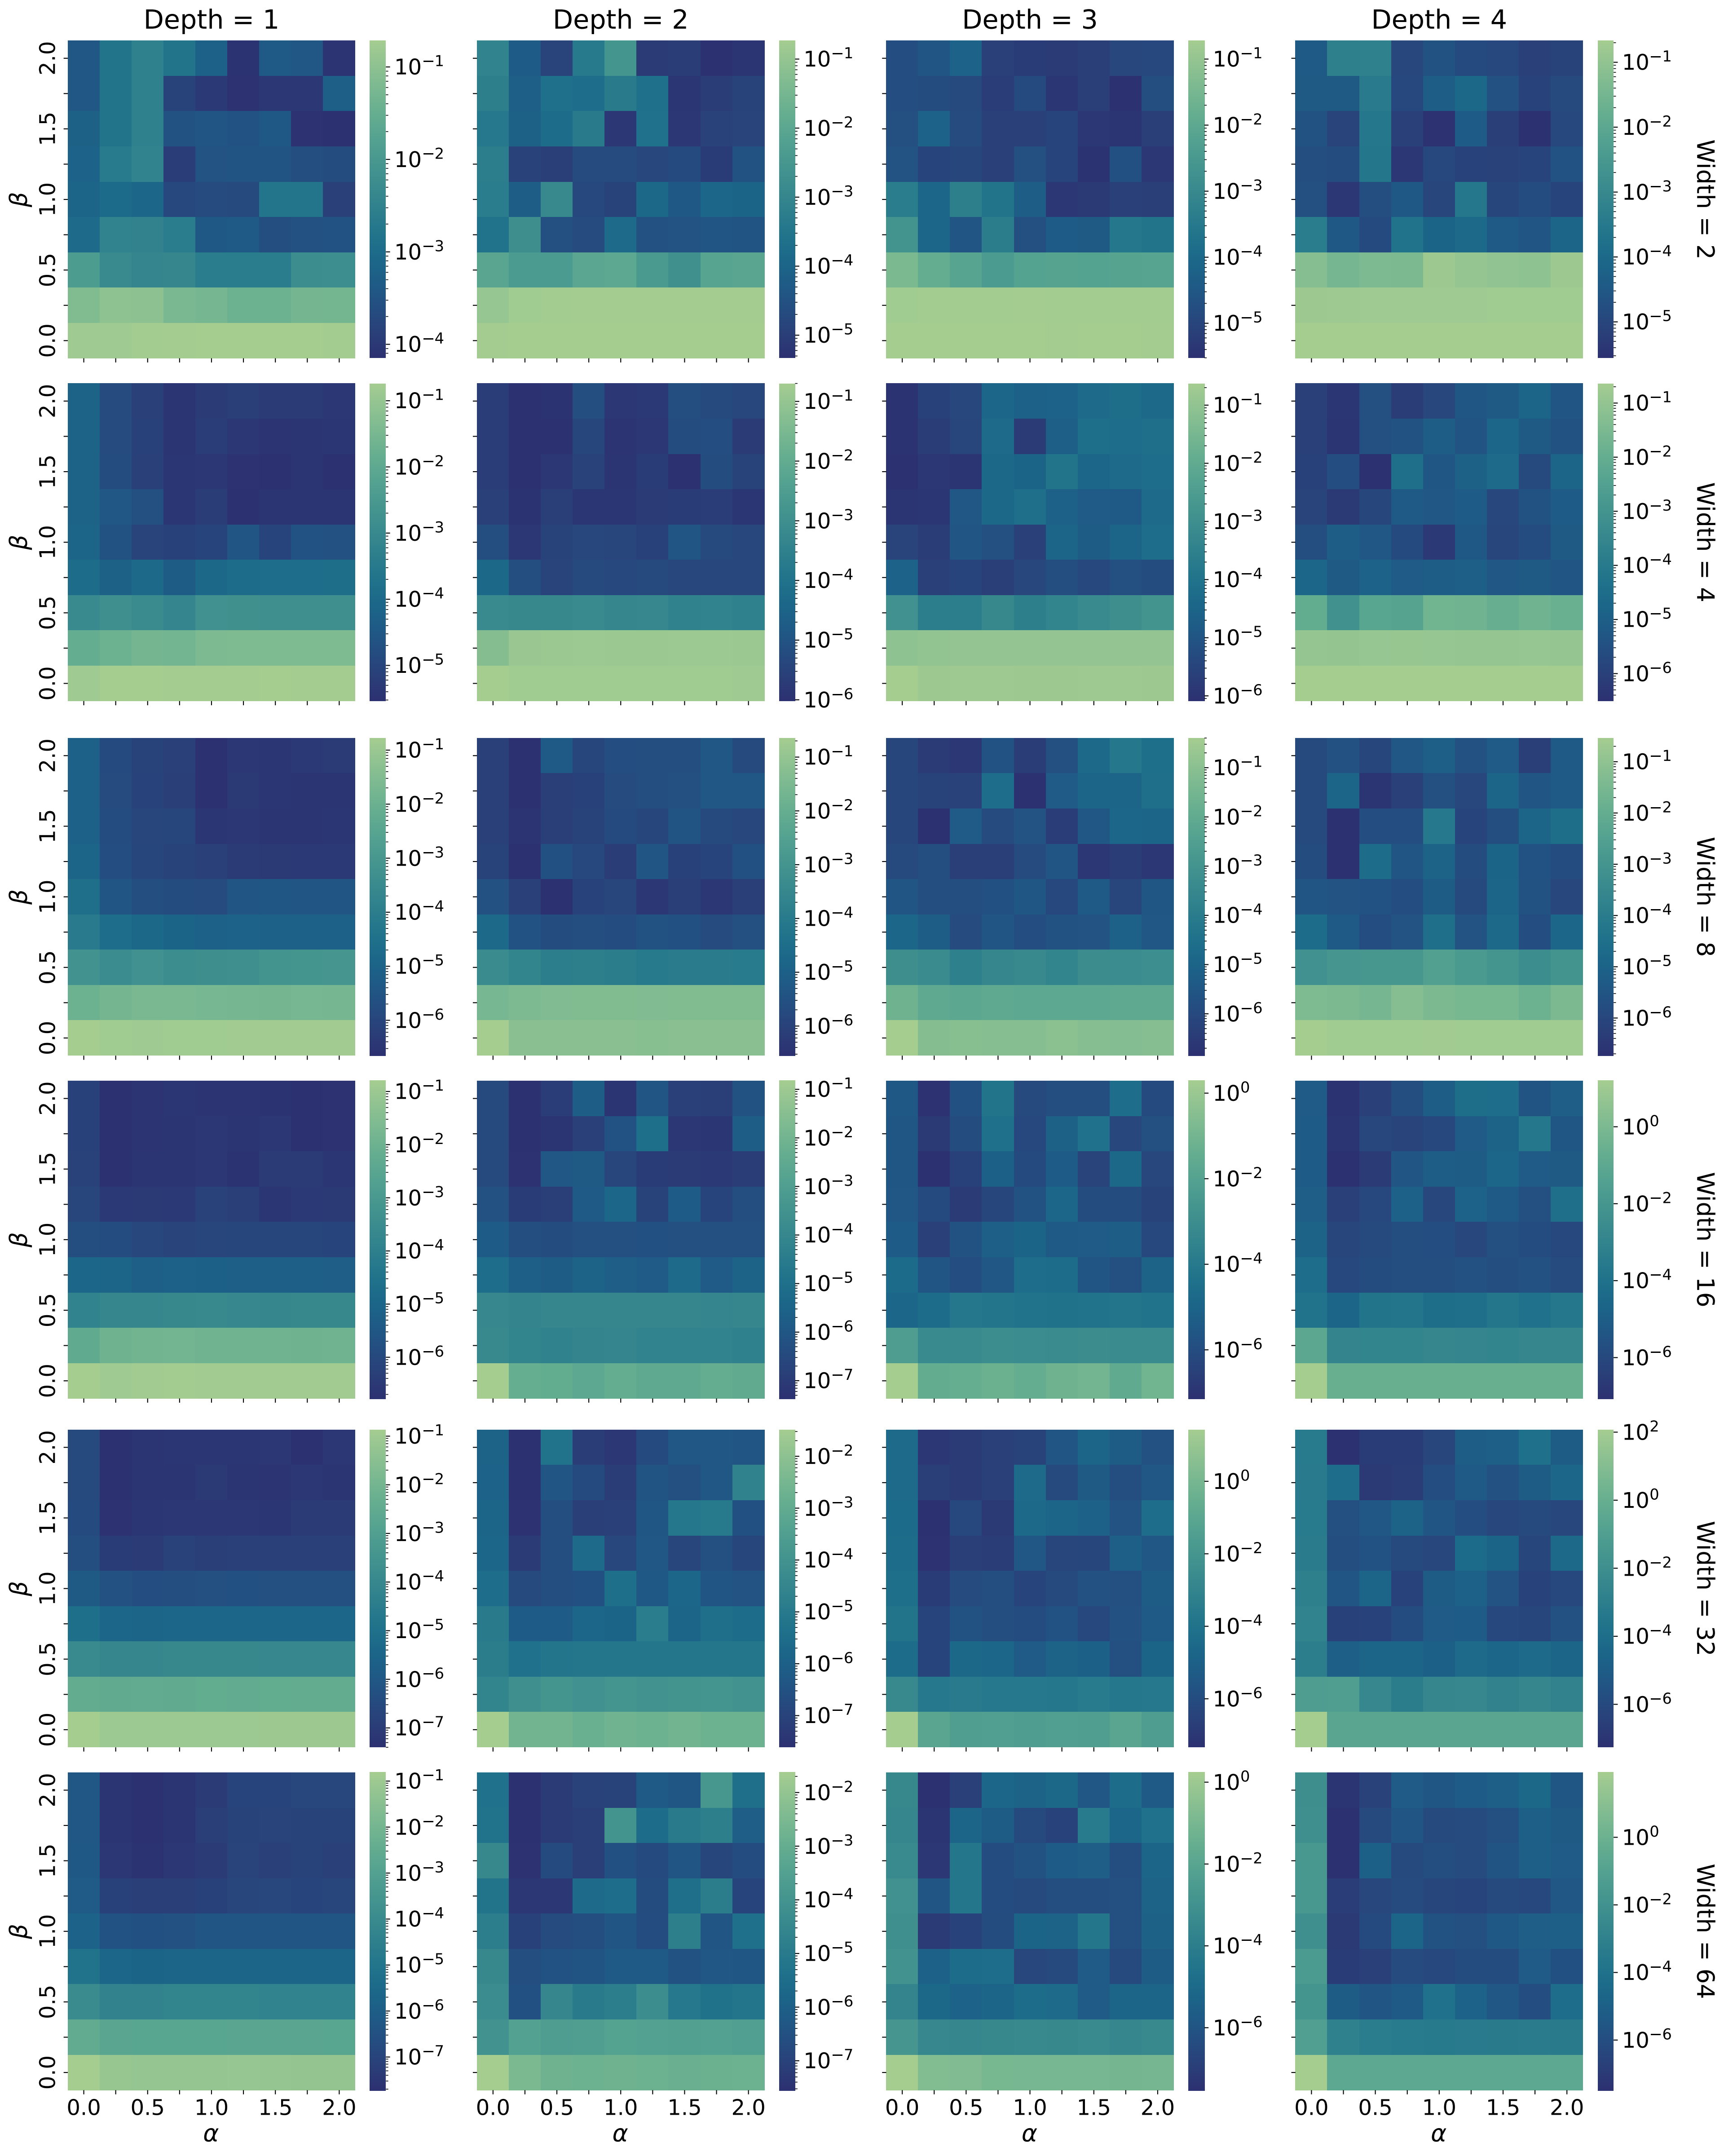

Supplement: supplementary_material [file G20_f3.pdf › supplementary_plots/G20_f3.pdf]

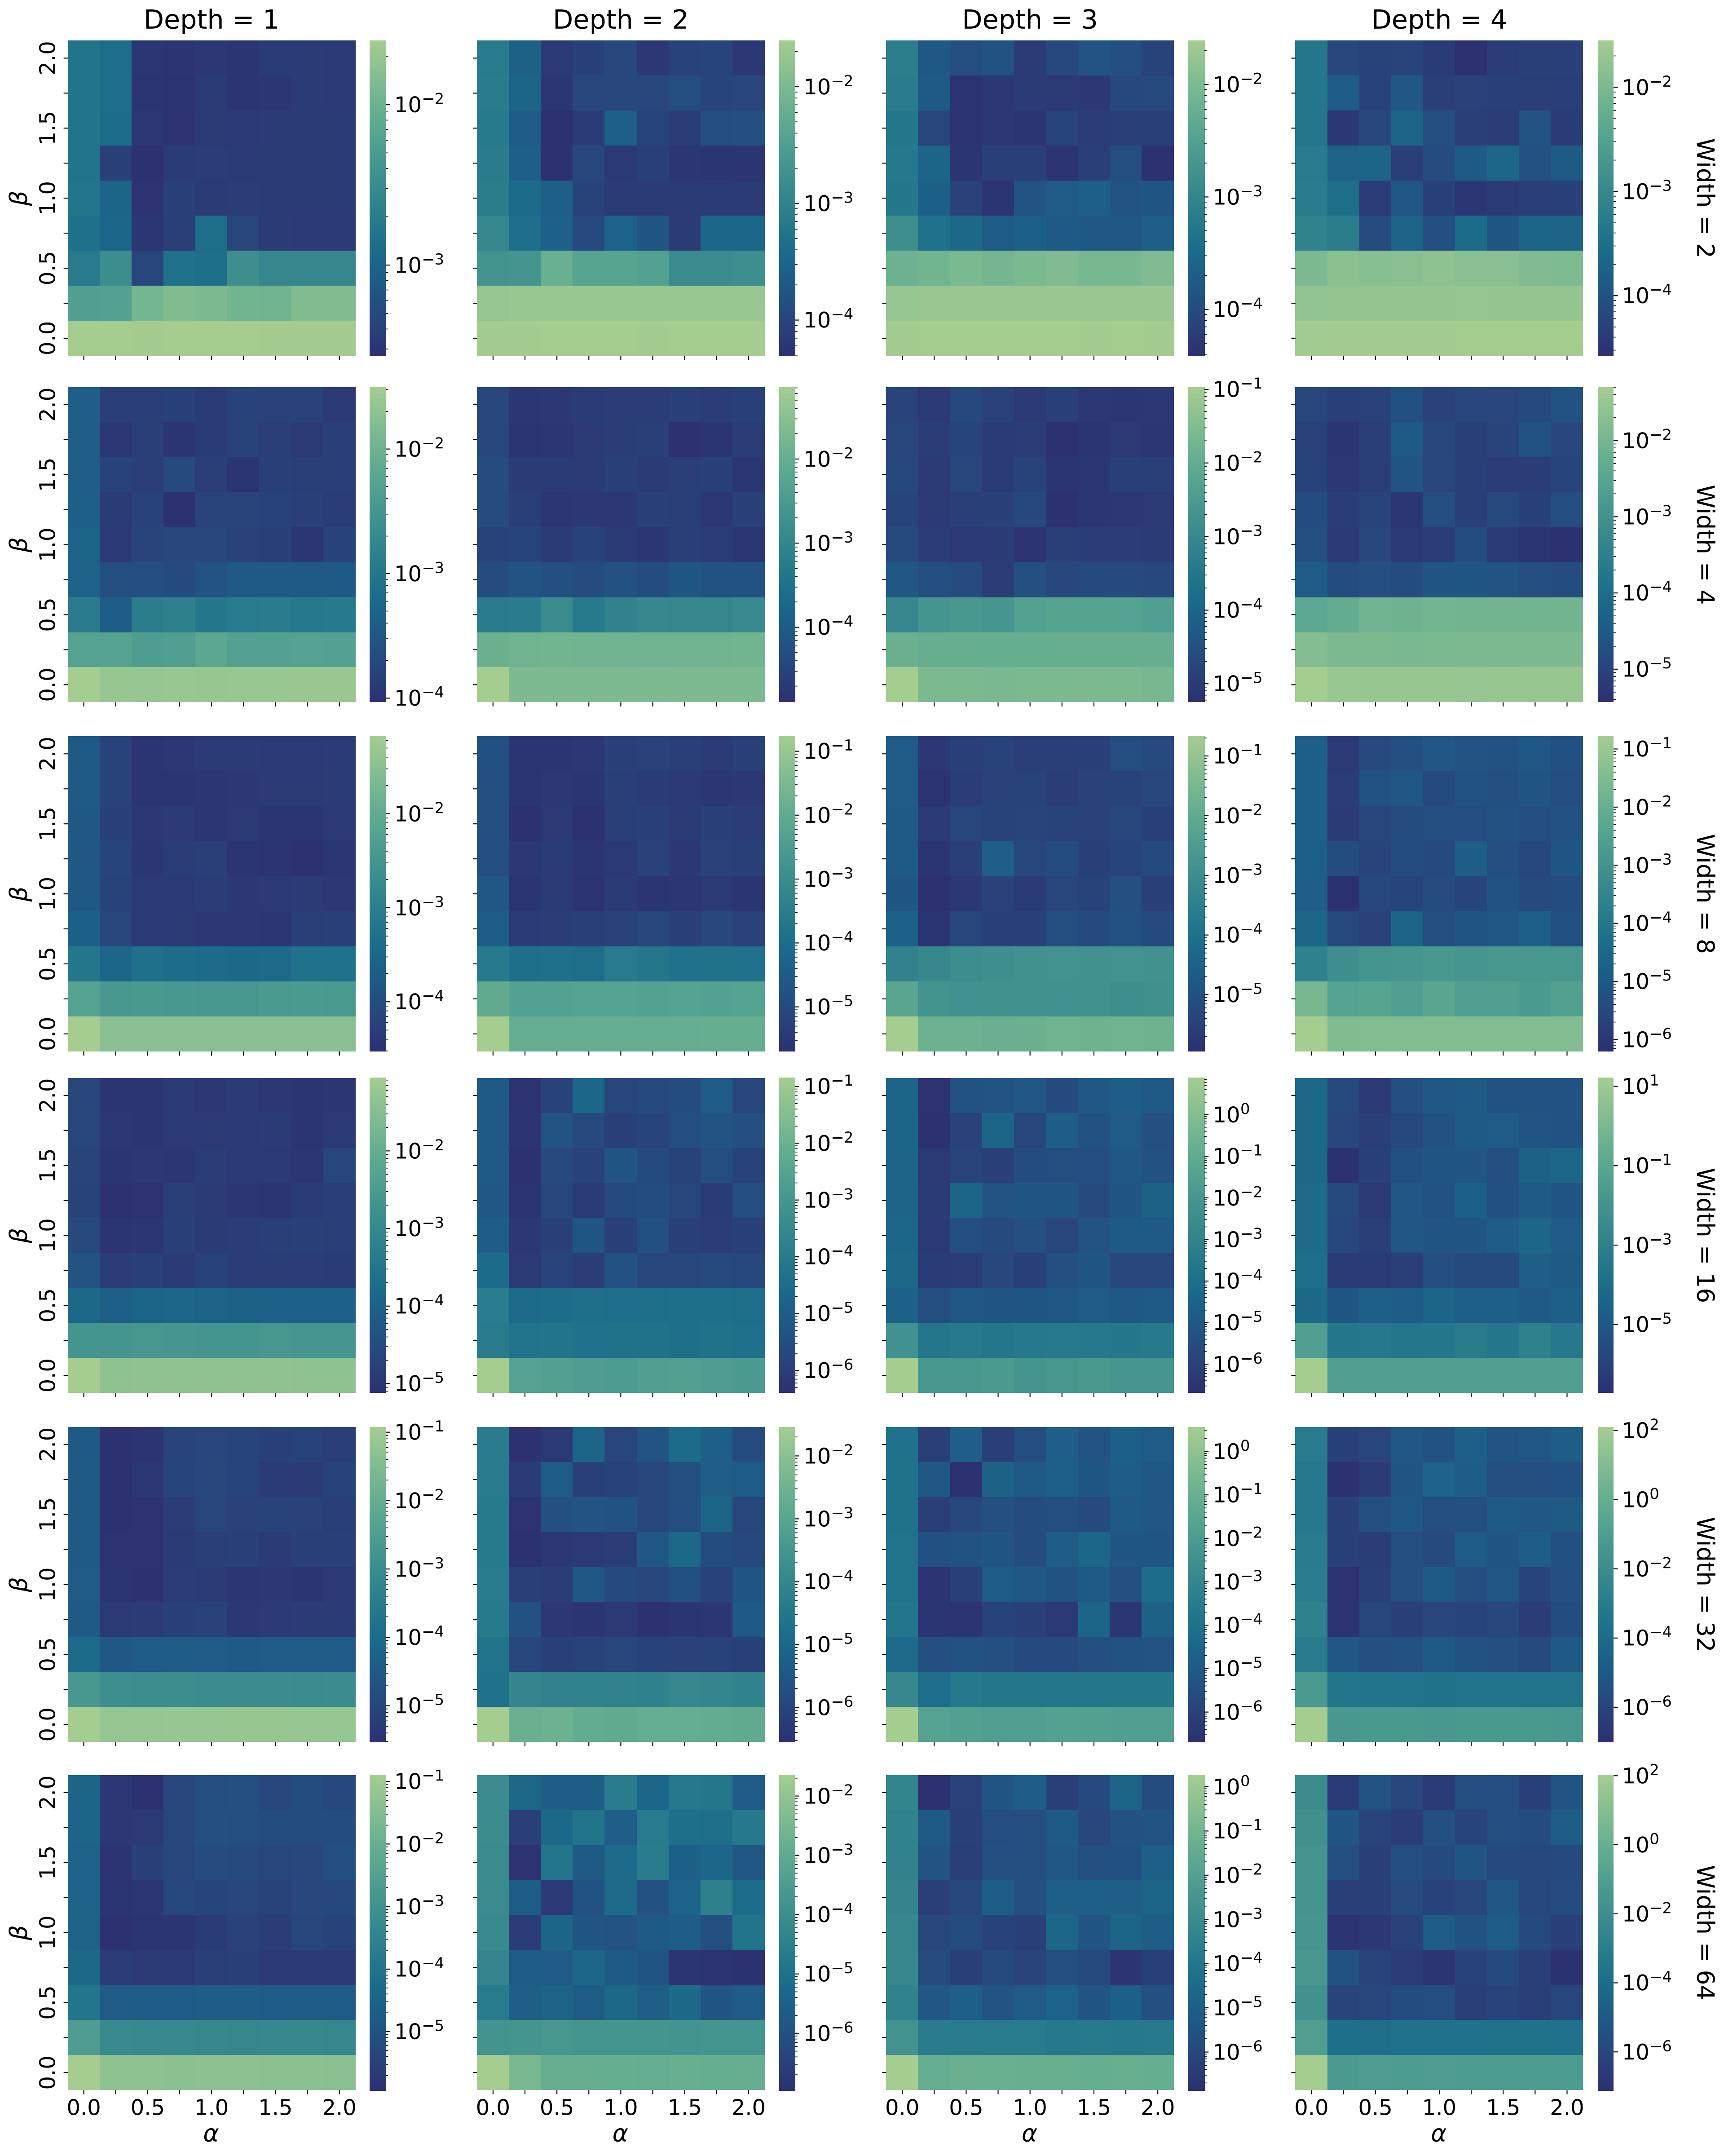

Supplement: supplementary_material [file G20_f4.pdf › supplementary_plots/G20_f4.pdf]

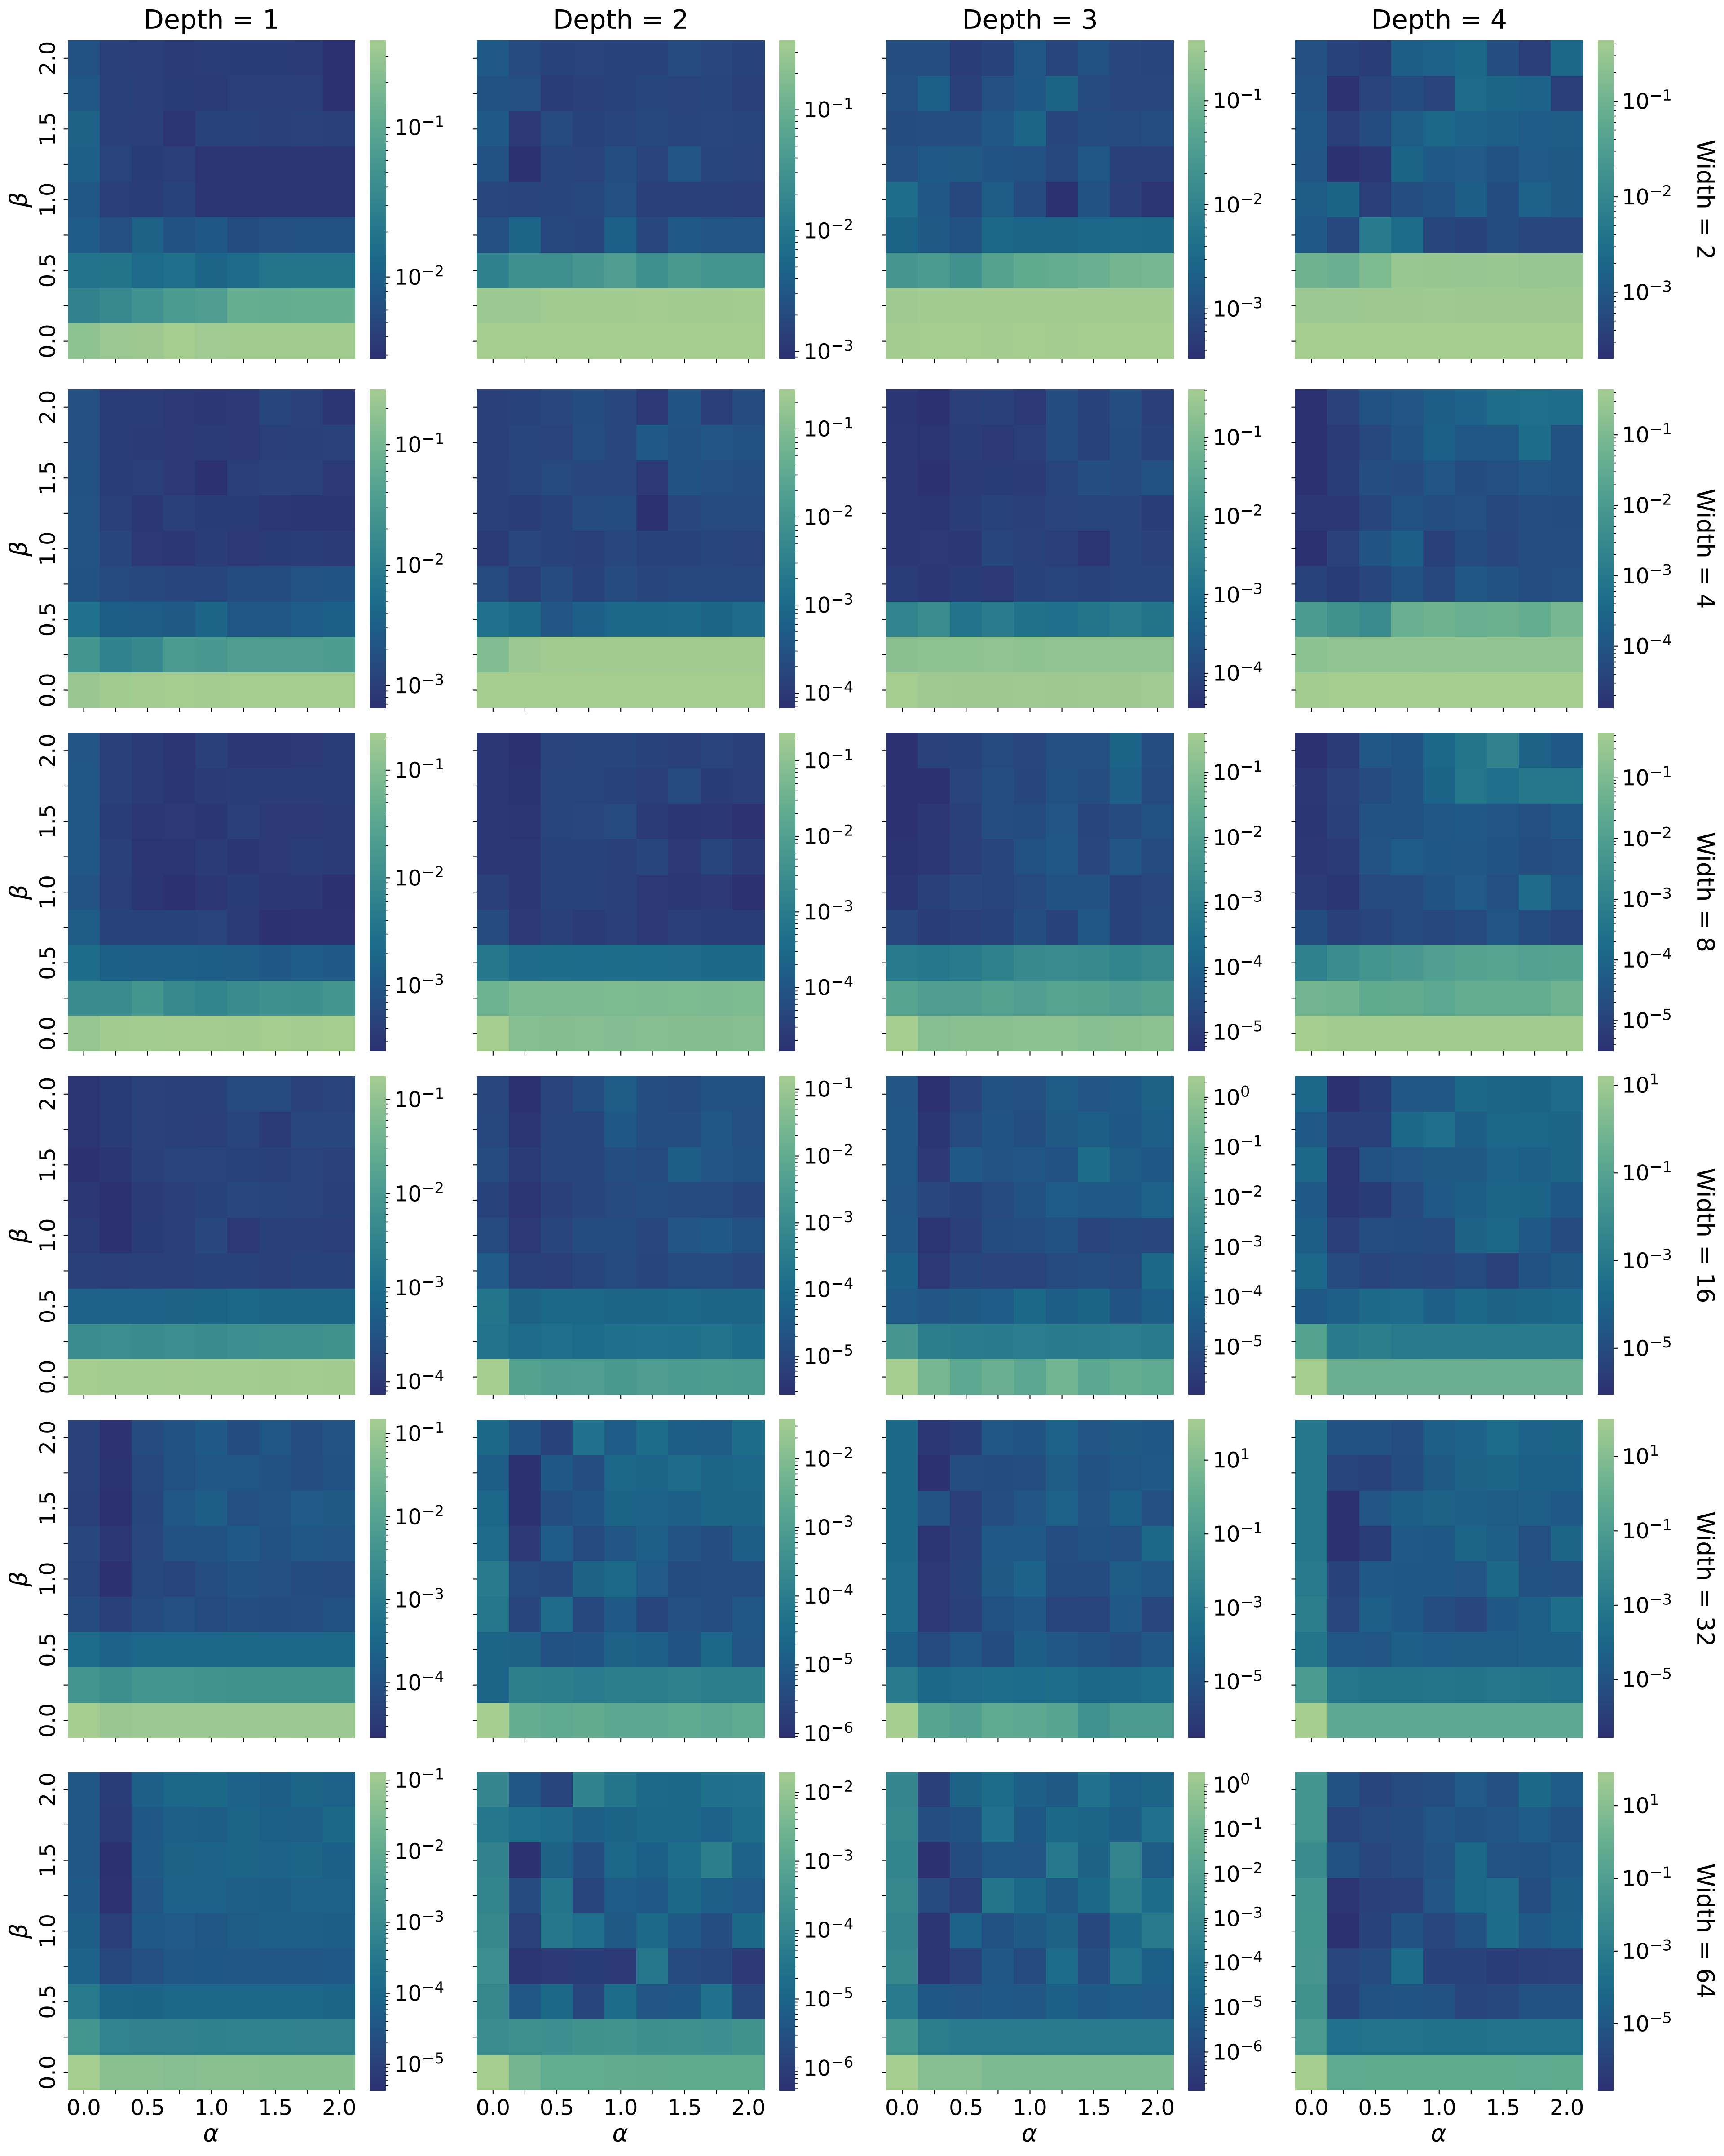

Supplement: supplementary_material [file G20_f5.pdf › supplementary_plots/G20_f5.pdf]

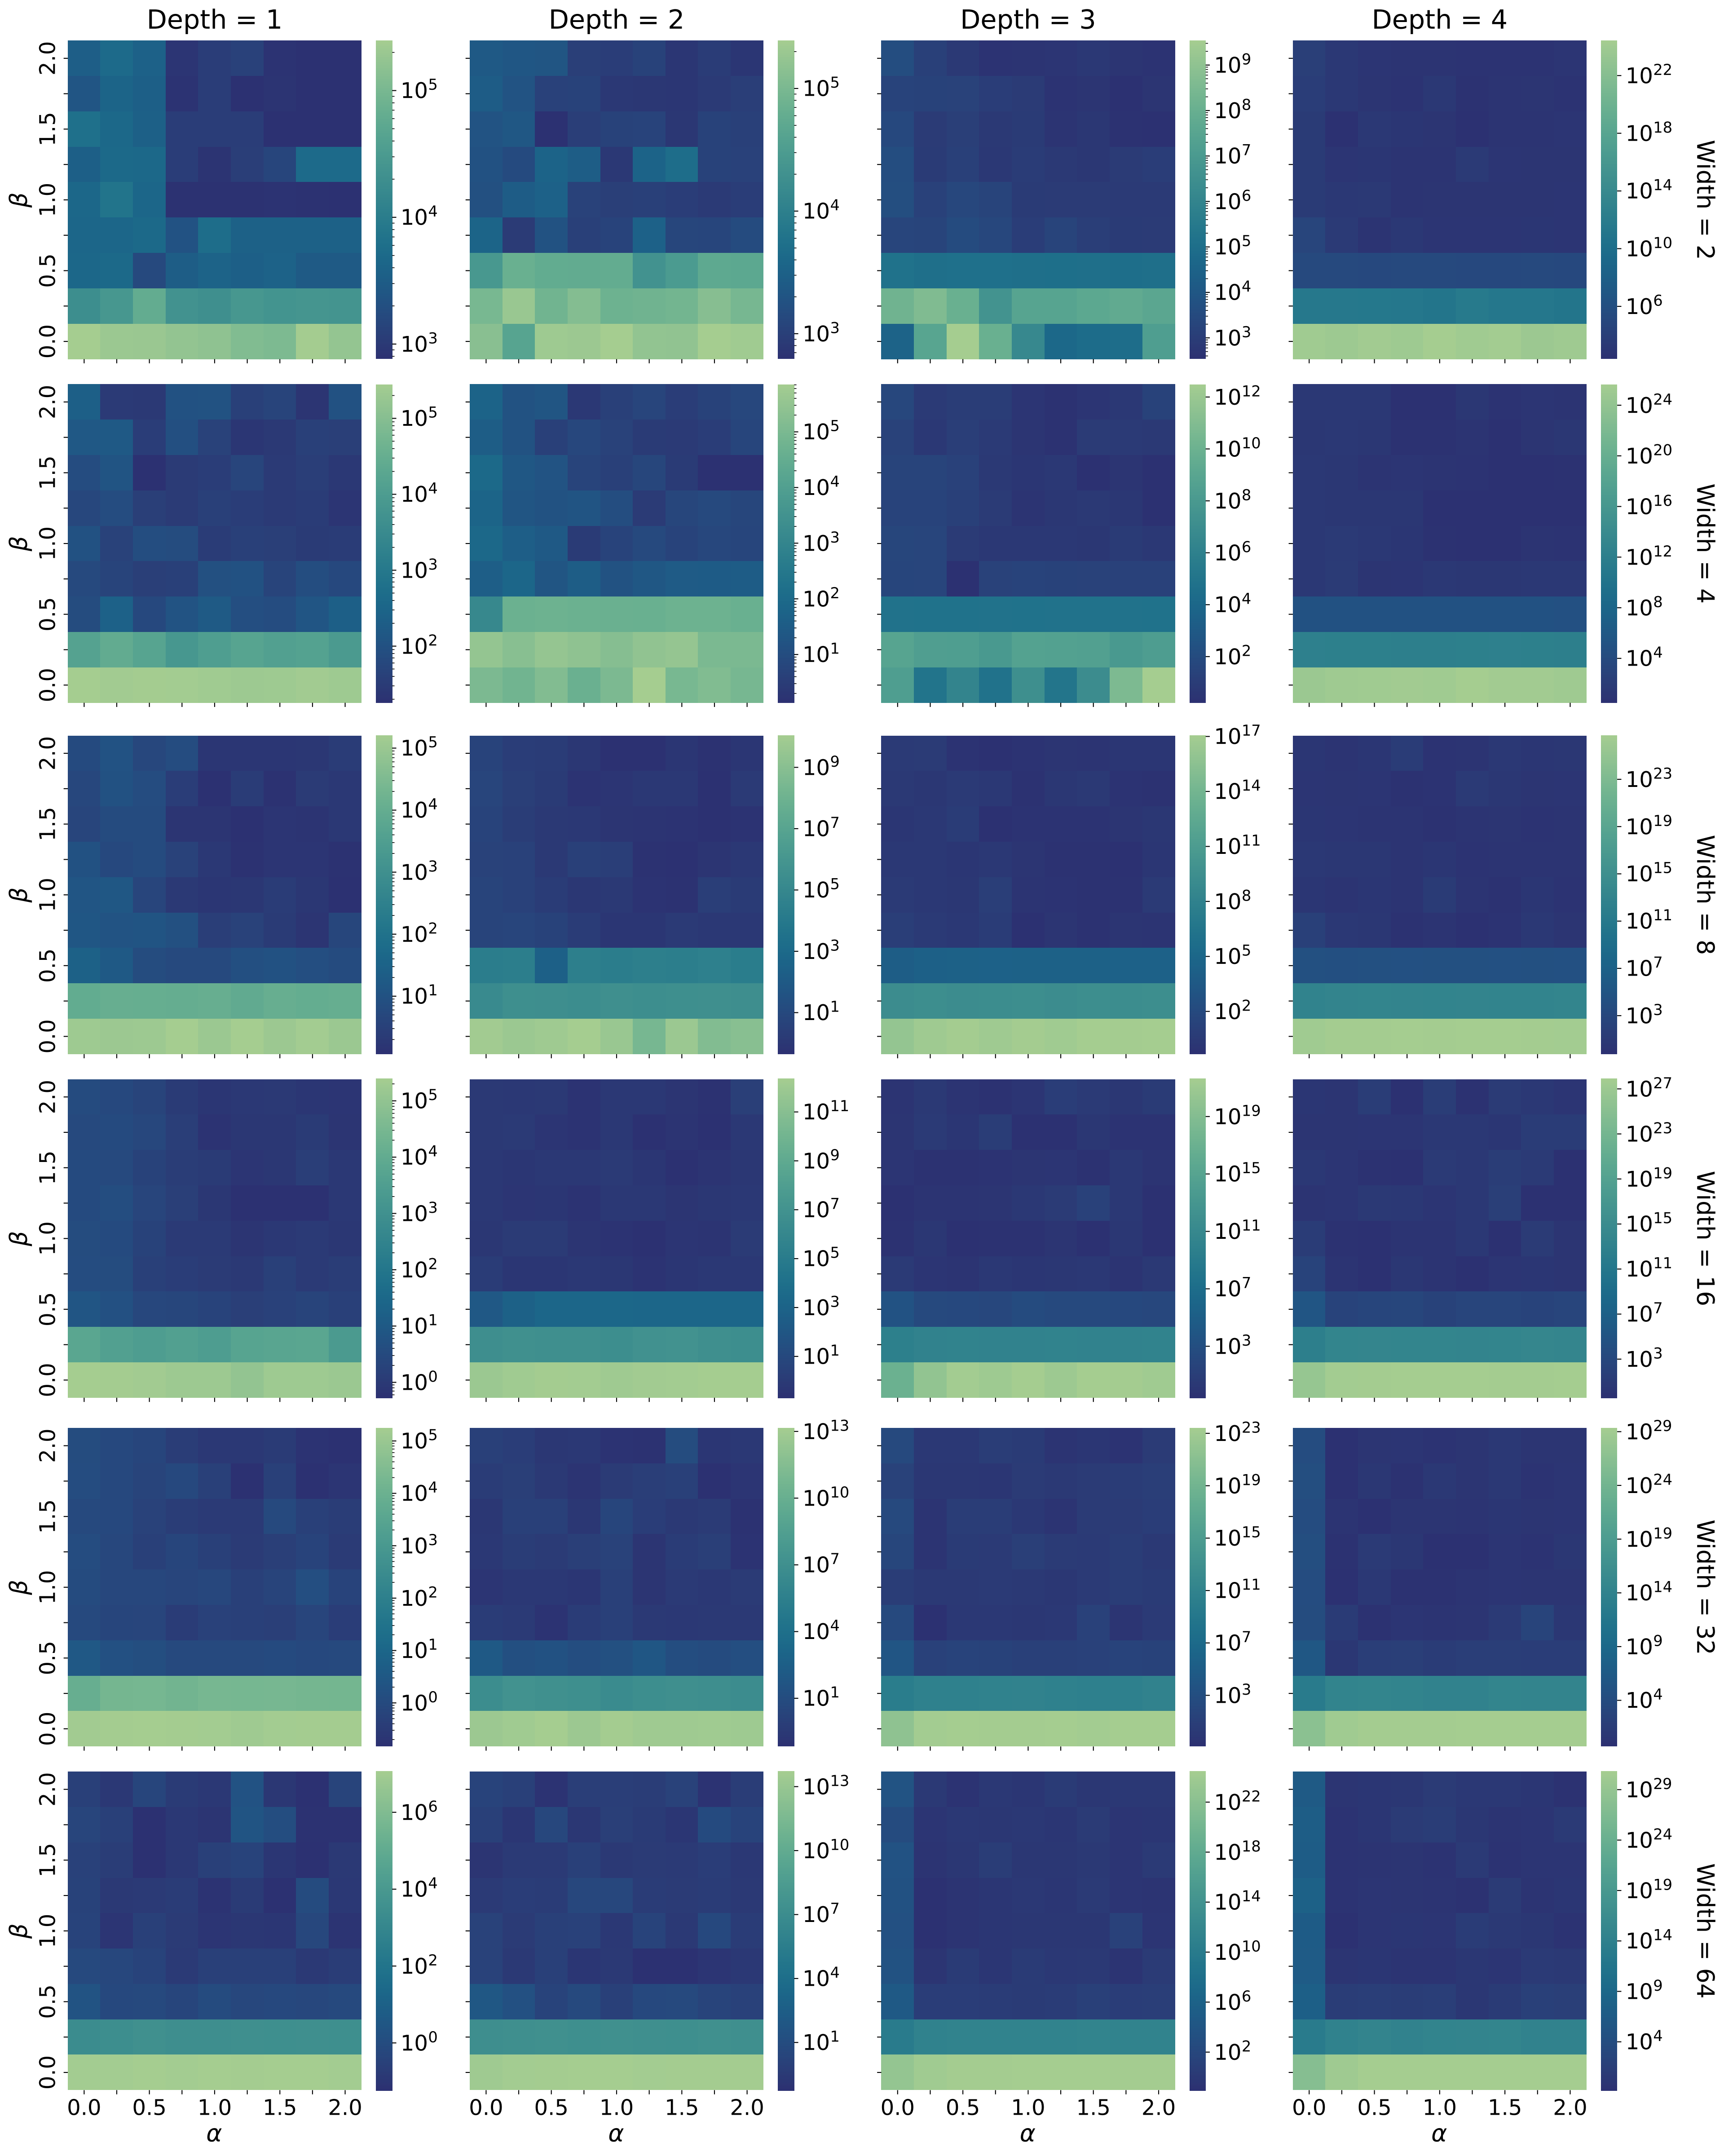

Supplement: supplementary_material [file G20_helmholtz.pdf › supplementary_plots/G20_helmholtz.pdf]

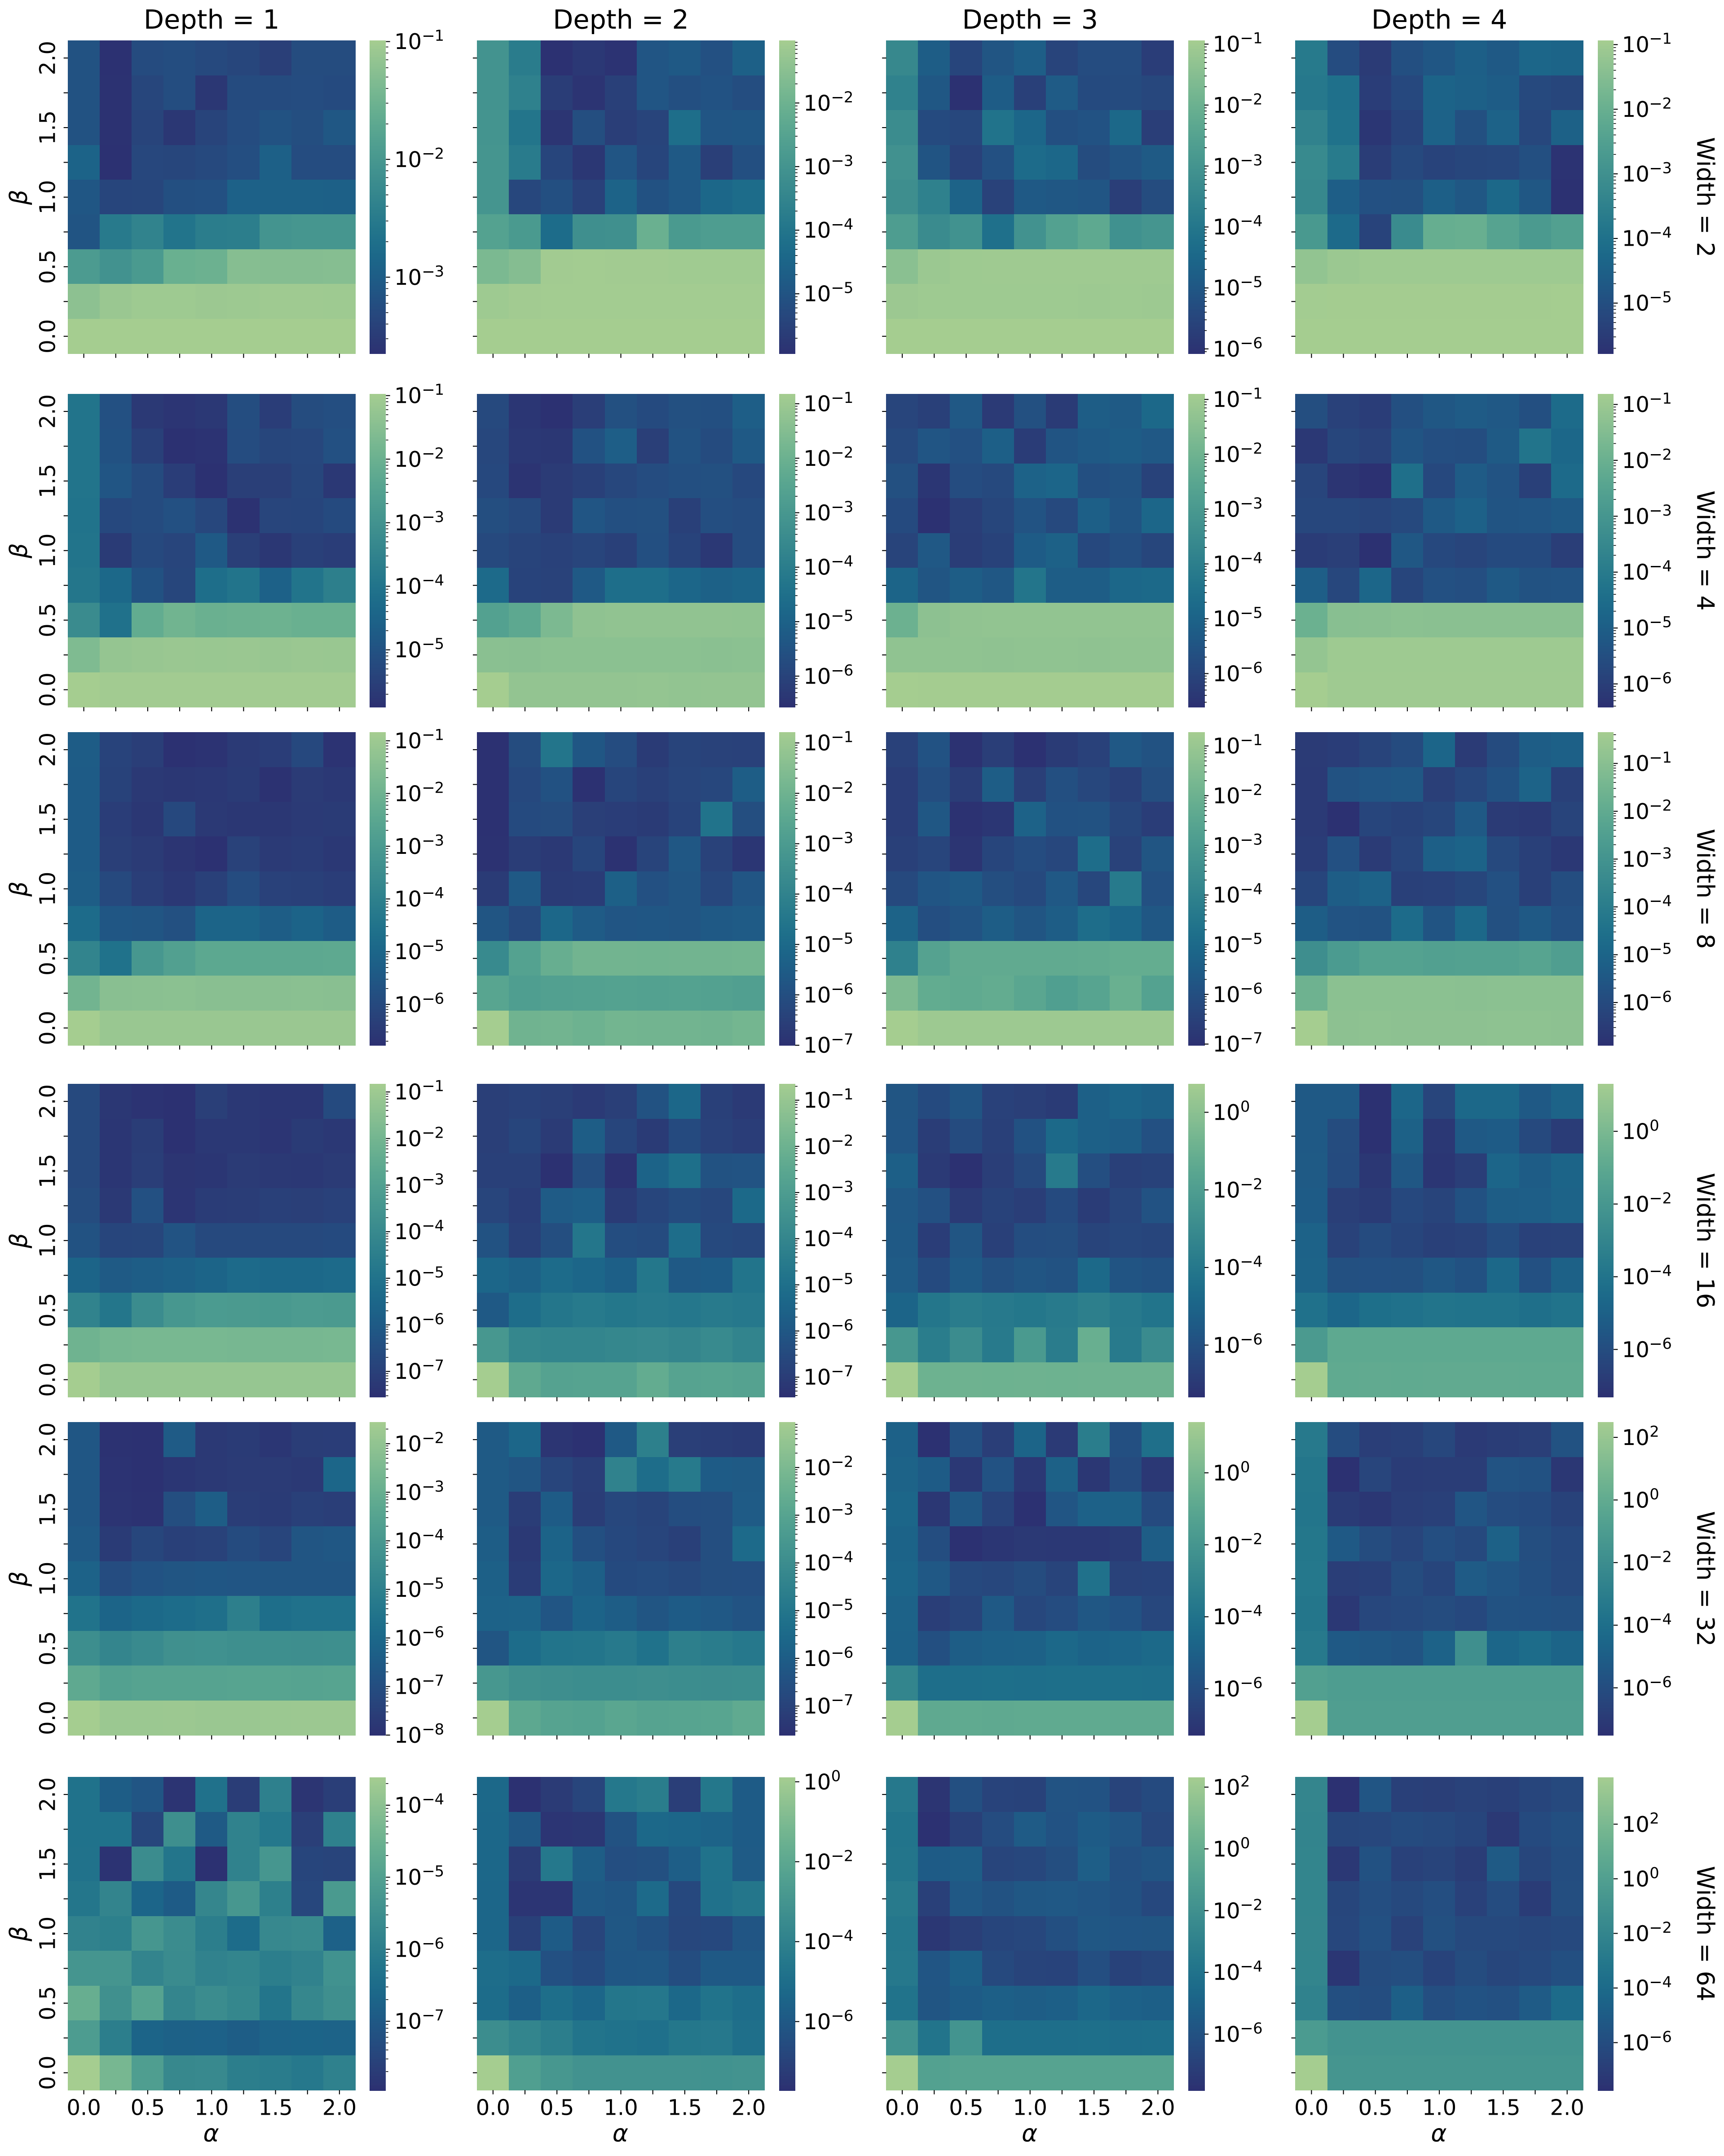

Supplement: supplementary_material [file G40_f1.pdf › supplementary_plots/G40_f1.pdf]

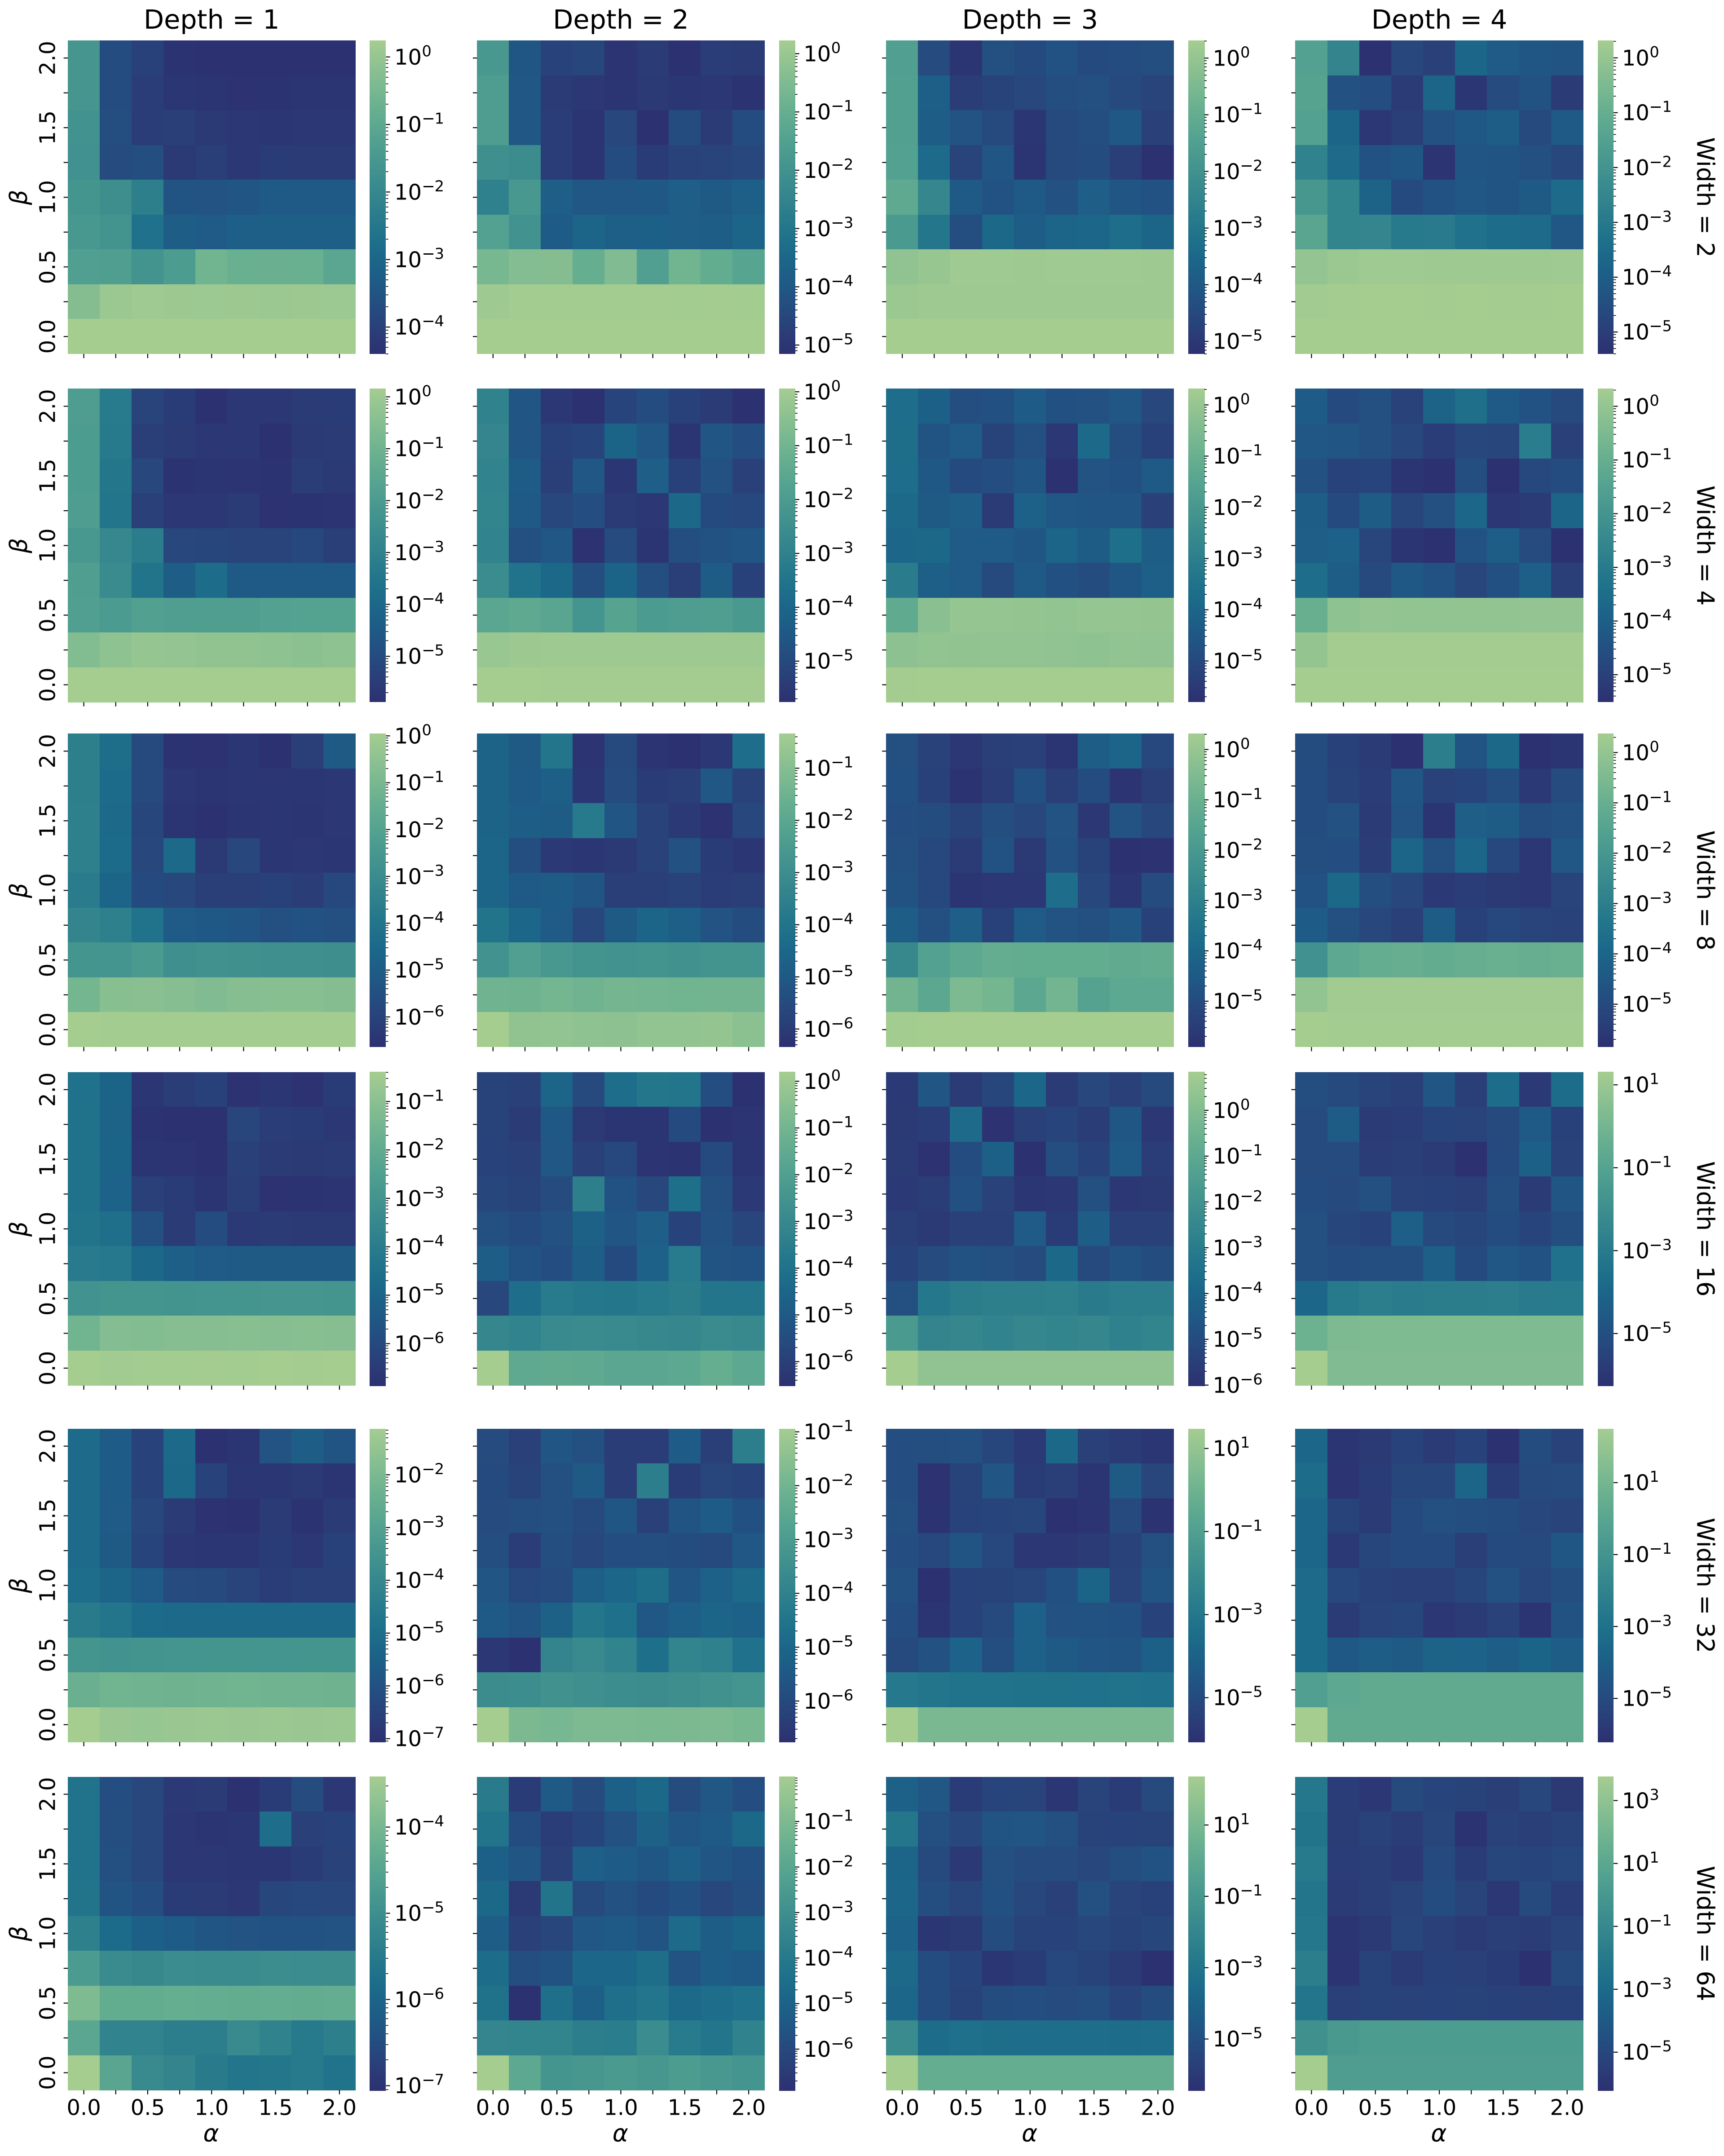

Supplement: supplementary_material [file G40_f2.pdf › supplementary_plots/G40_f2.pdf]

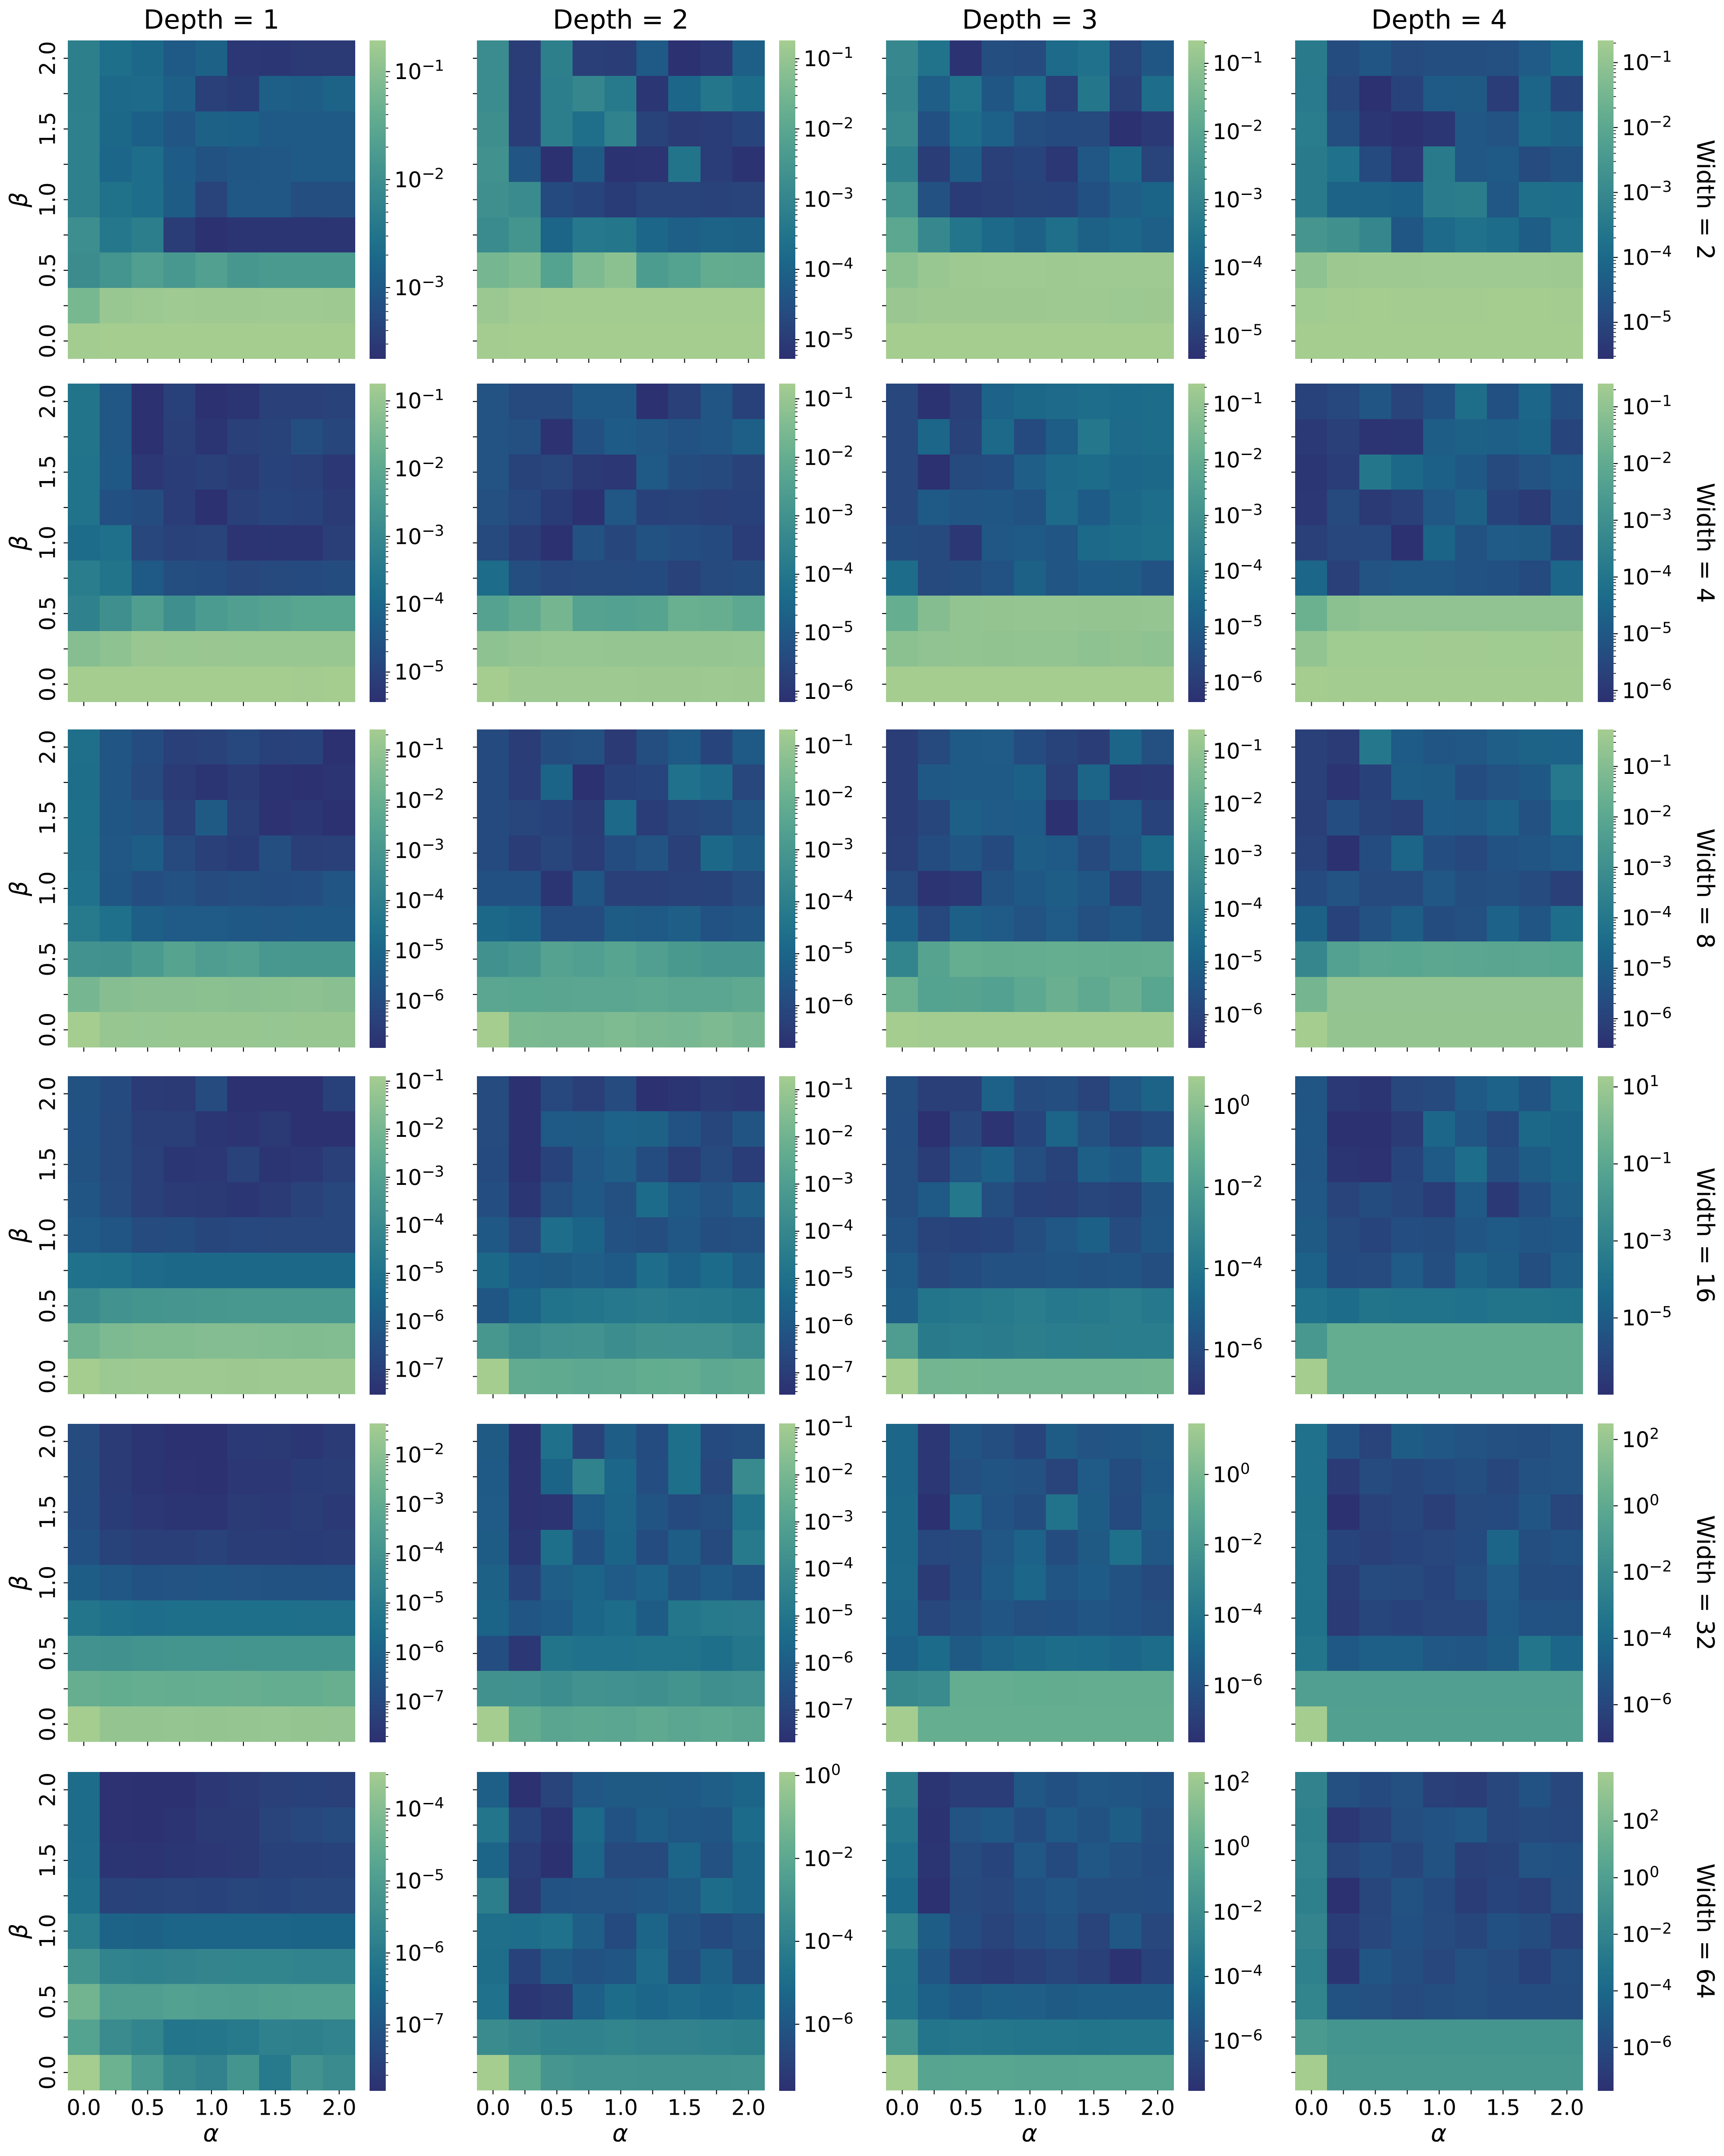

Supplement: supplementary_material [file G40_f3.pdf › supplementary_plots/G40_f3.pdf]

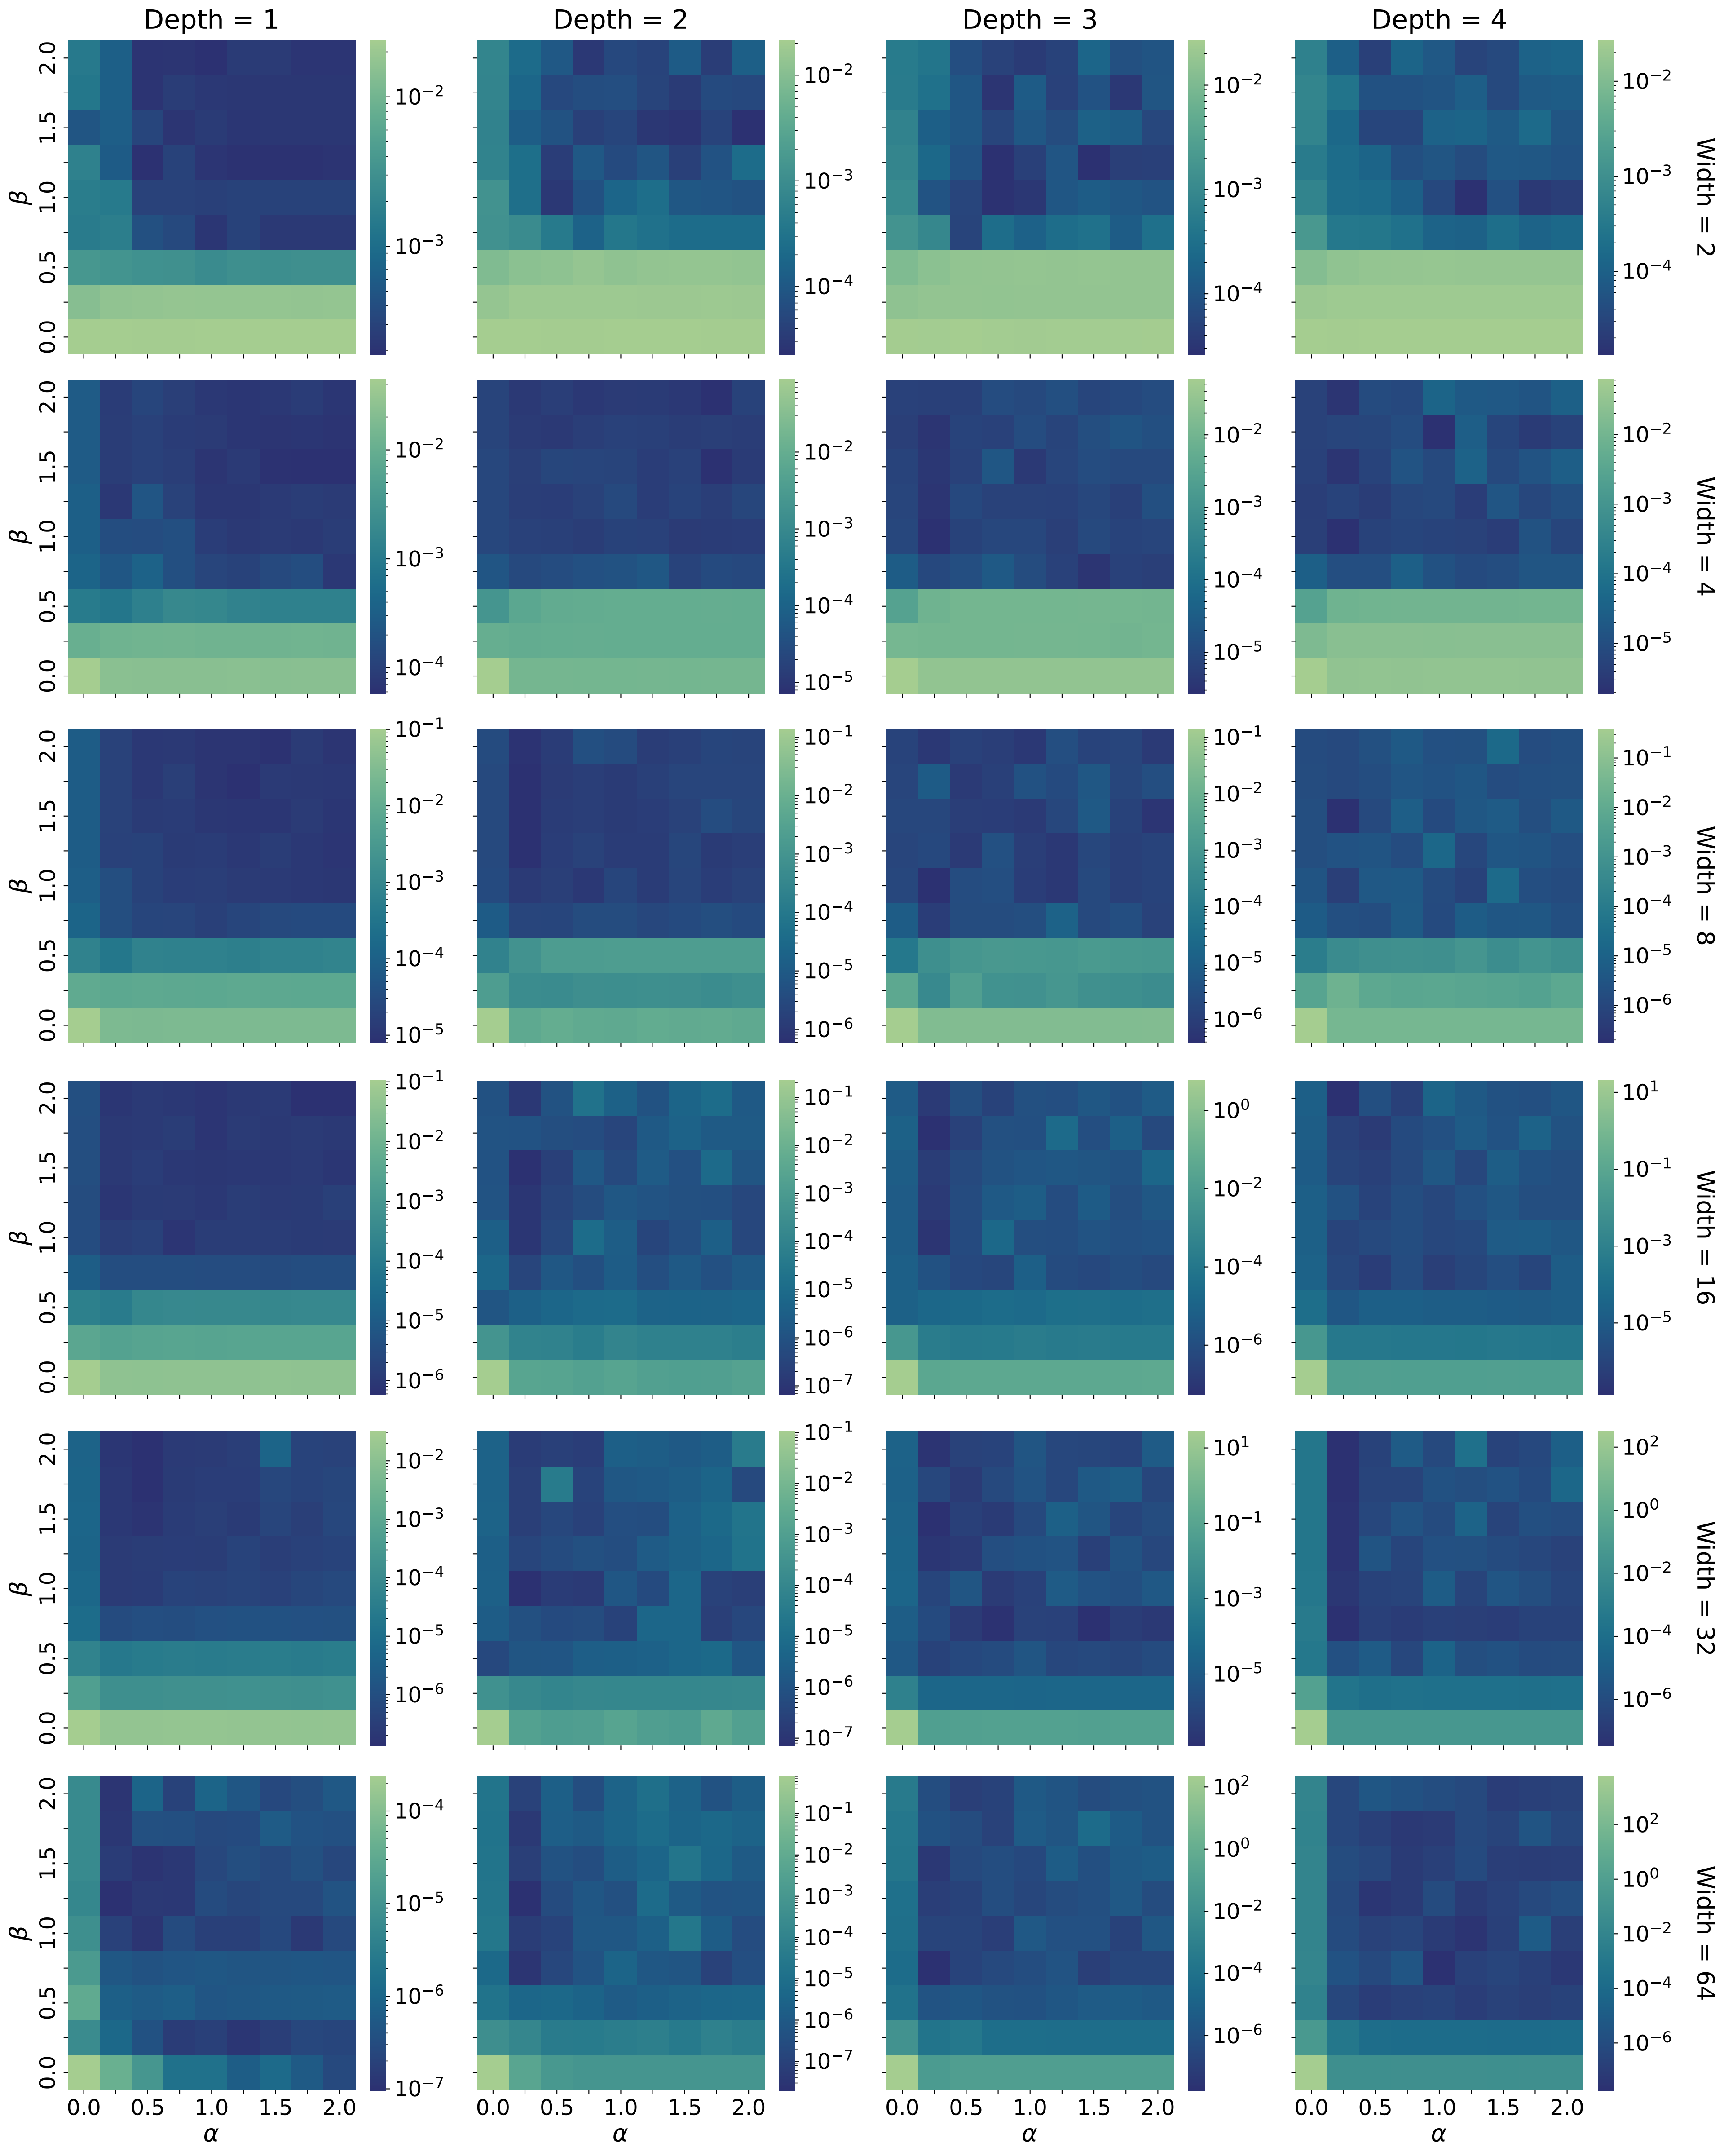

Supplement: supplementary_material [file G40_f4.pdf › supplementary_plots/G40_f4.pdf]

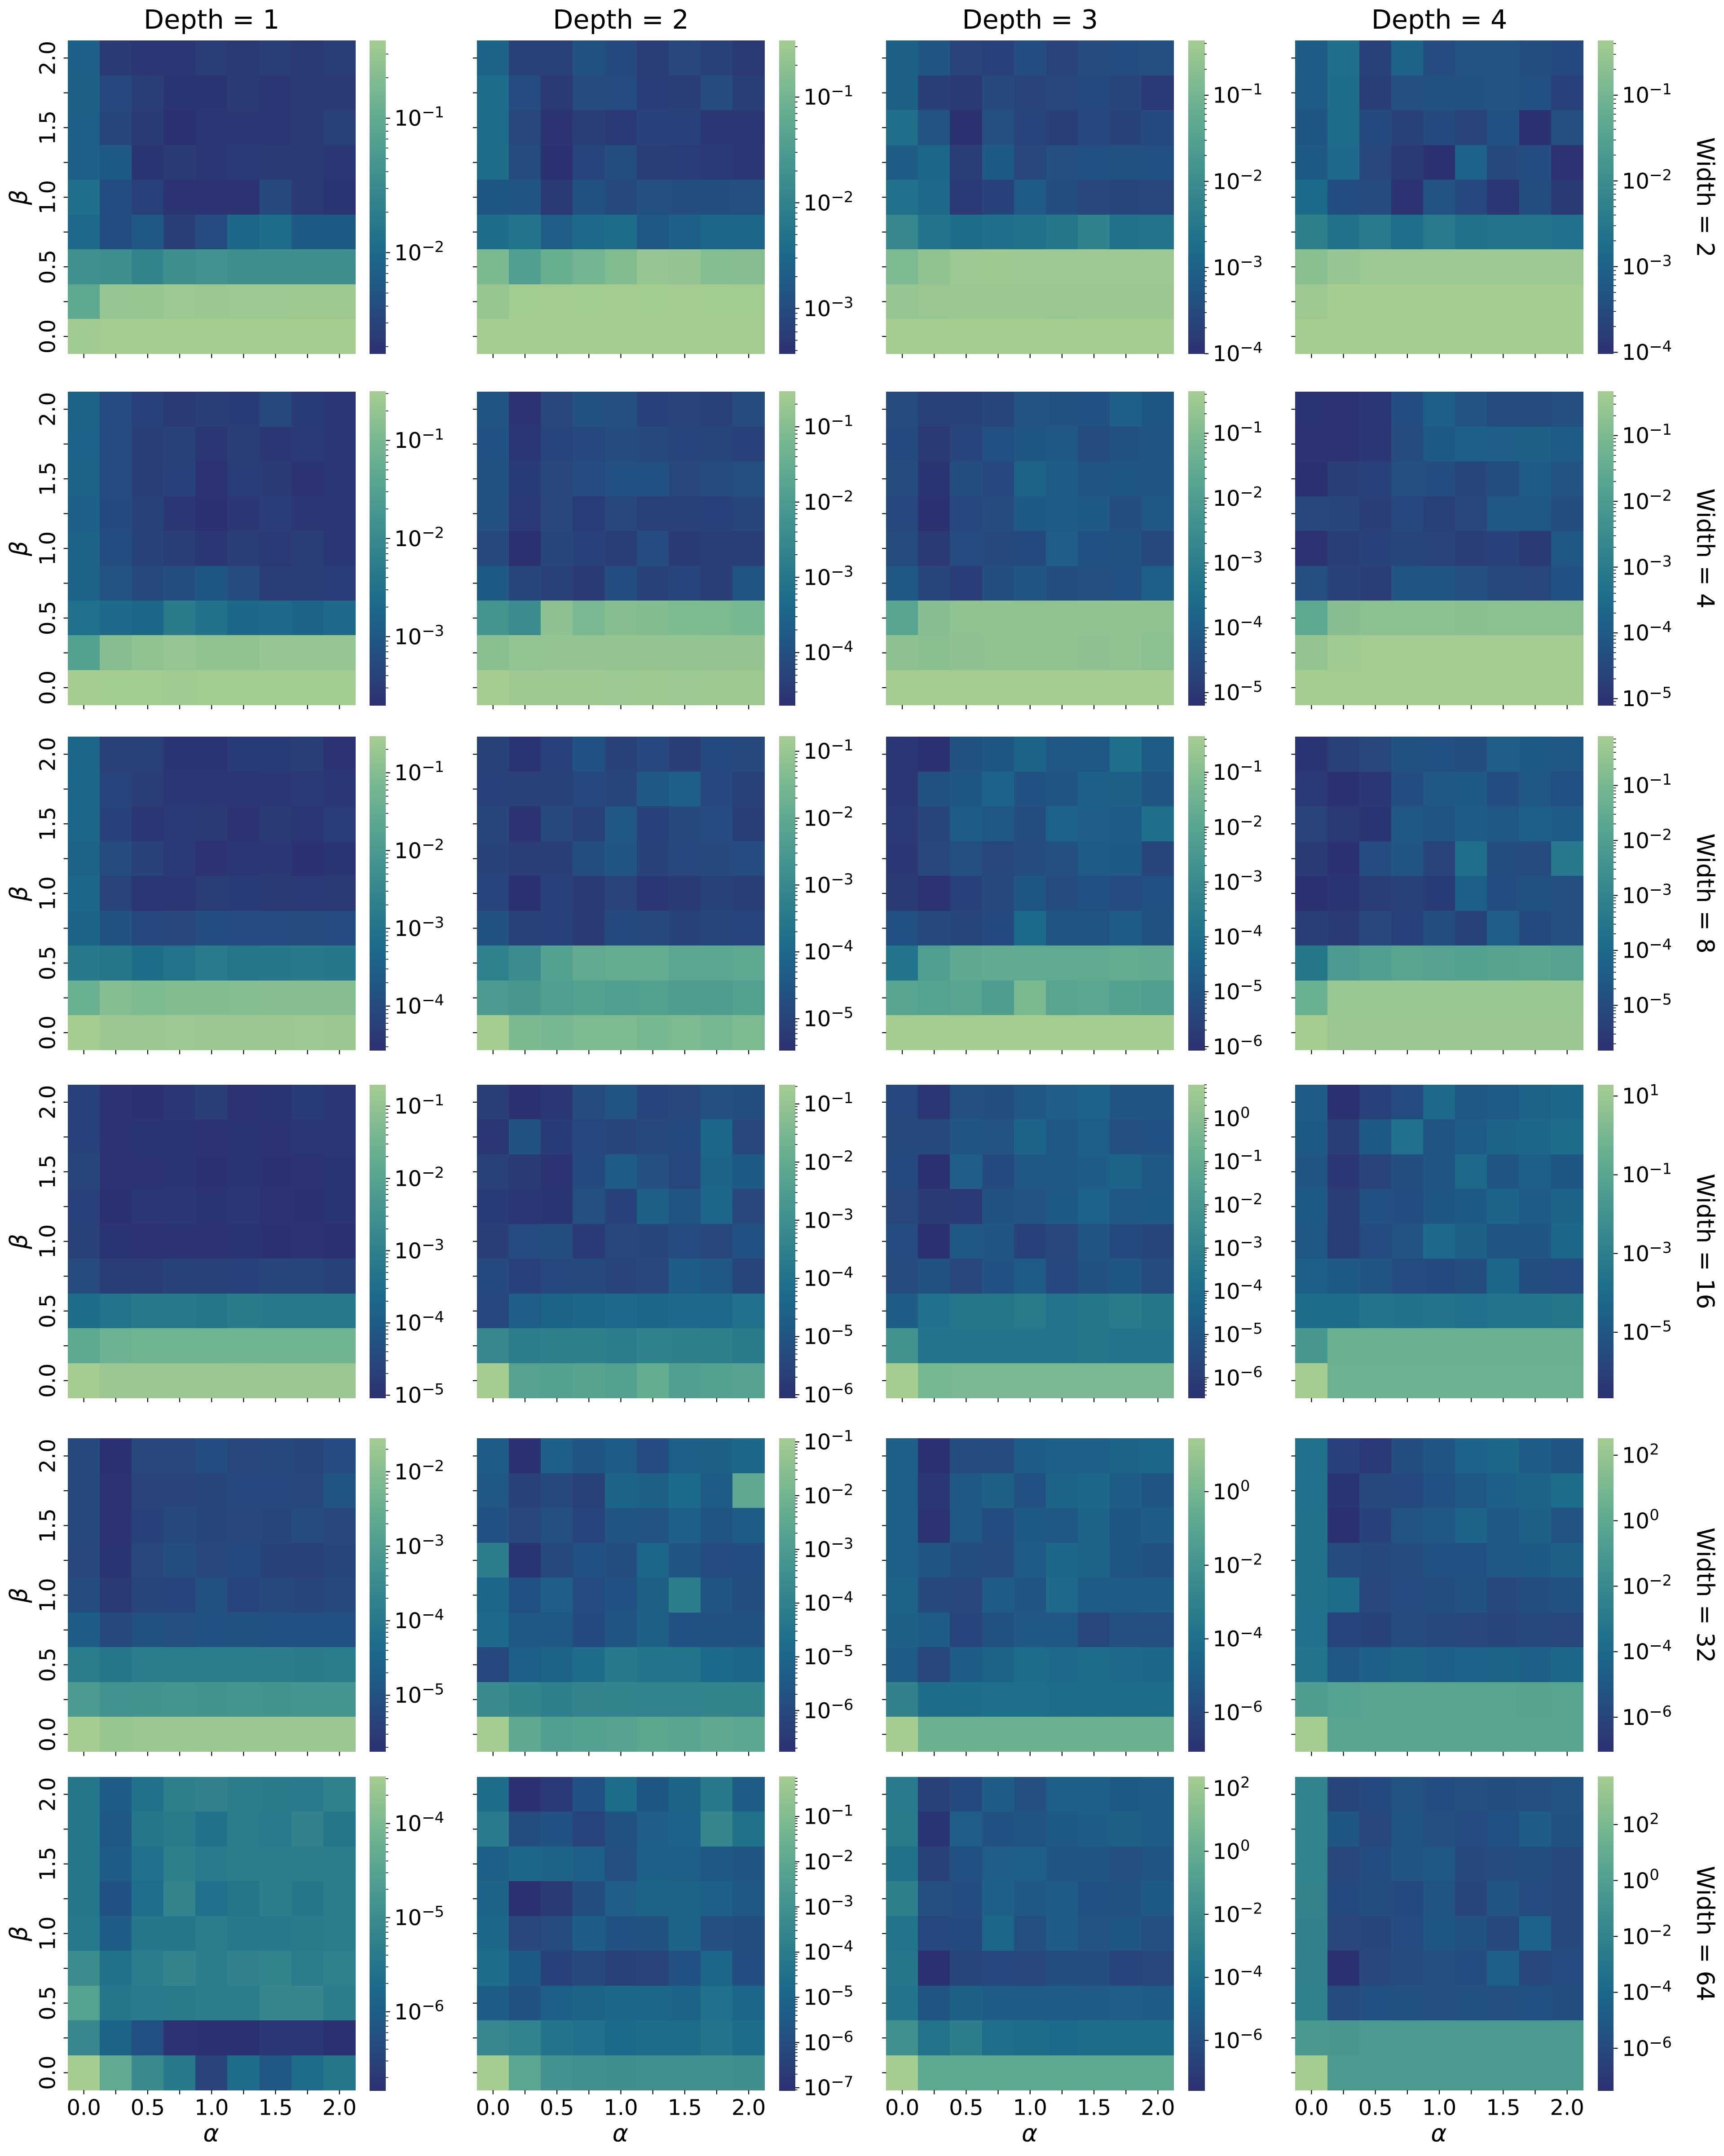

Supplement: supplementary_material [file G40_f5.pdf › supplementary_plots/G40_f5.pdf]

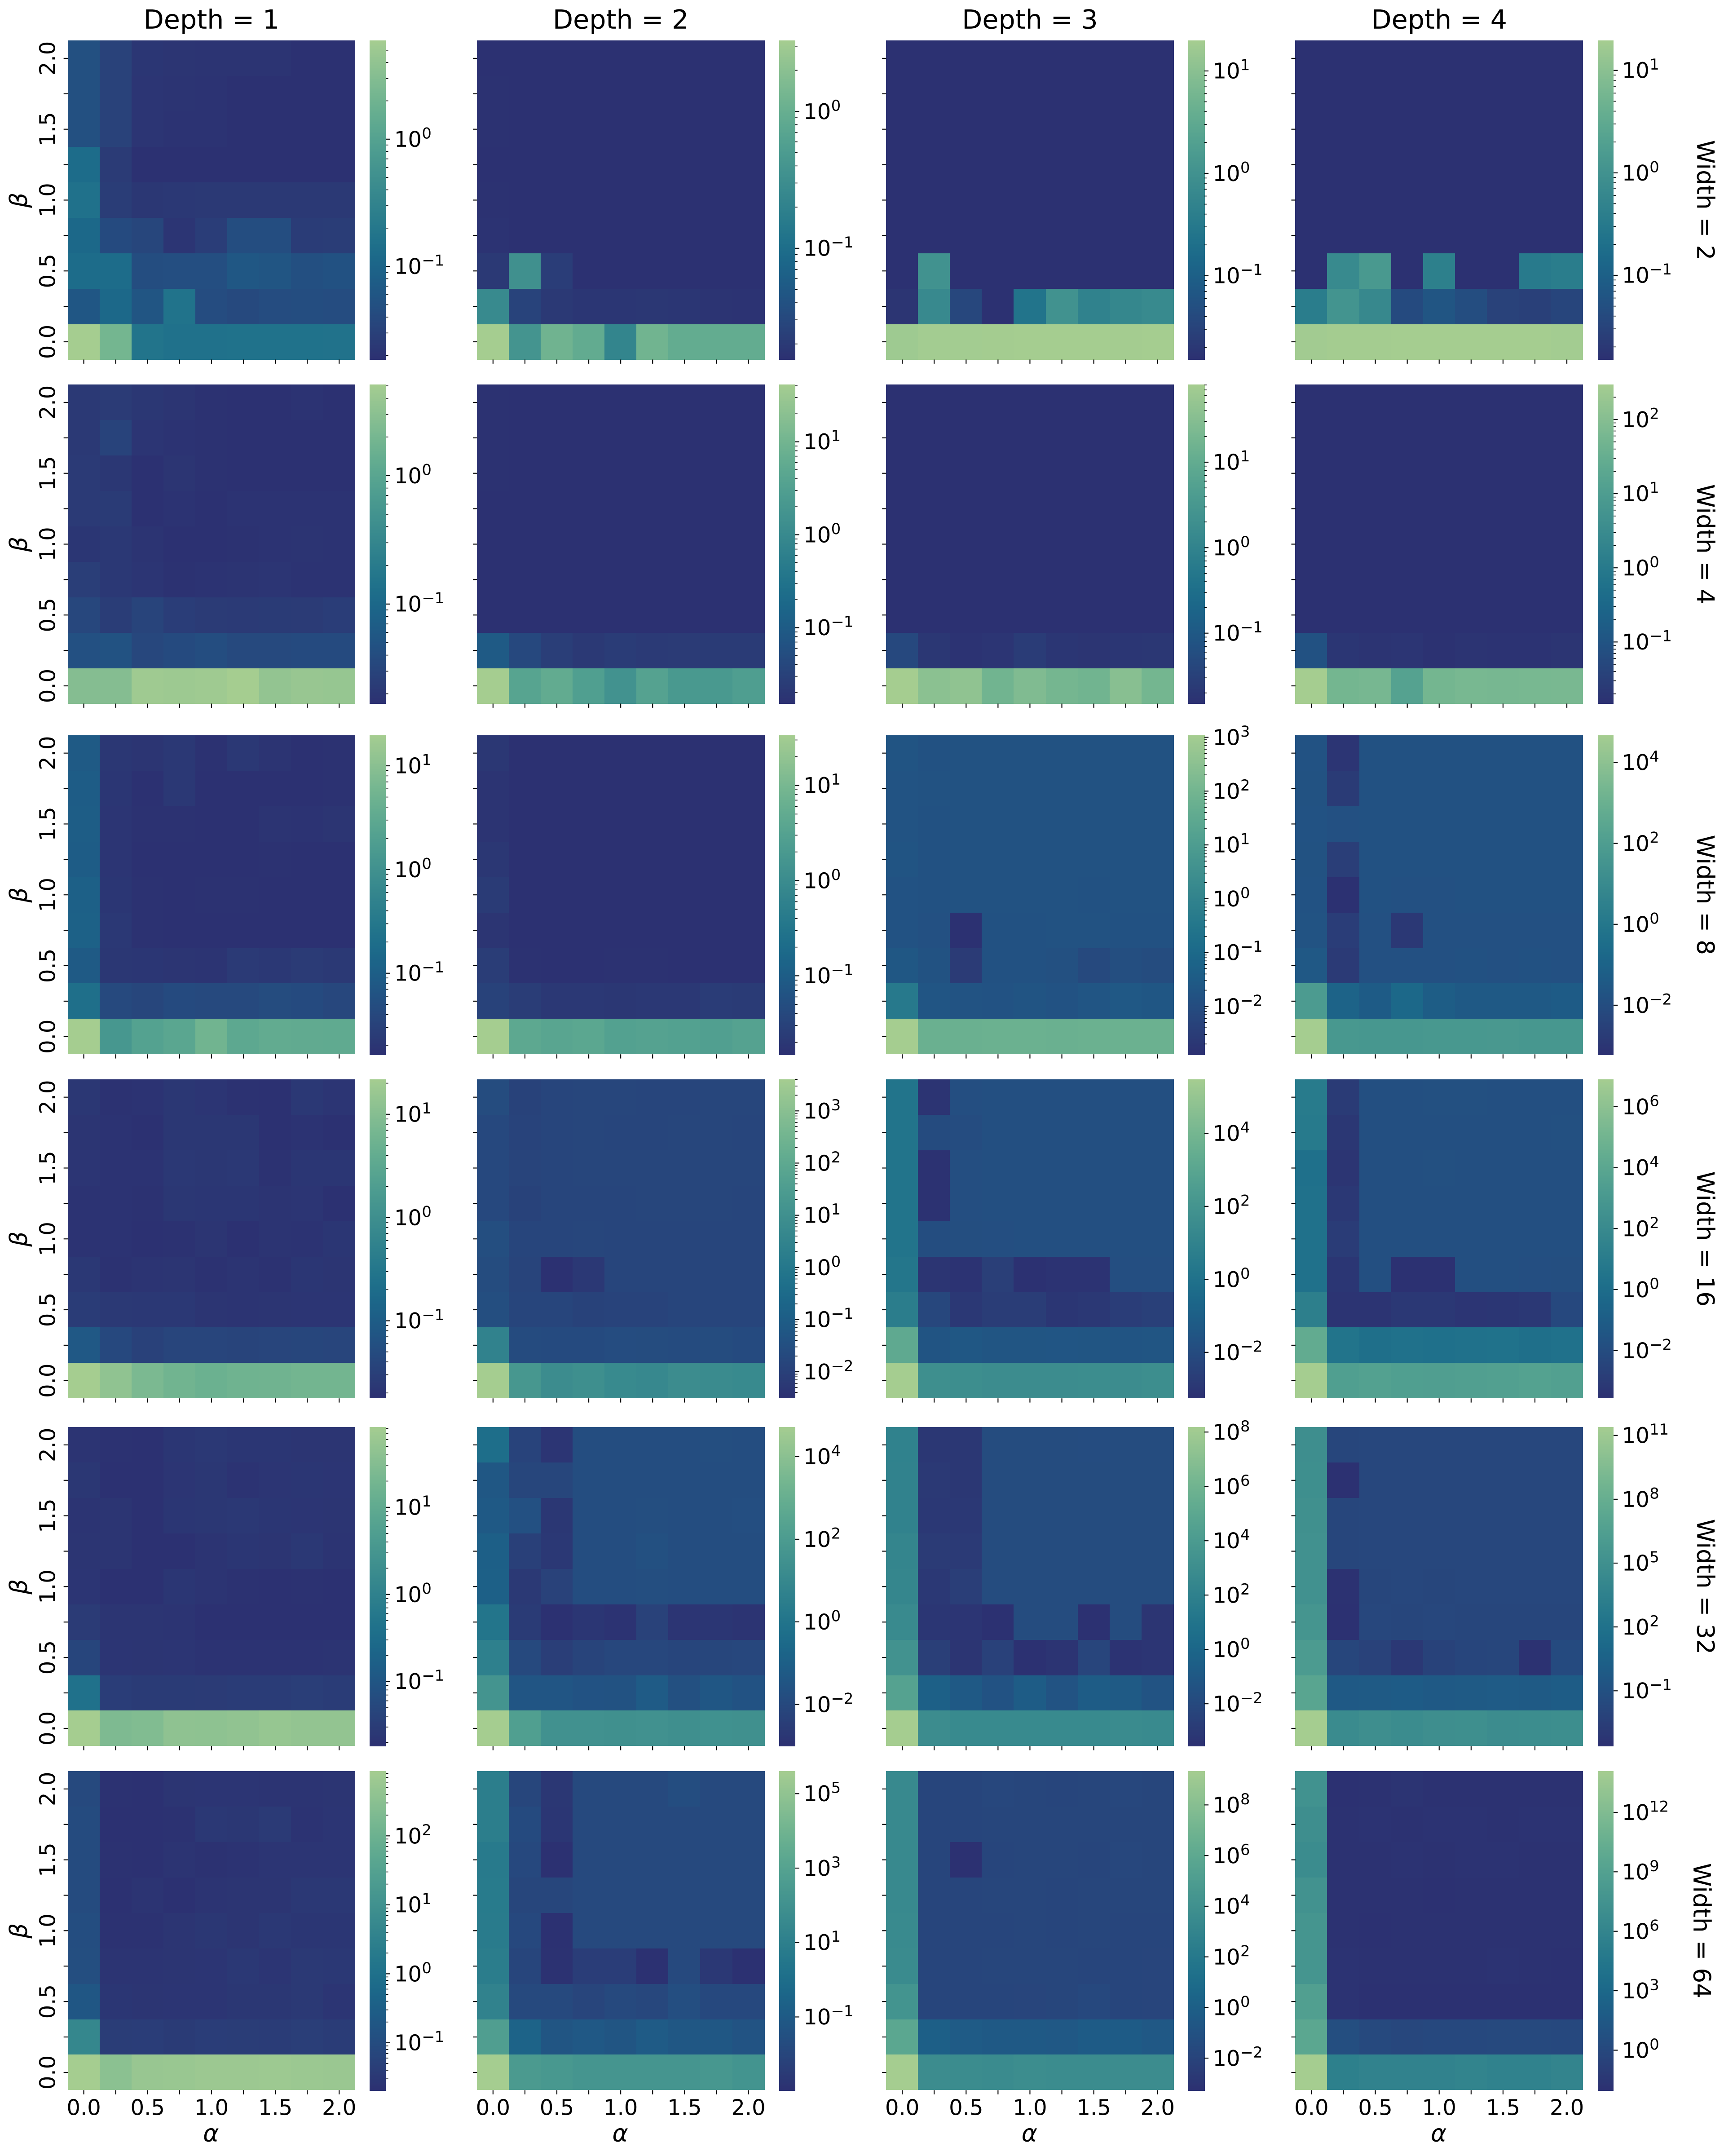

Supplement: supplementary_material [file G5_ac.pdf › supplementary_plots/G5_ac.pdf]

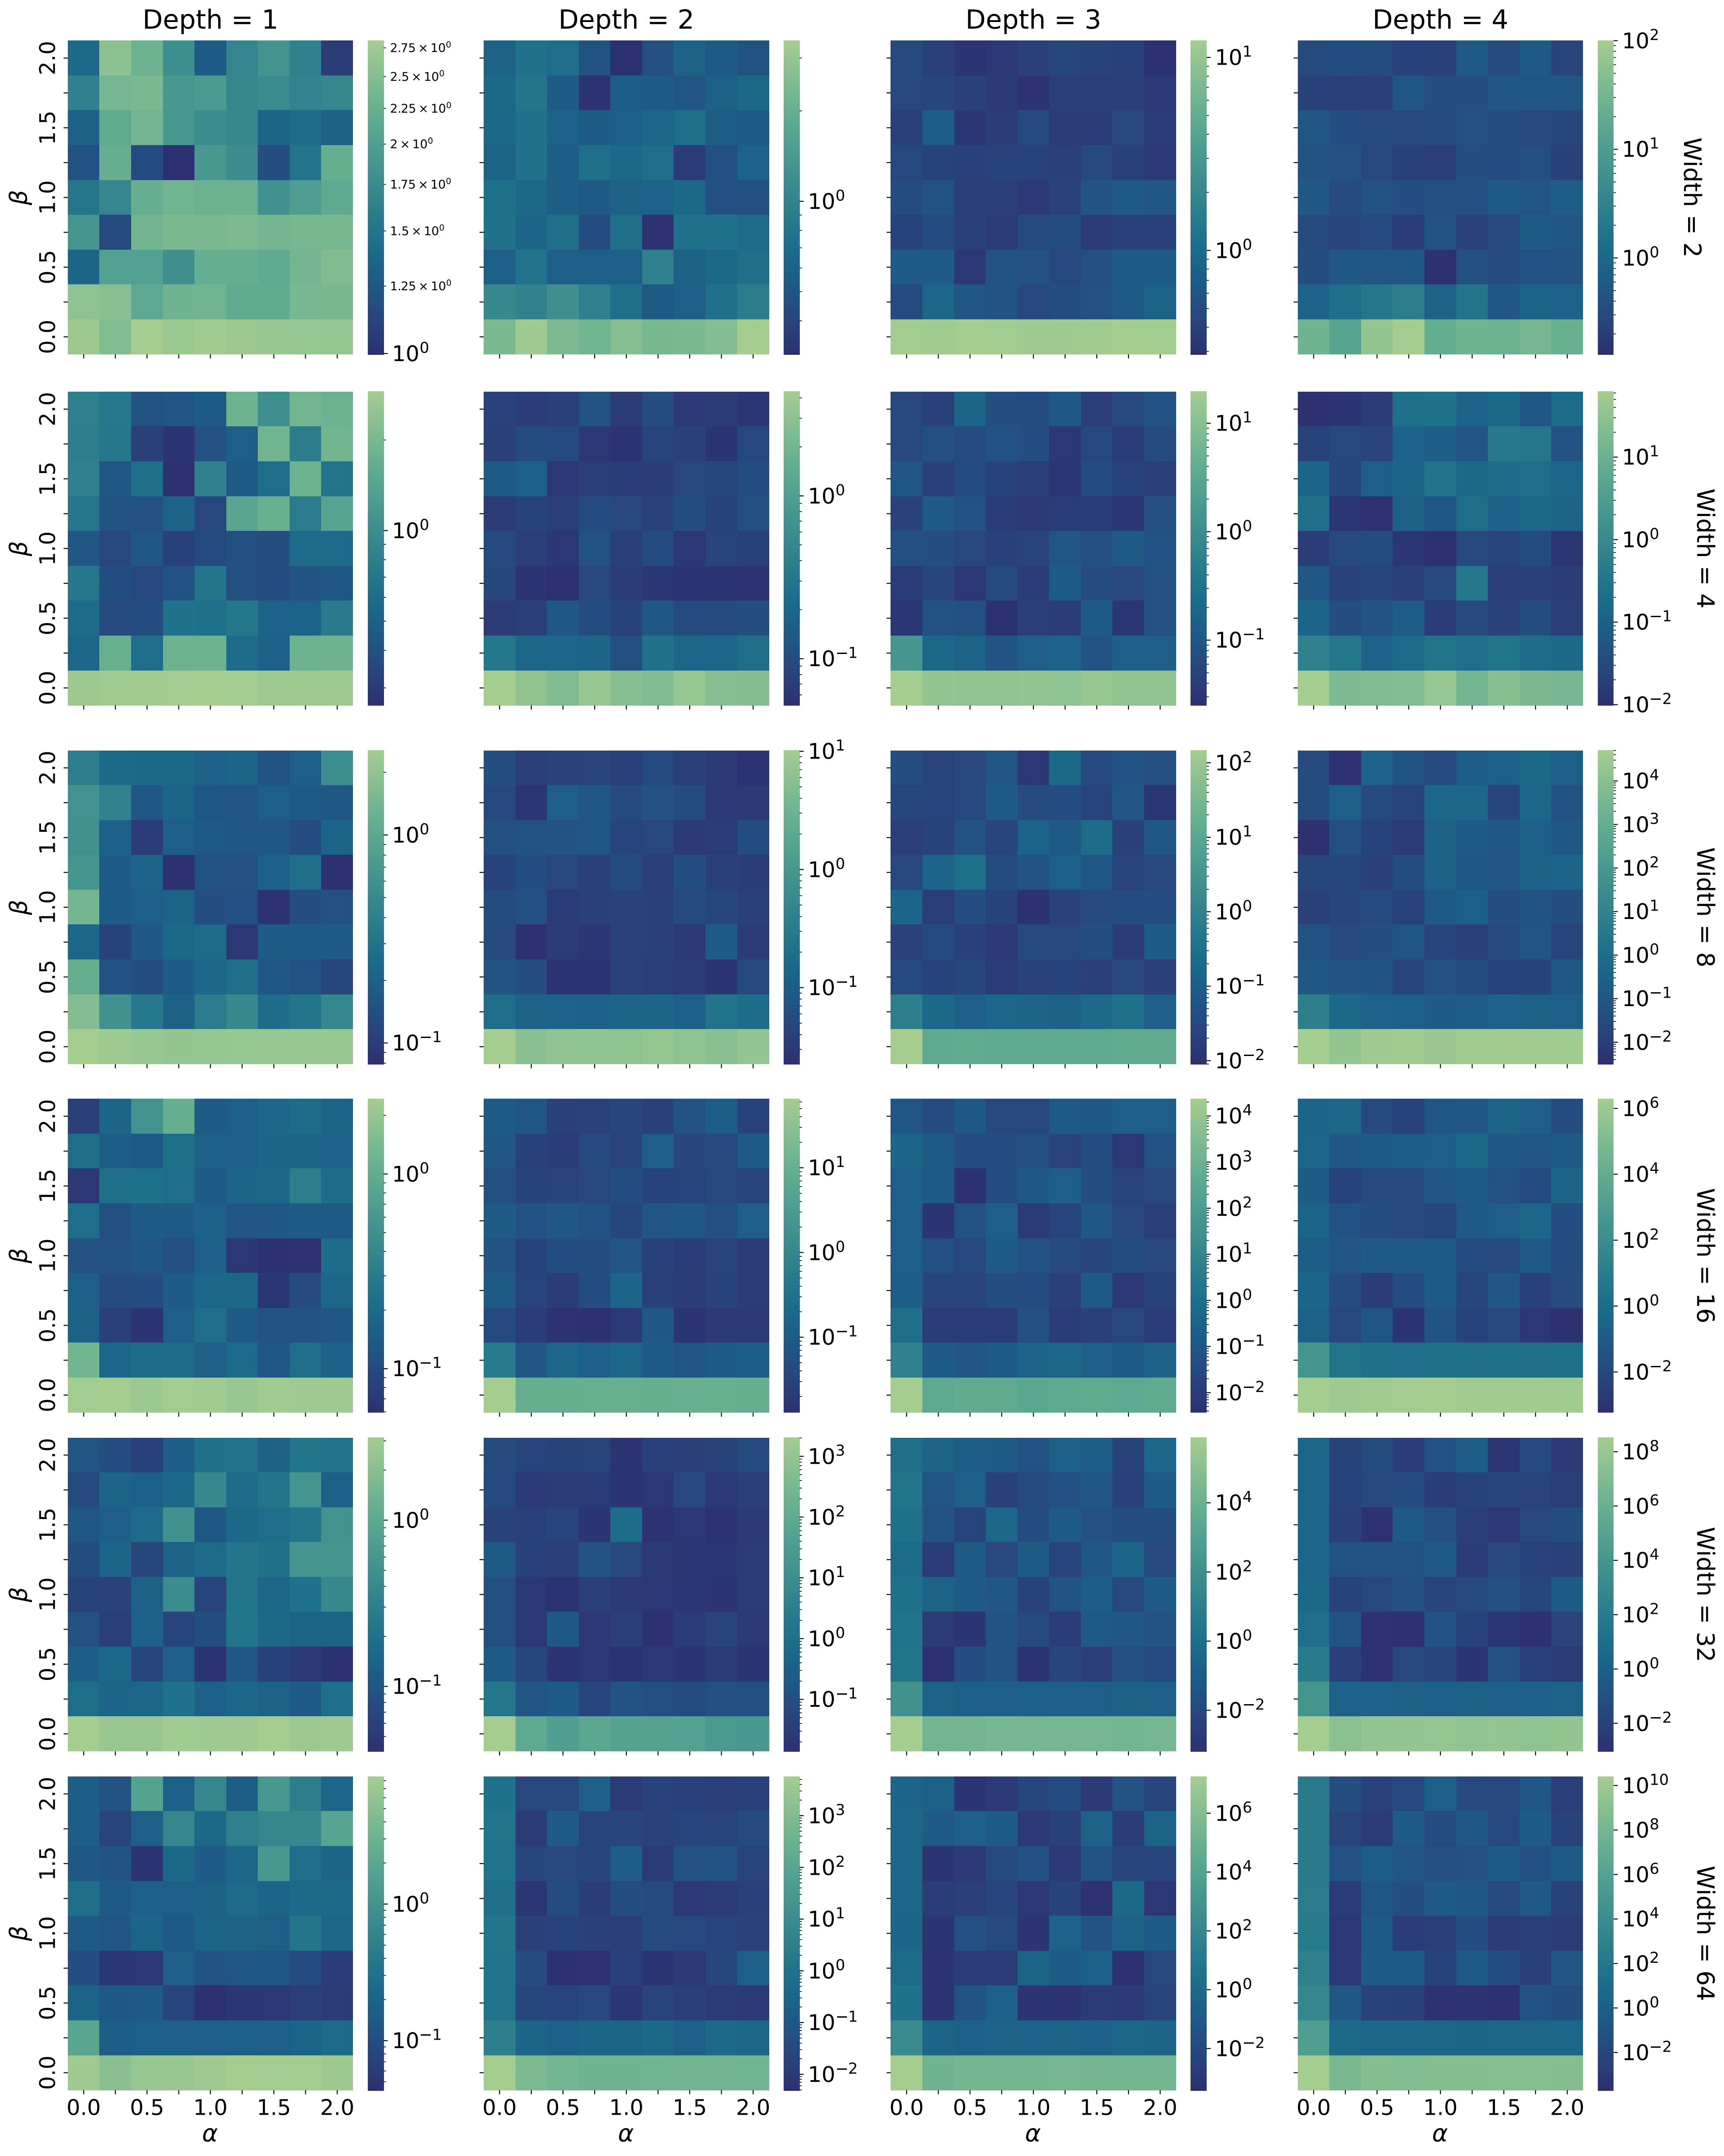

Supplement: supplementary_material [file G5_burgers.pdf › supplementary_plots/G5_burgers.pdf]

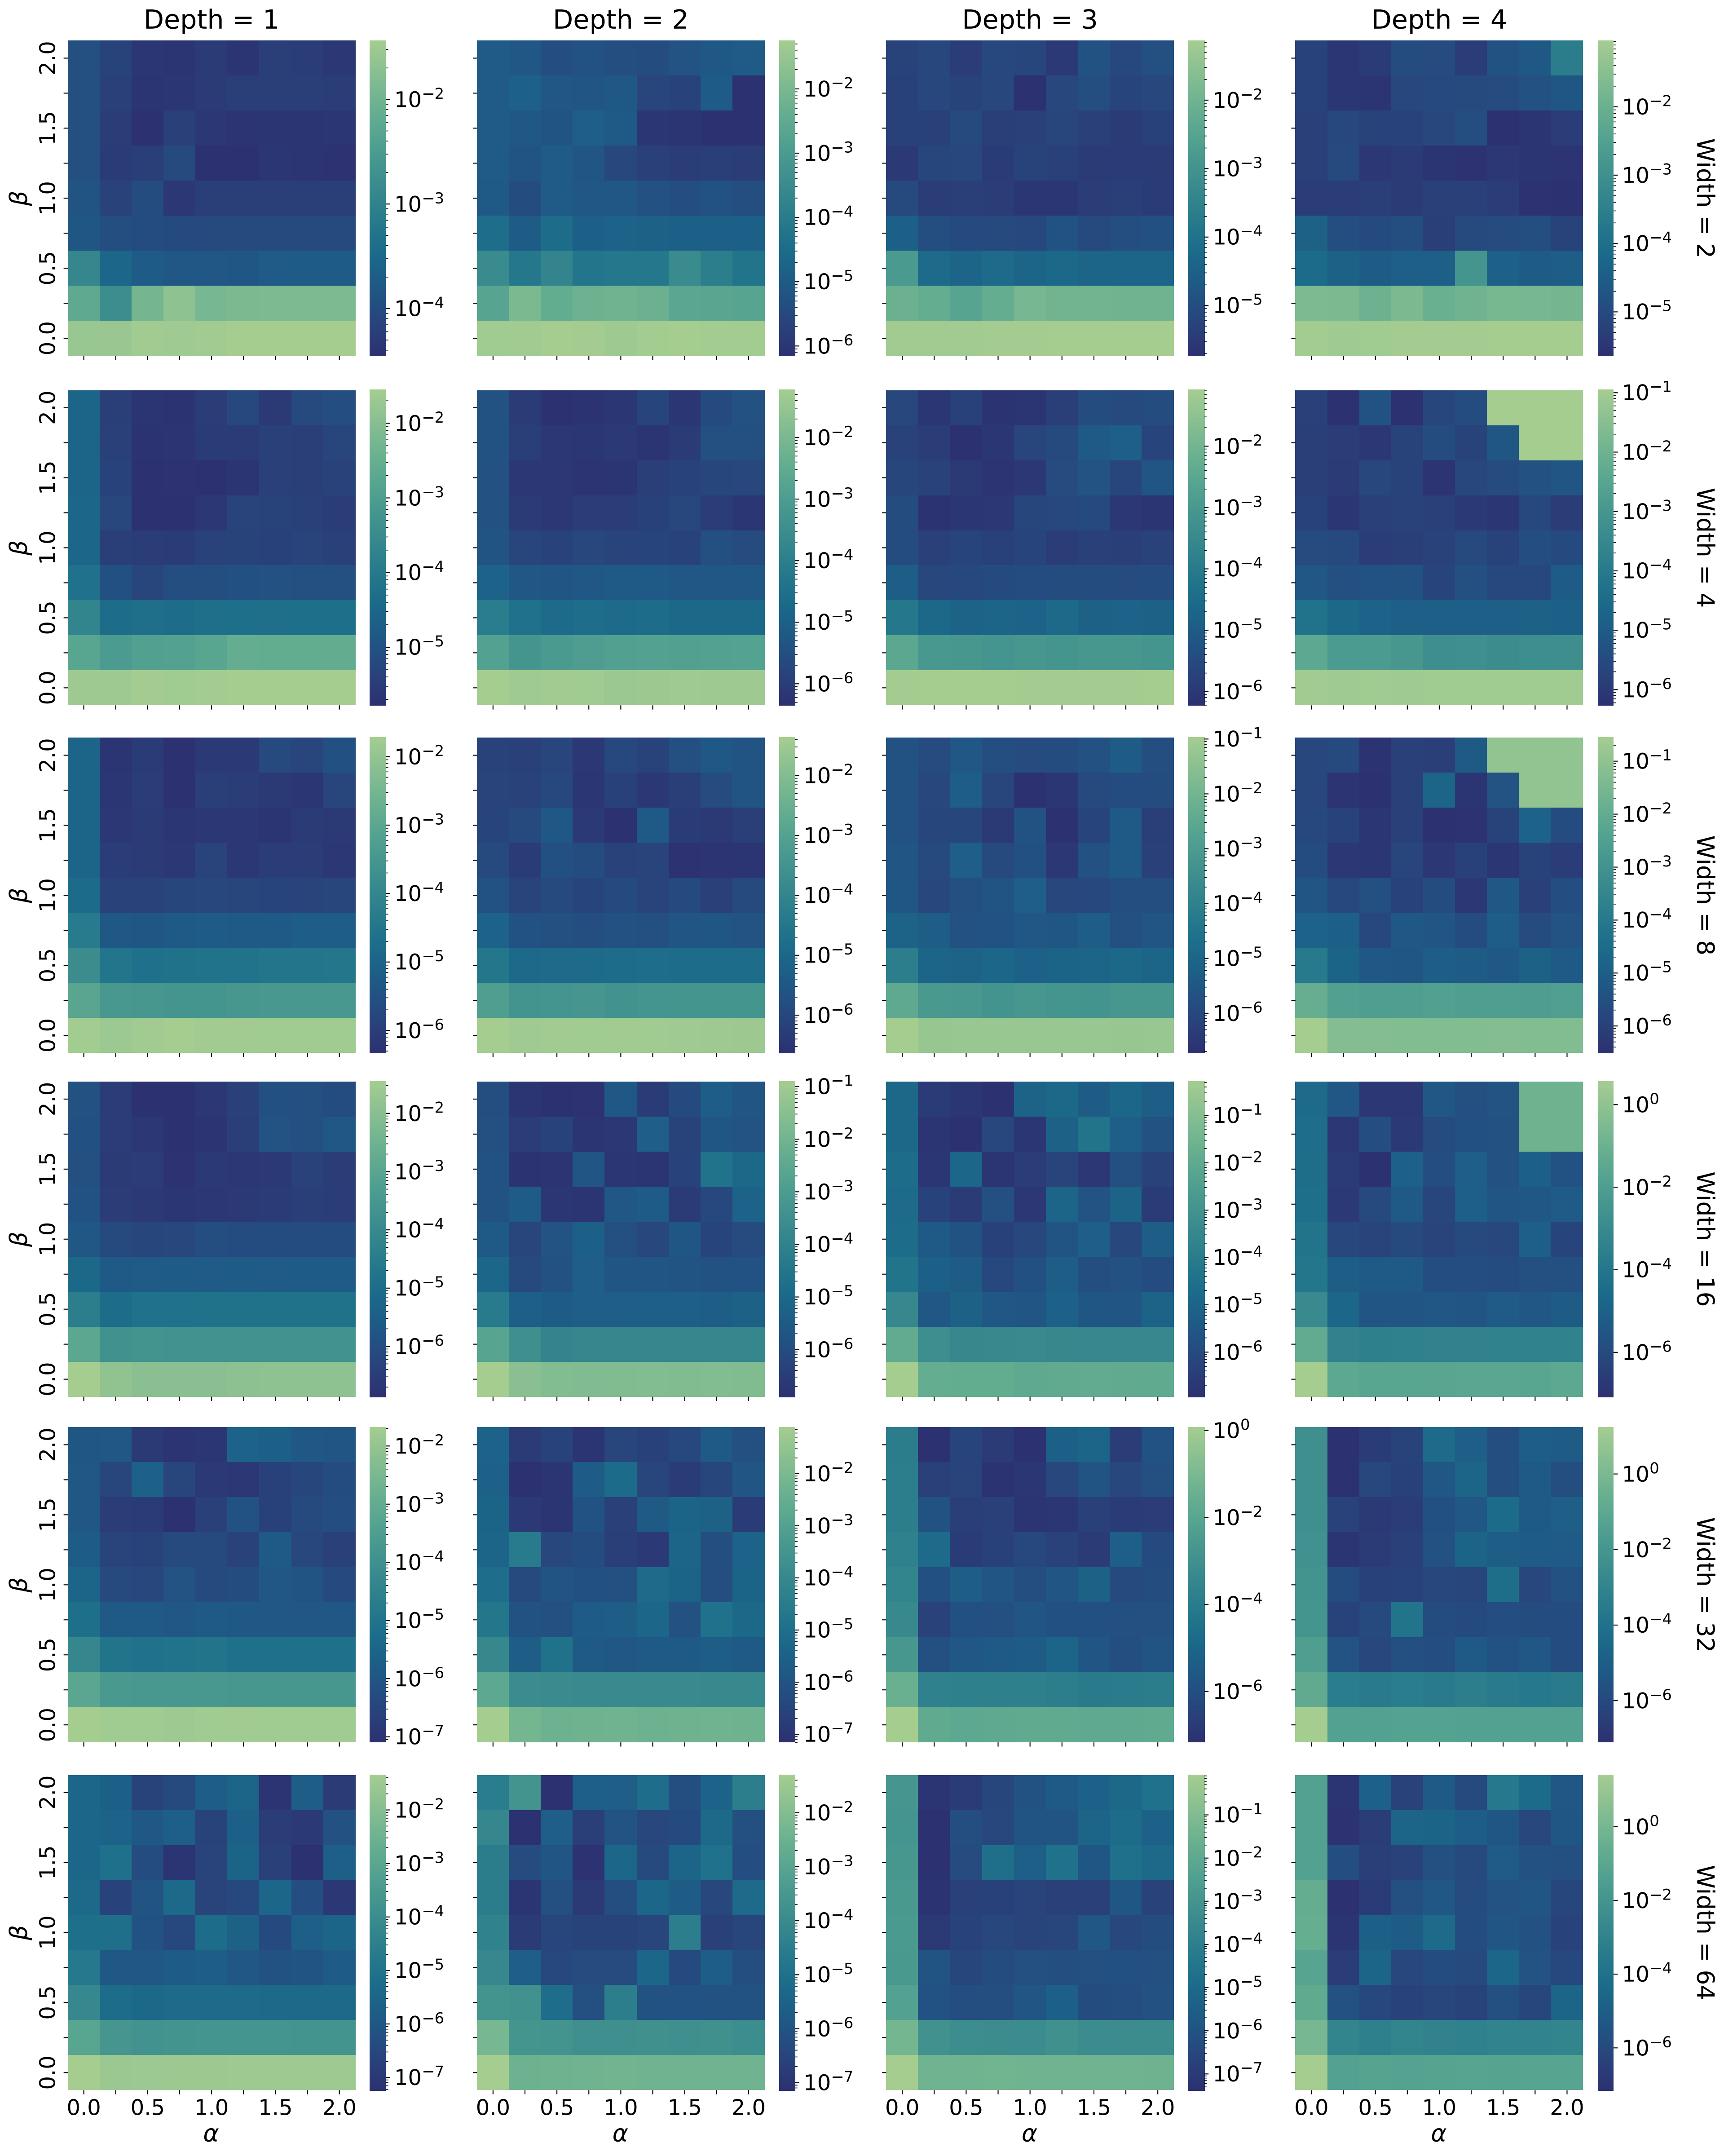

Supplement: supplementary_material [file G5_f1.pdf › supplementary_plots/G5_f1.pdf]

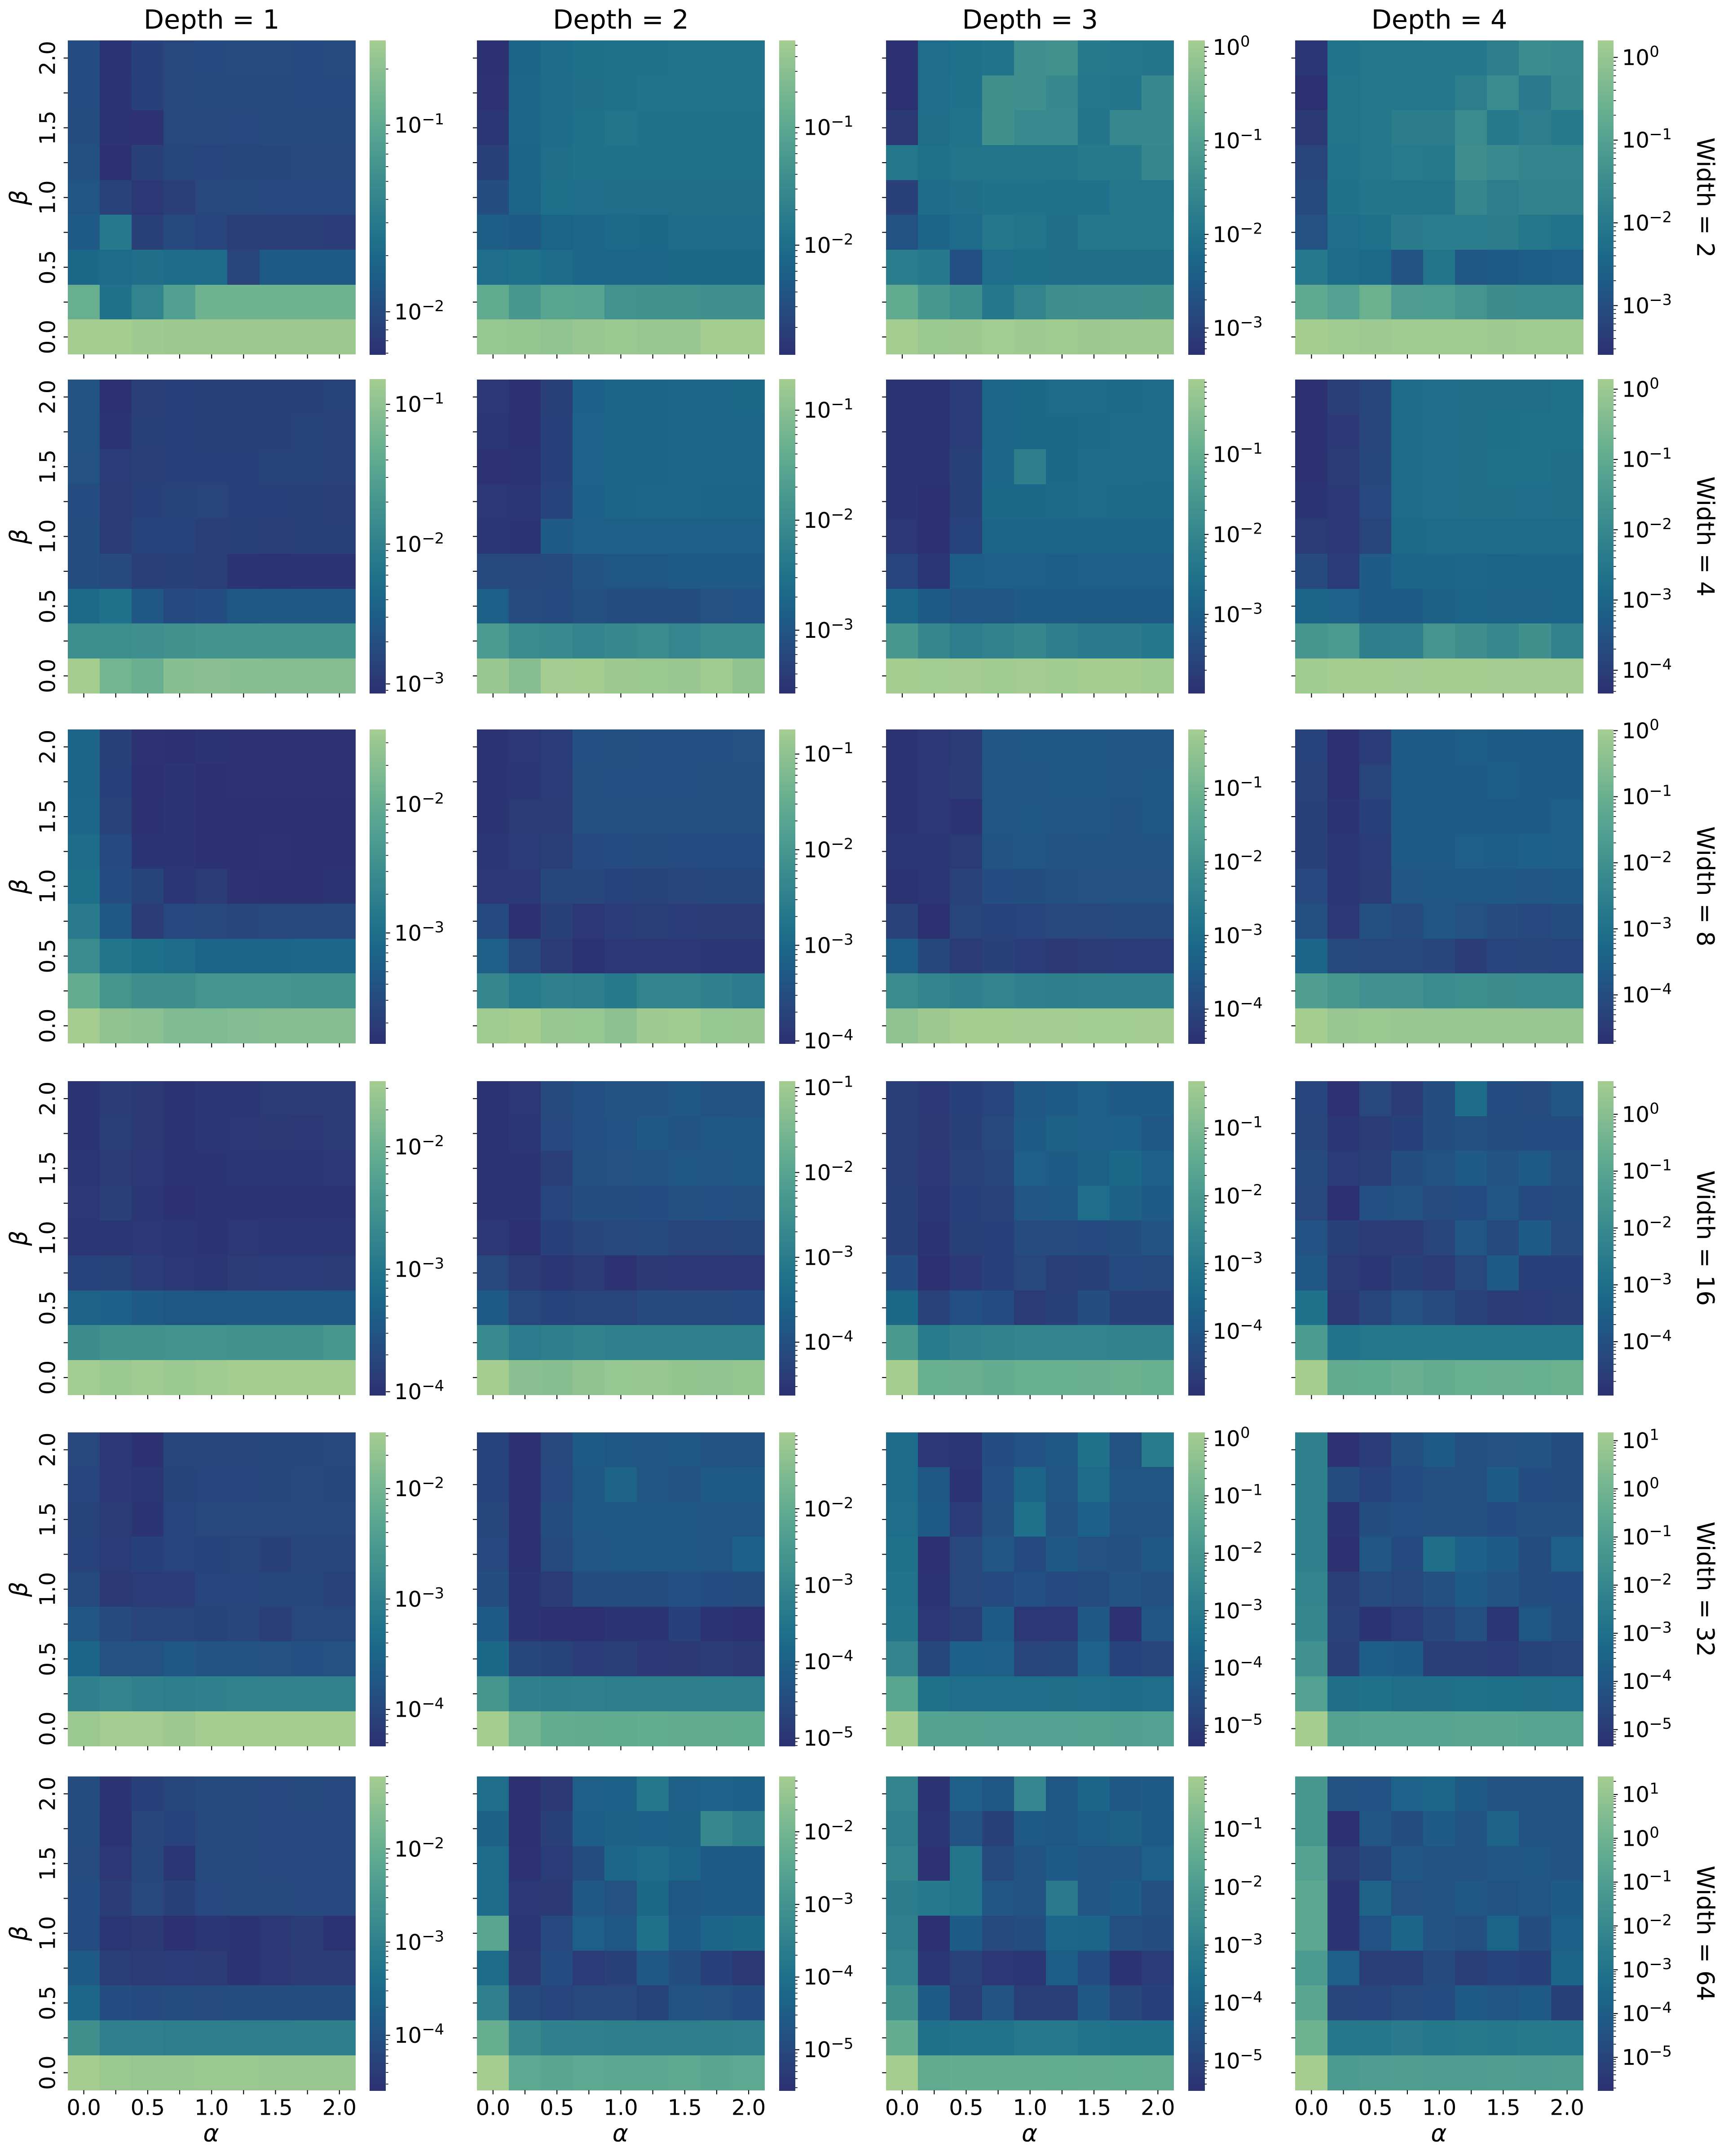

Supplement: supplementary_material [file G5_f2.pdf › supplementary_plots/G5_f2.pdf]

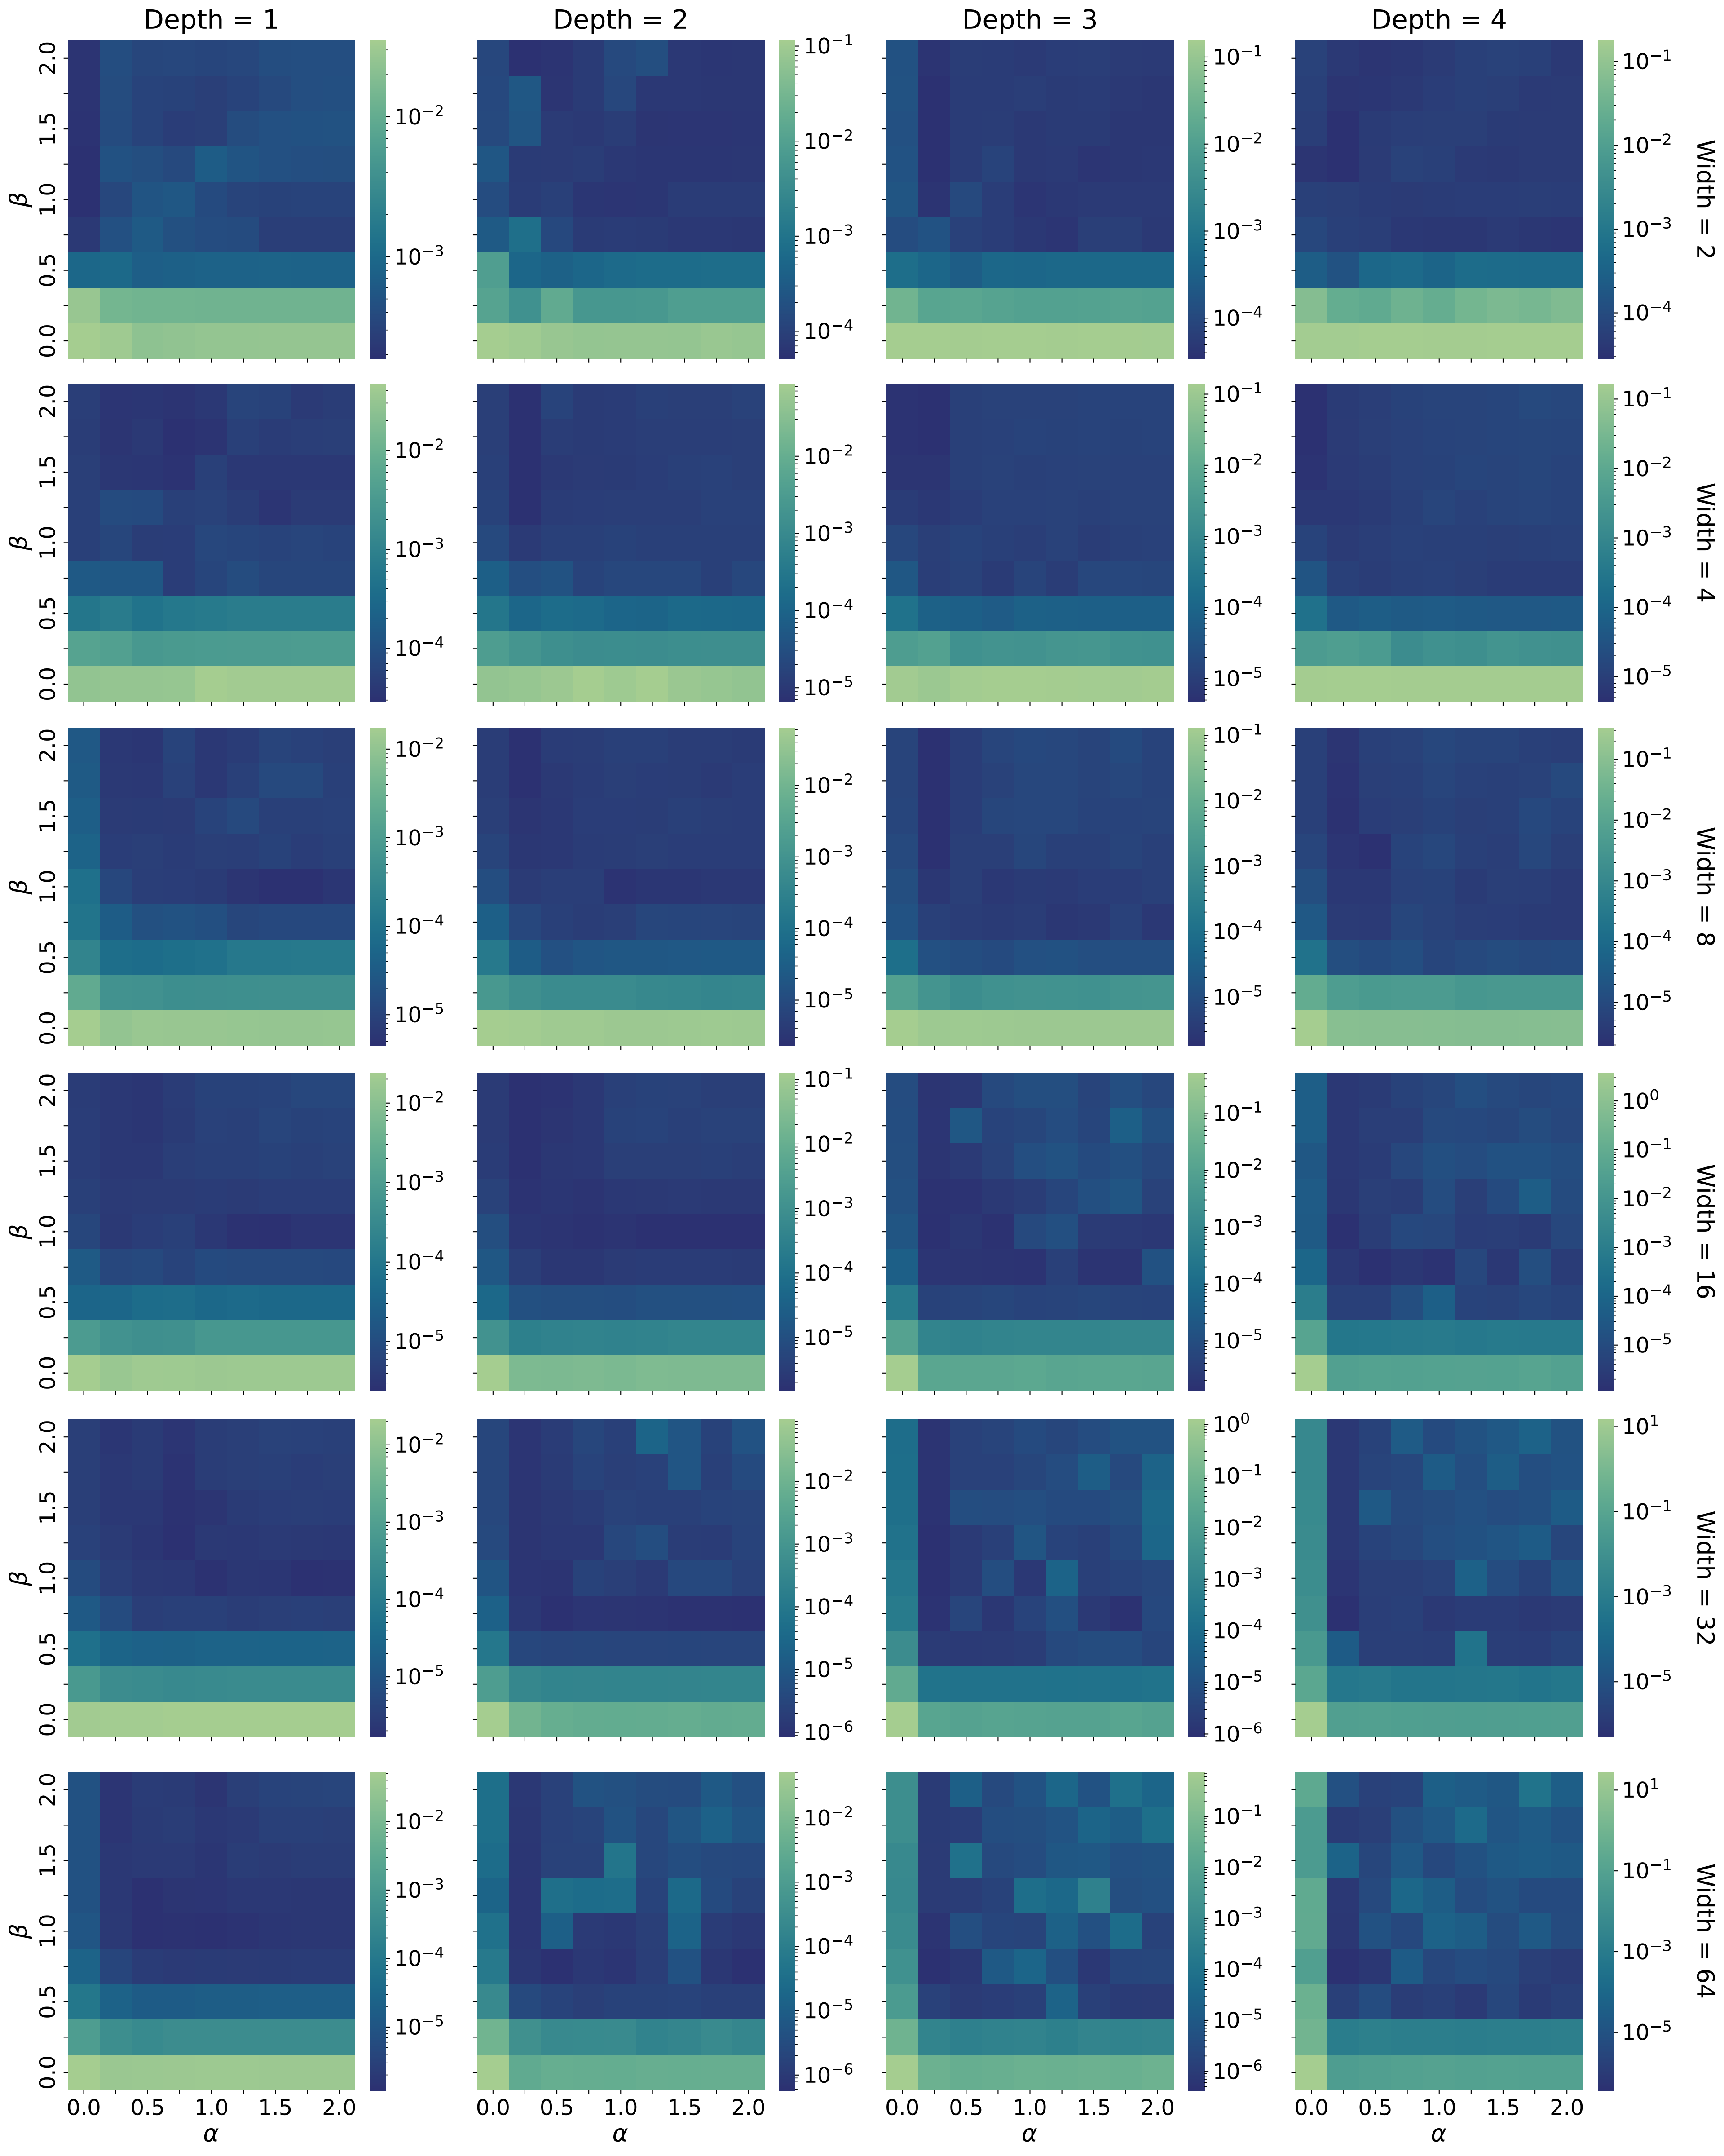

Supplement: supplementary_material [file G5_f3.pdf › supplementary_plots/G5_f3.pdf]

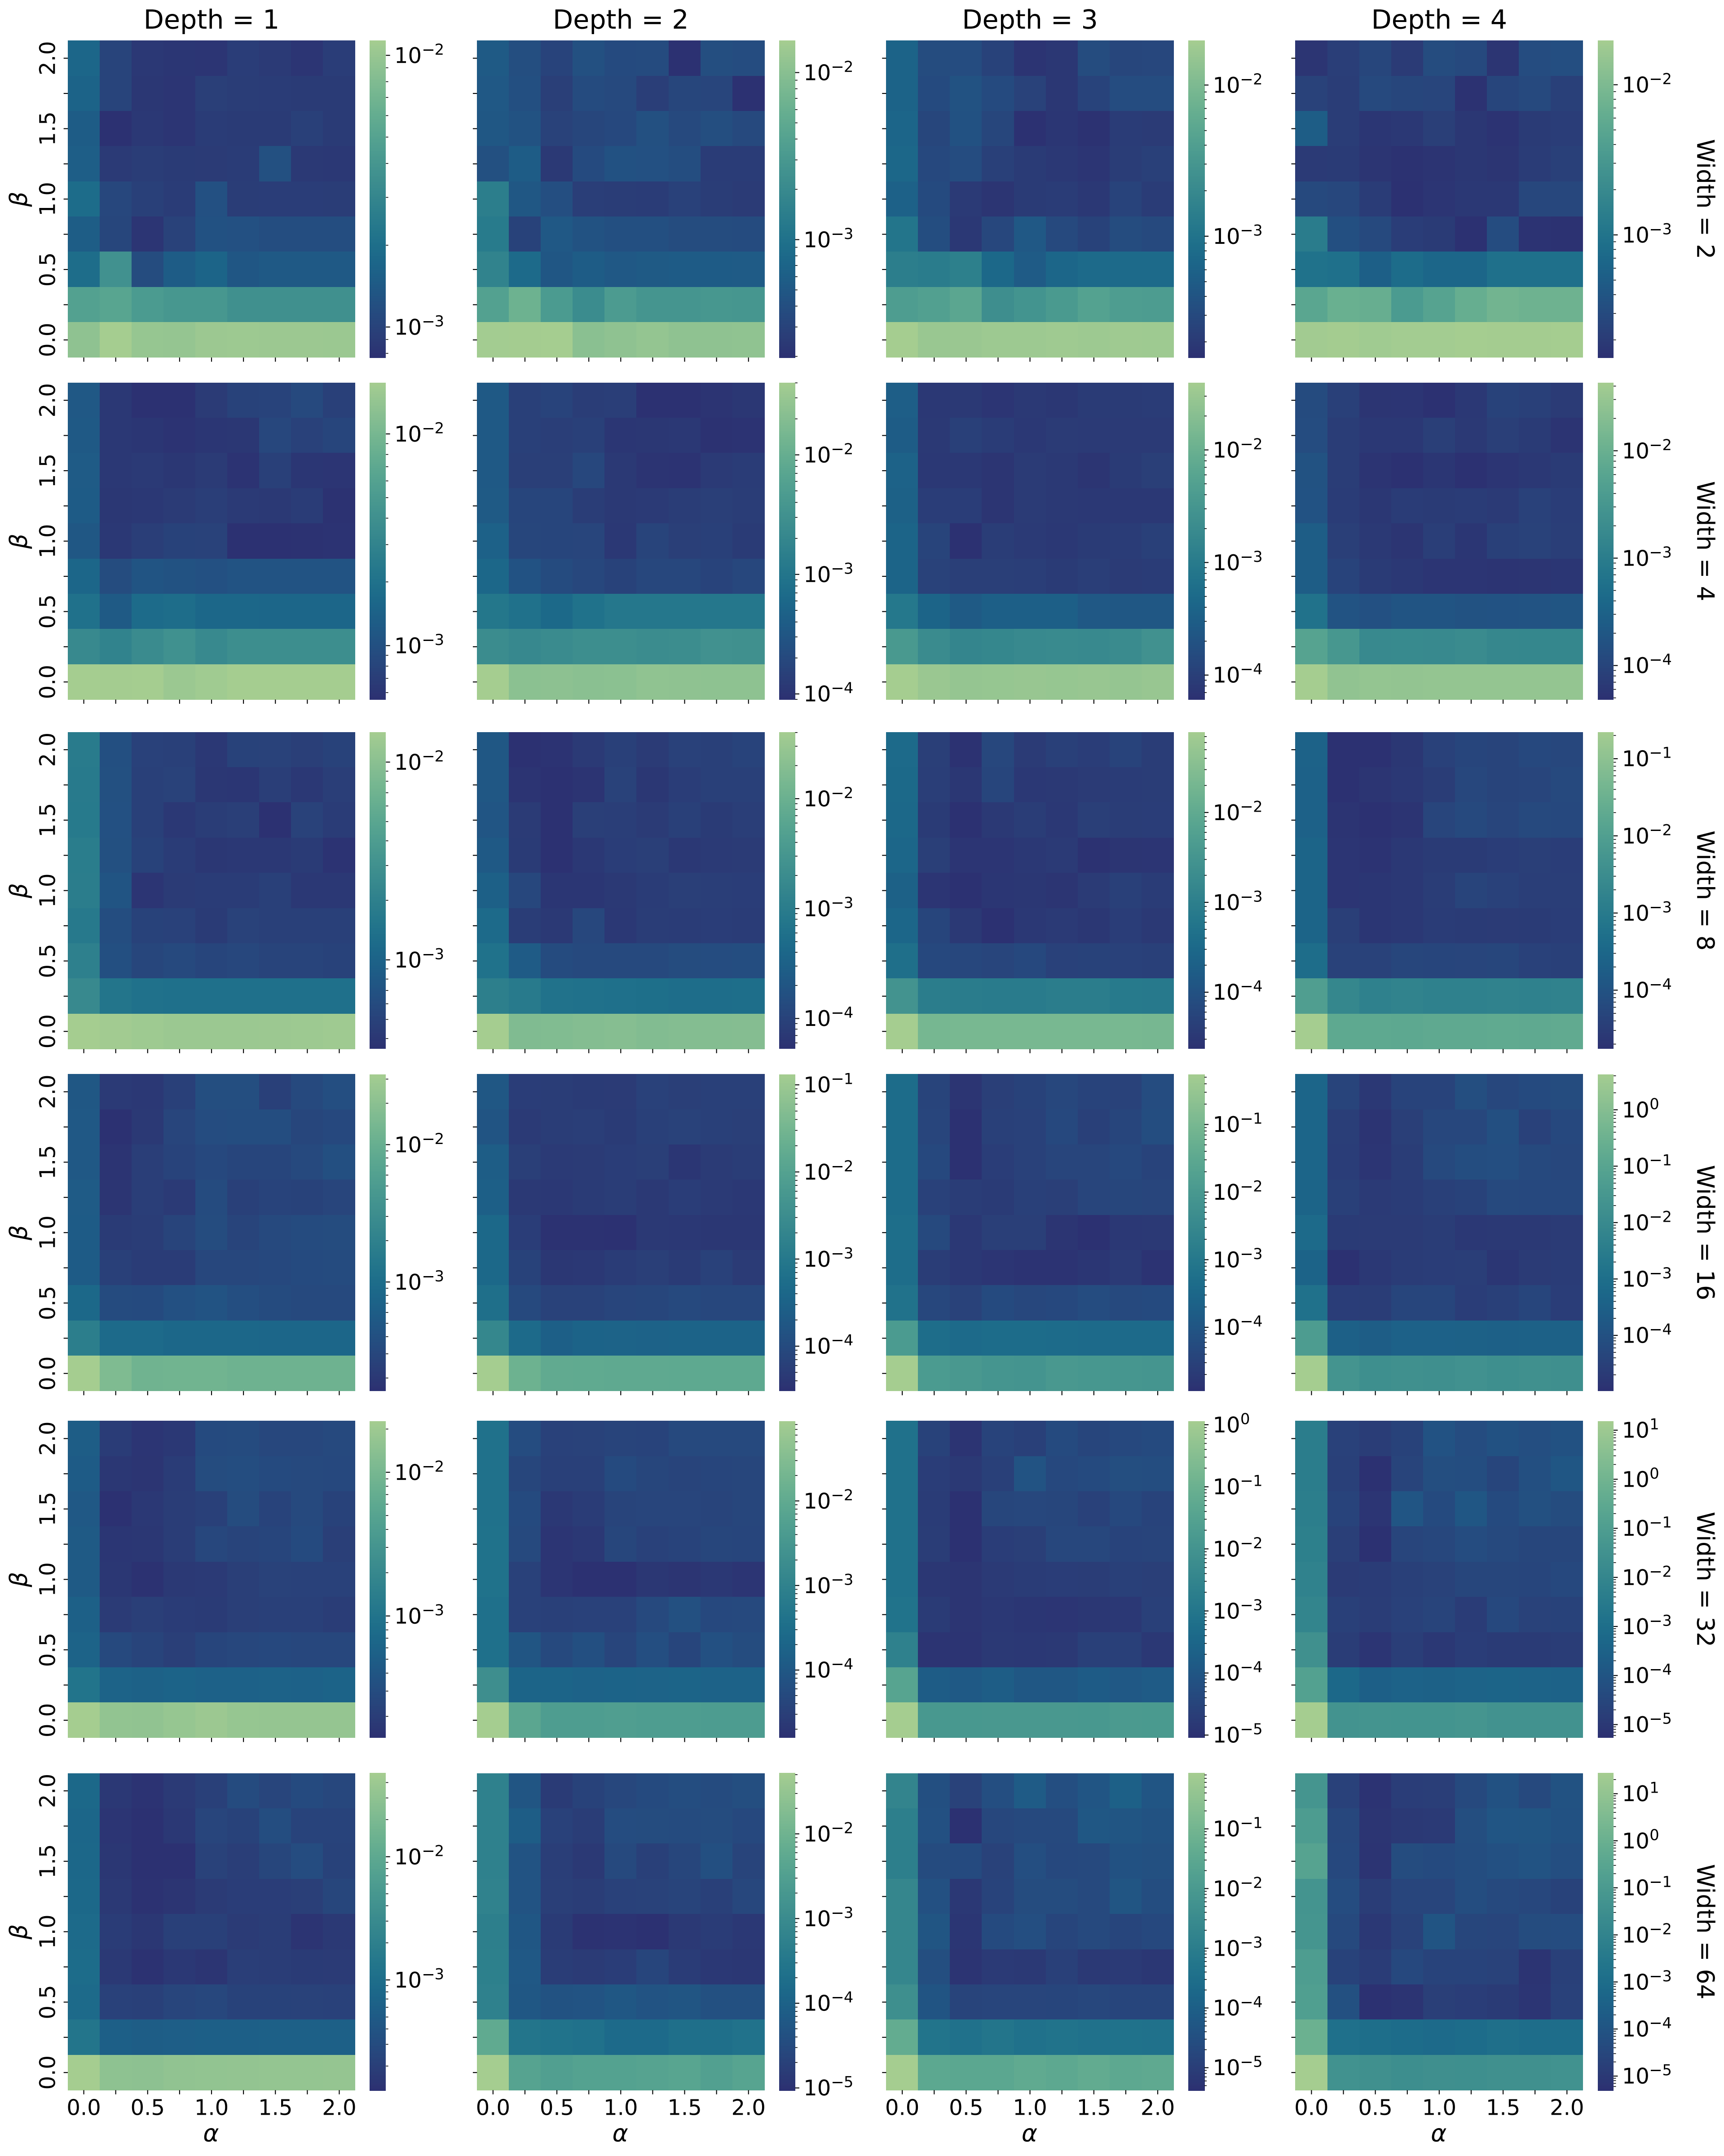

Supplement: supplementary_material [file G5_f4.pdf › supplementary_plots/G5_f4.pdf]

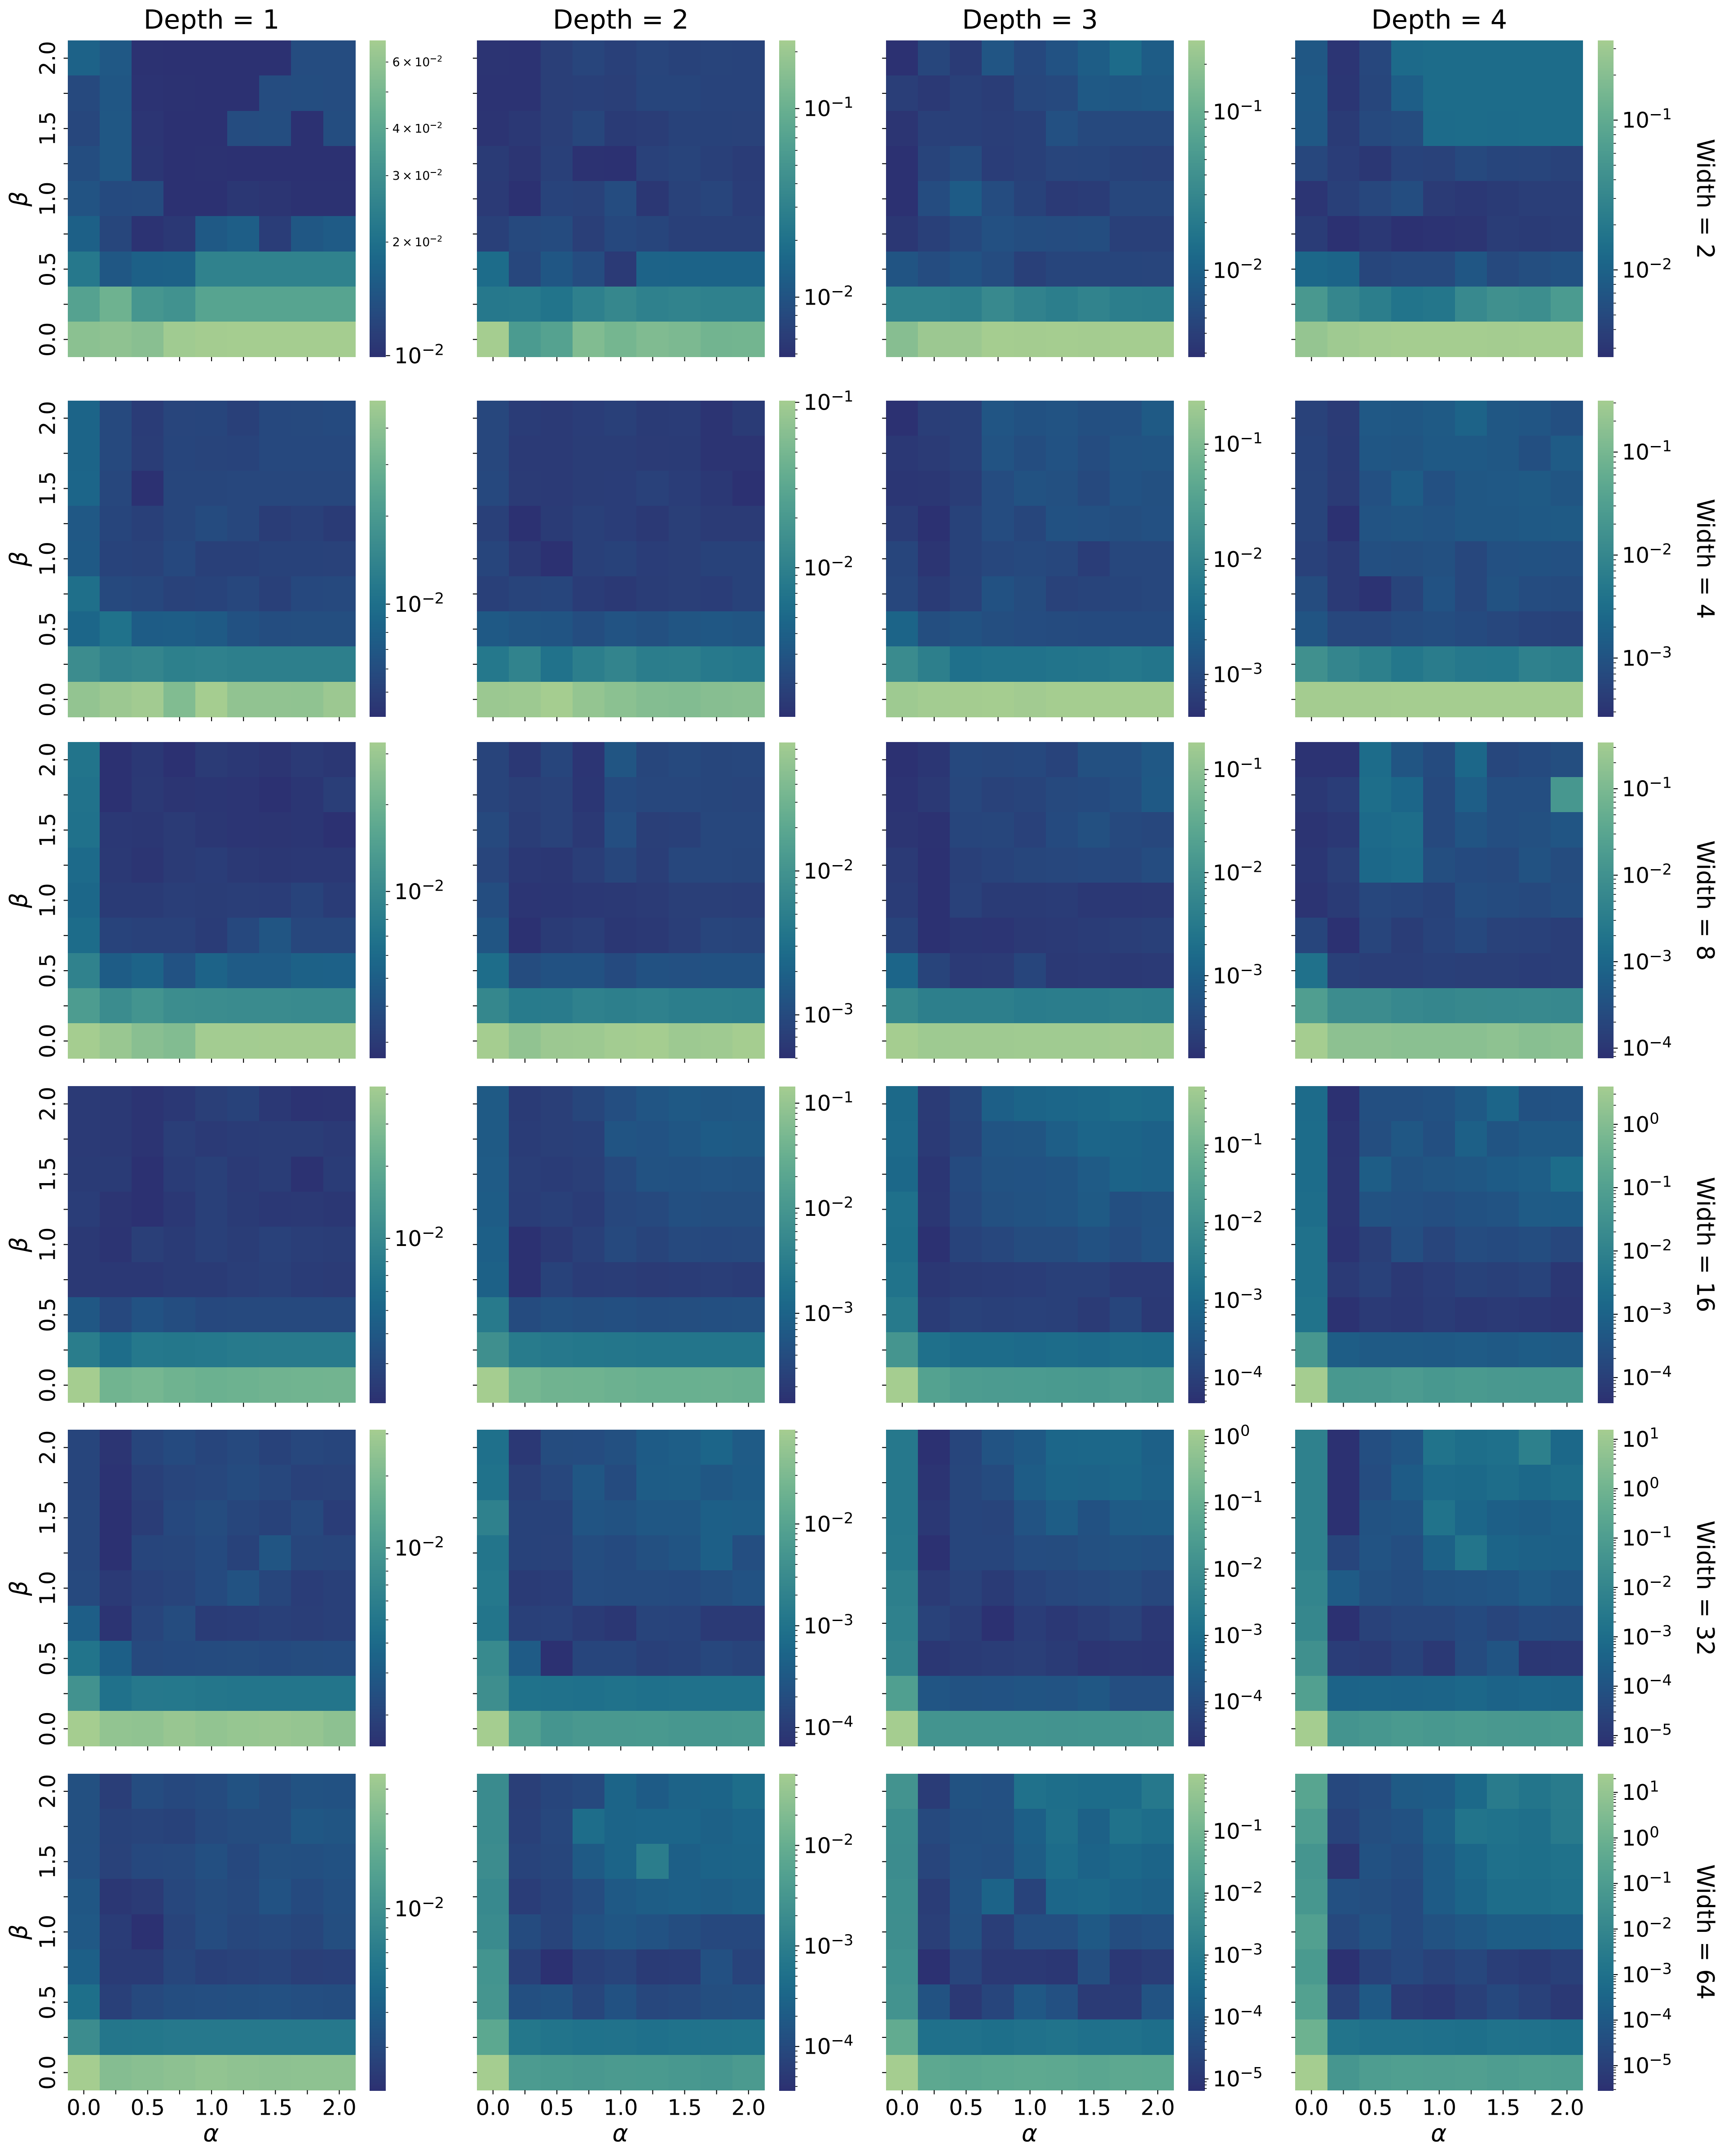

Supplement: supplementary_material [file G5_f5.pdf › supplementary_plots/G5_f5.pdf]

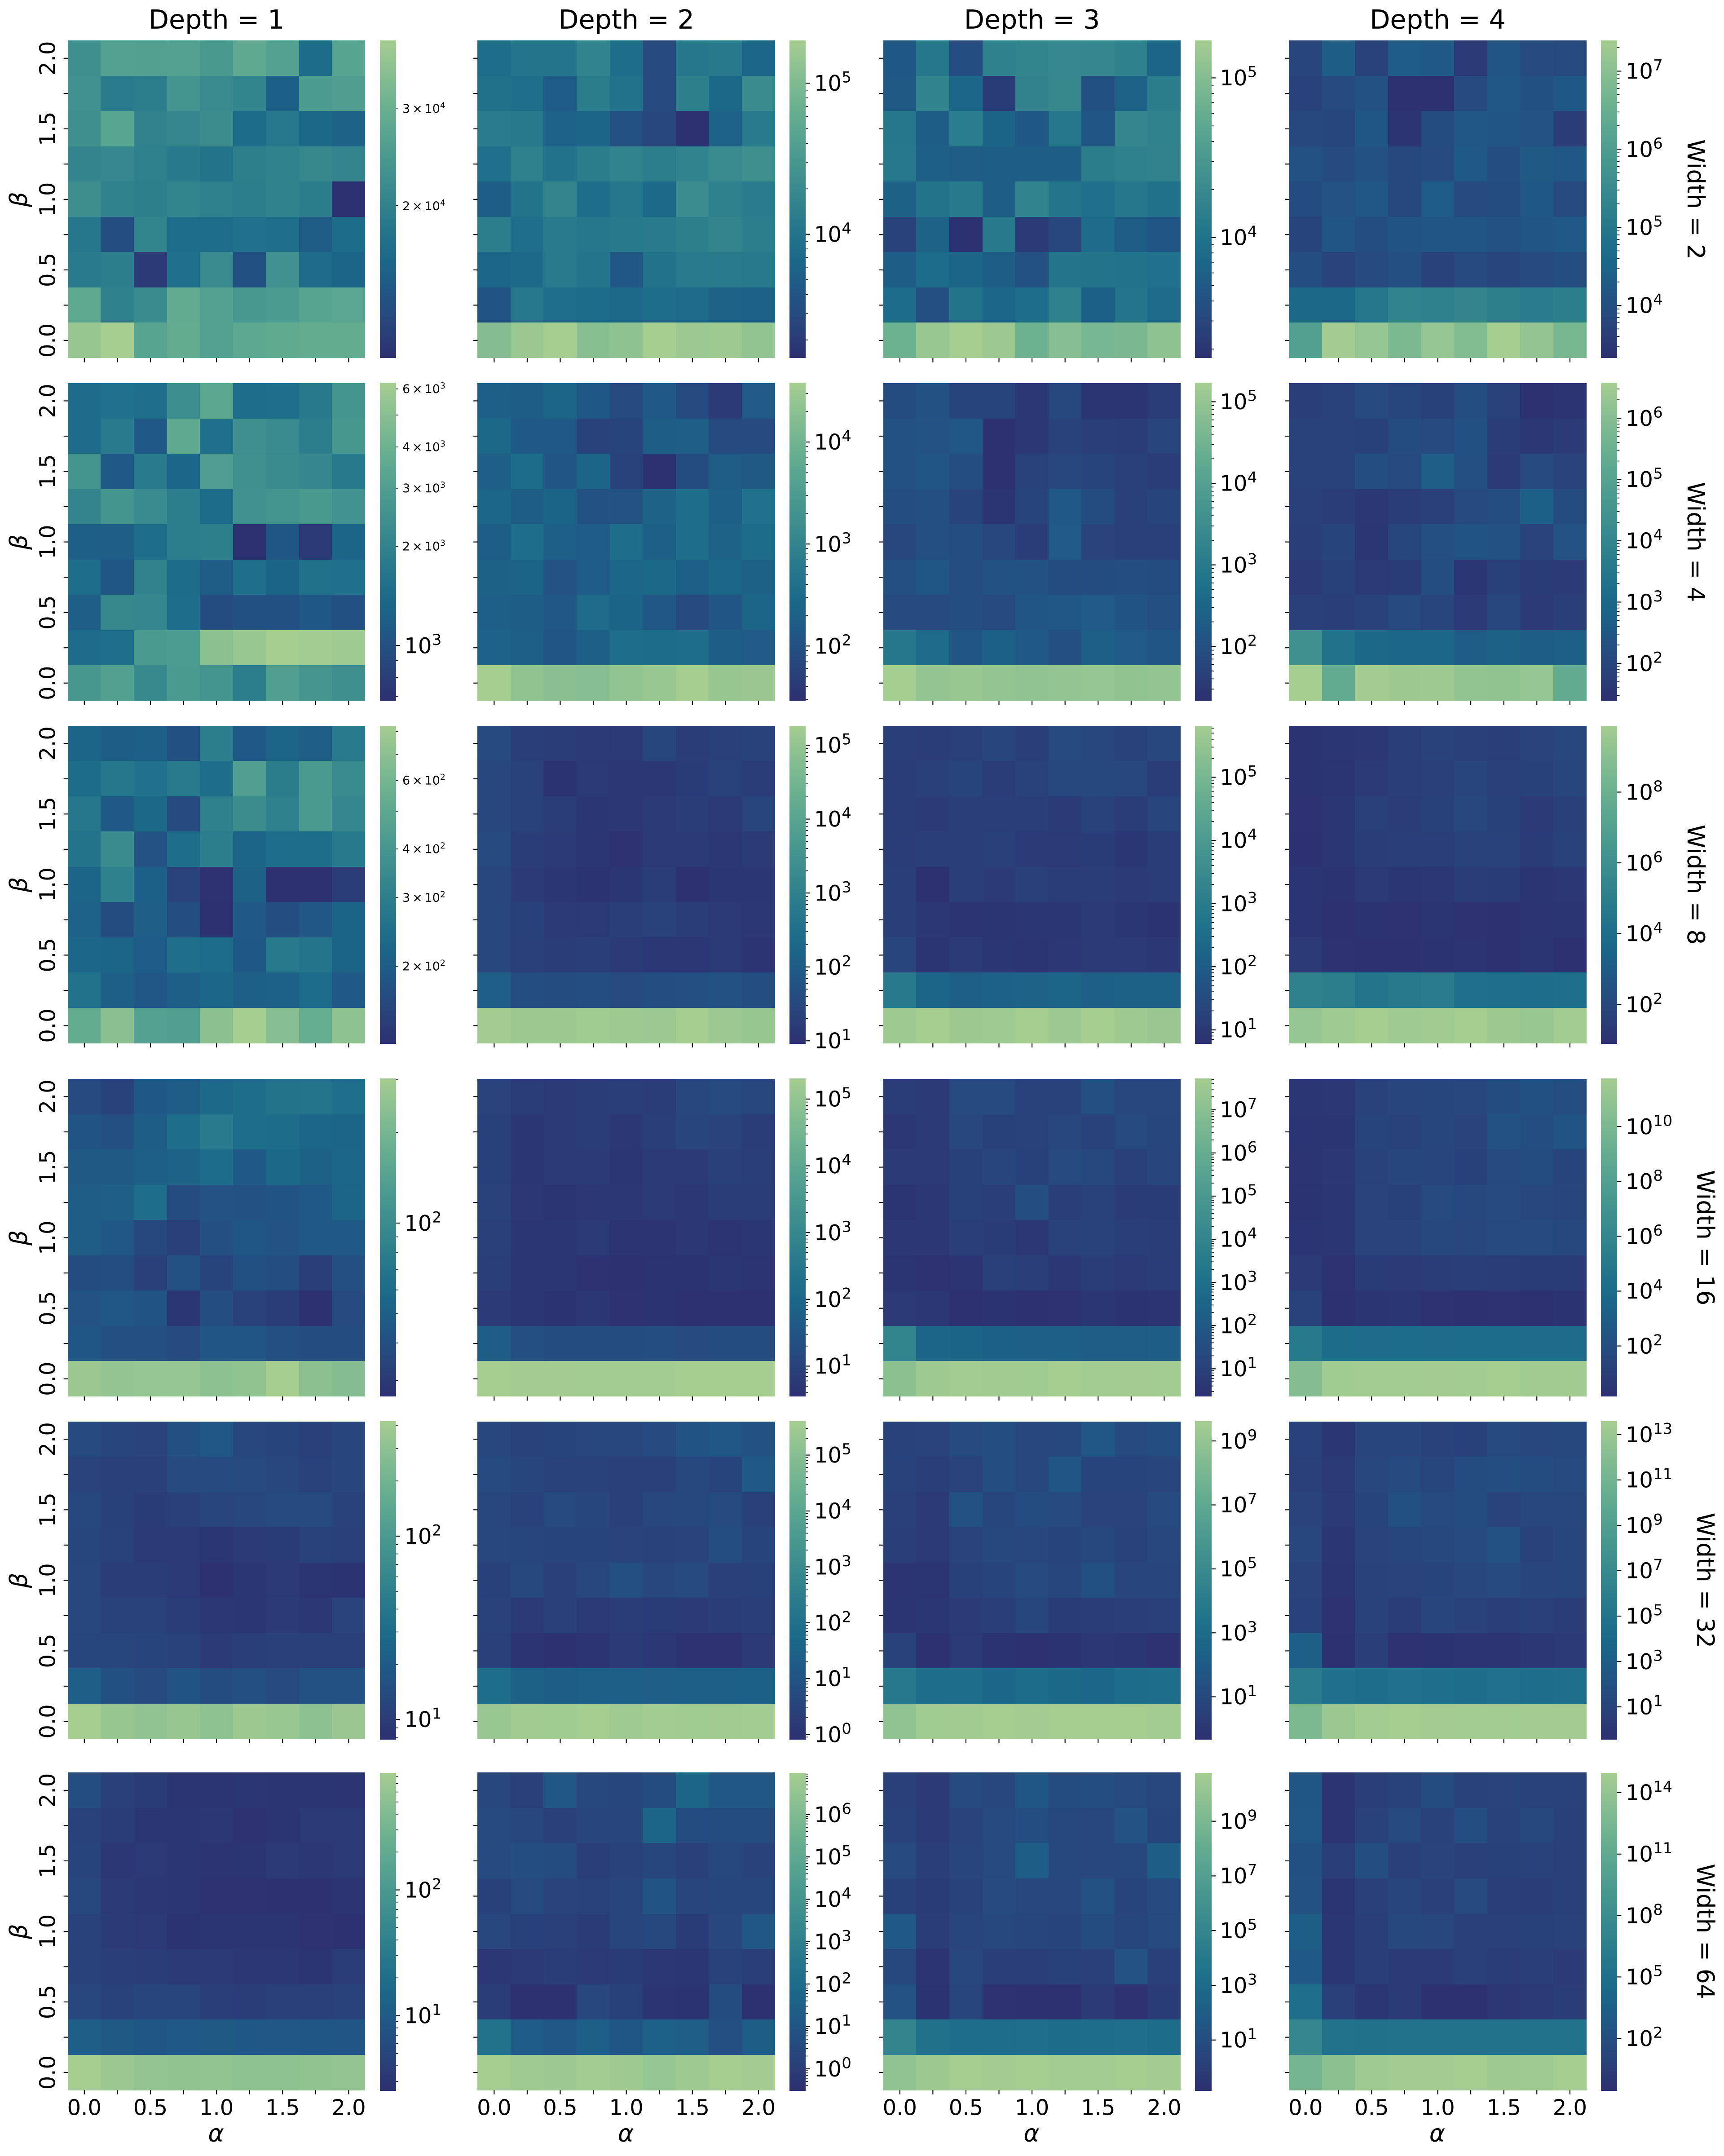

Supplement: supplementary_material [file G5_helmholtz.pdf › supplementary_plots/G5_helmholtz.pdf]

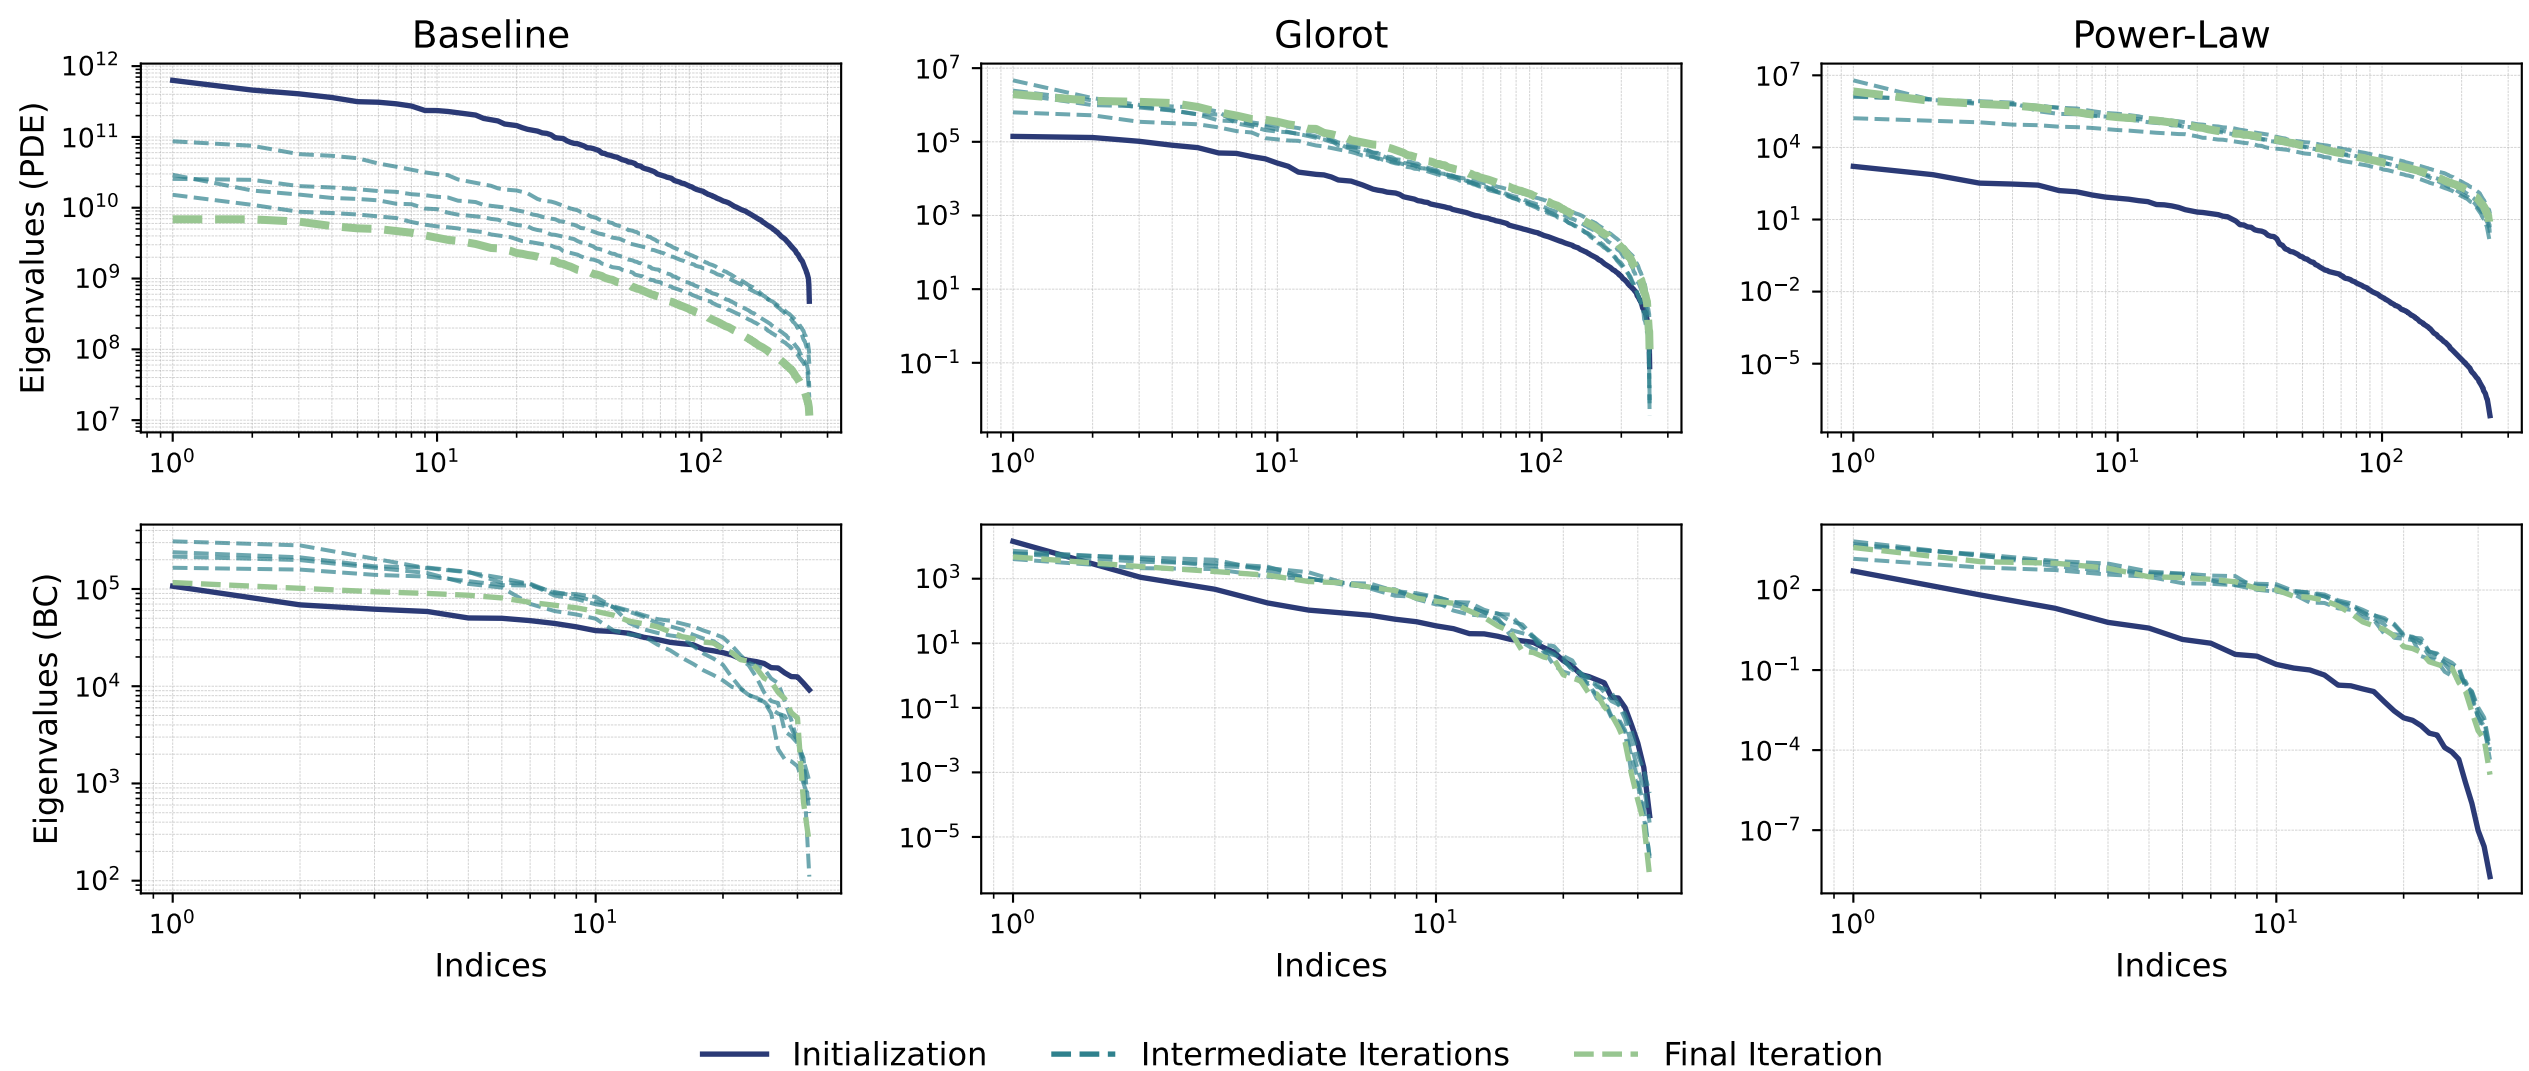

Supplement: supplementary_material [file ntk_burgers.pdf › supplementary_plots/ntk_burgers.pdf]

Baseline

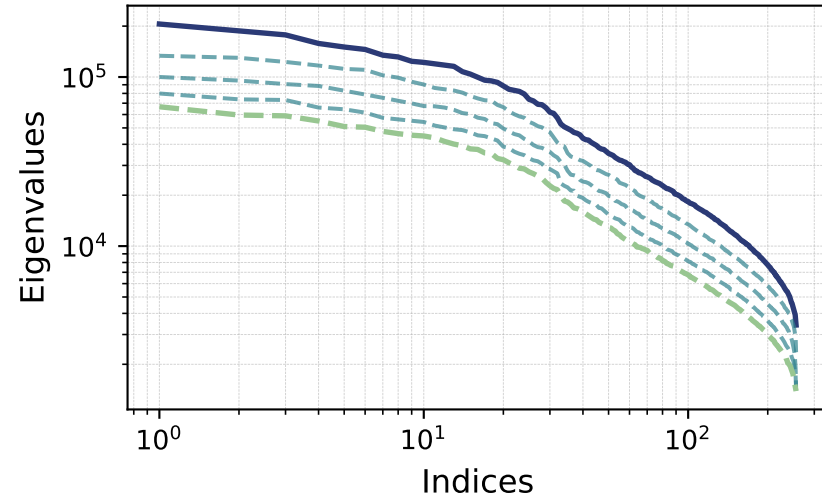

Glorot

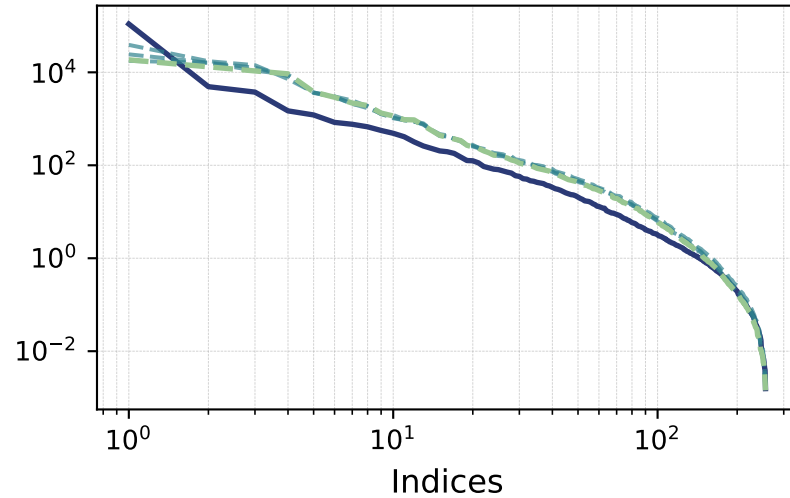

Power-Law

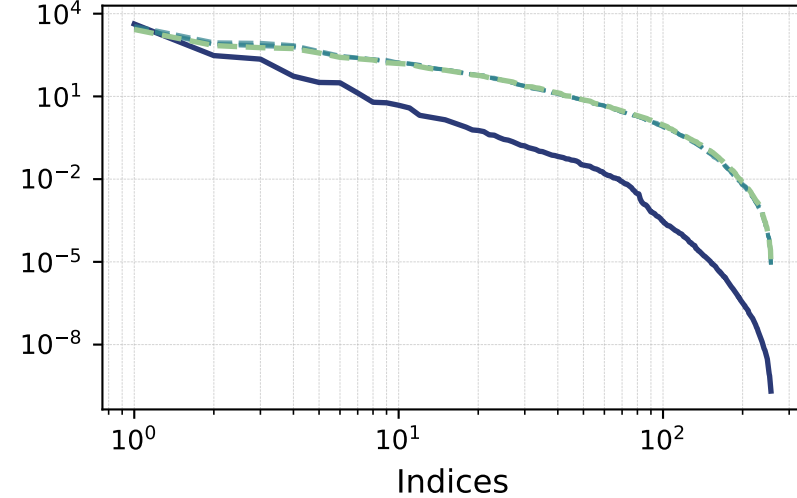

— Initialization

- - Intermediate Iterations

- - Final Iteration

Supplement: supplementary_material [file ntk_f1.pdf › supplementary_plots/ntk_f1.pdf]

Baseline

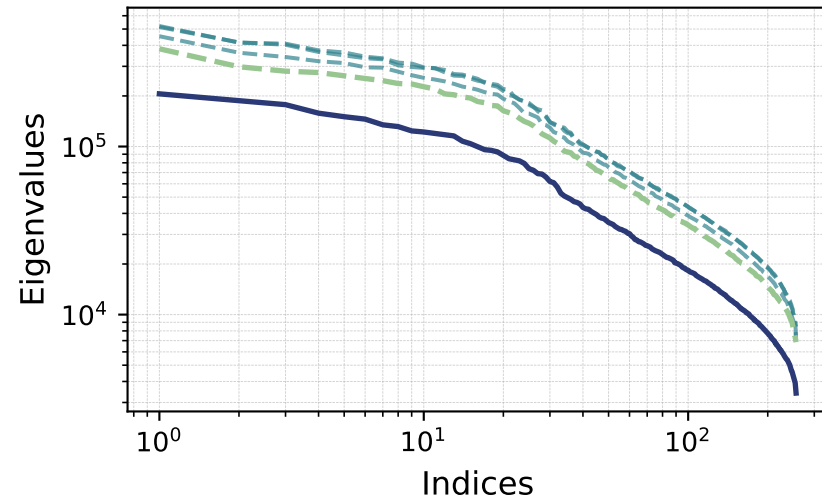

Glorot

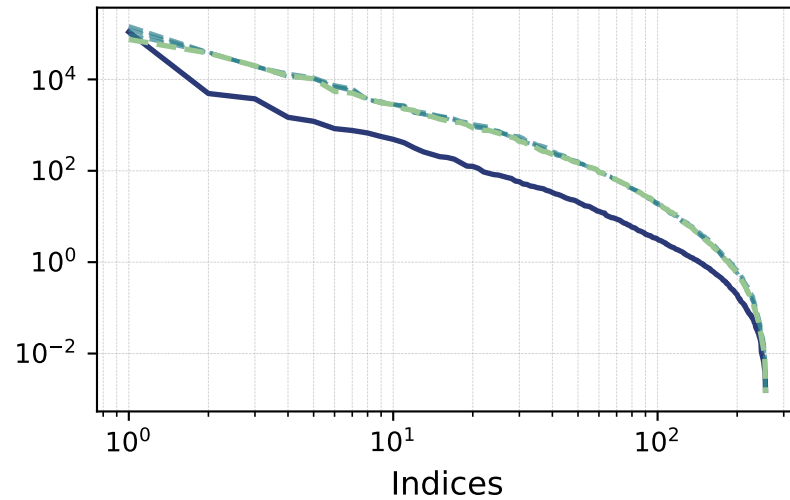

Power-Law

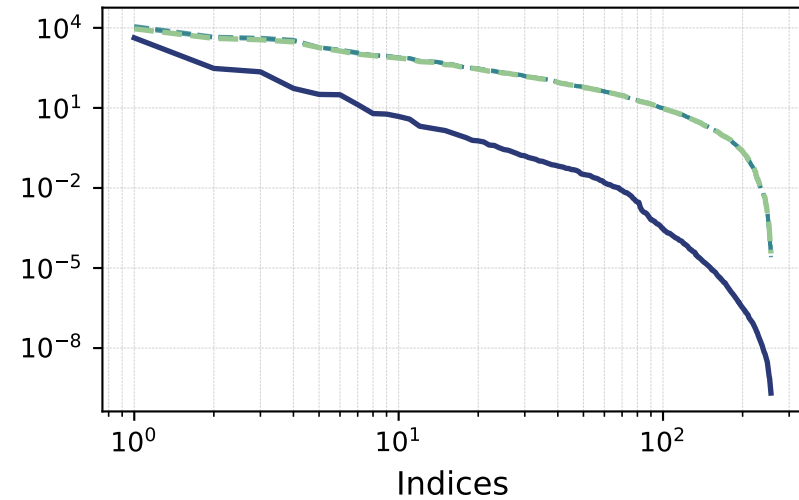

— Initialization    - - - Intermediate Iterations    - - - Final Iteration

Supplement: supplementary_material [file ntk_f2.pdf › supplementary_plots/ntk_f2.pdf]

Baseline

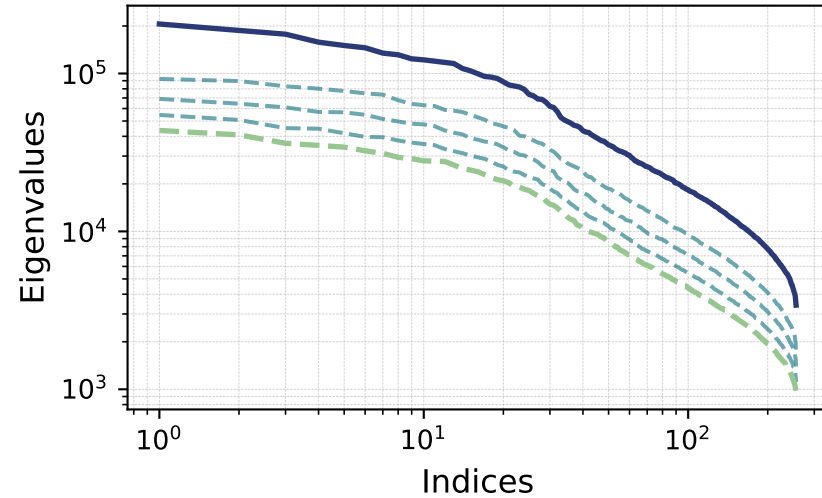

Glorot

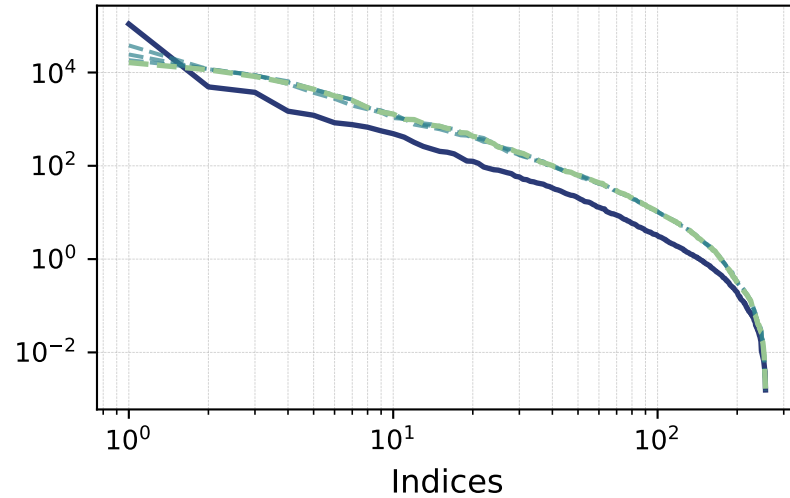

Power-Law

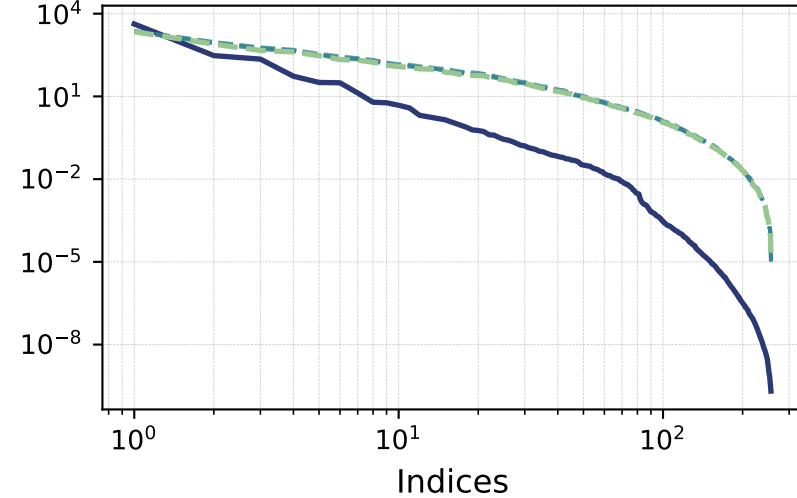

— Initialization    - - - Intermediate Iterations    - - - Final Iteration

Supplement: supplementary_material [file ntk_f4.pdf › supplementary_plots/ntk_f4.pdf]

Baseline

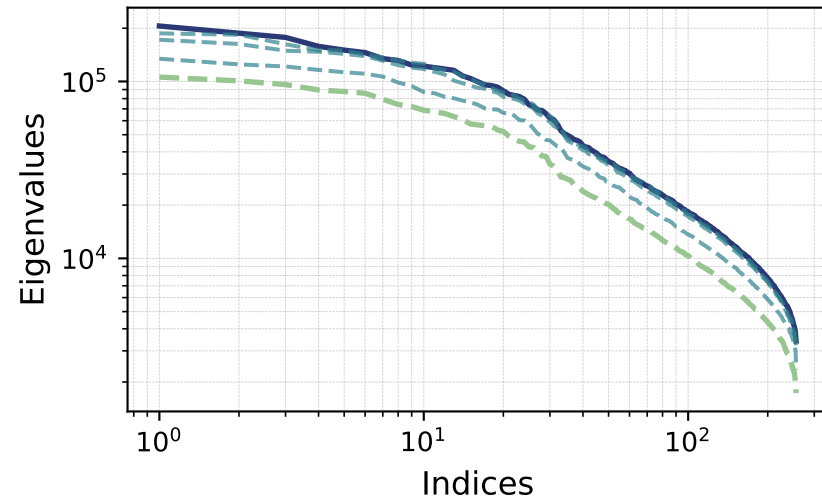

Glorot

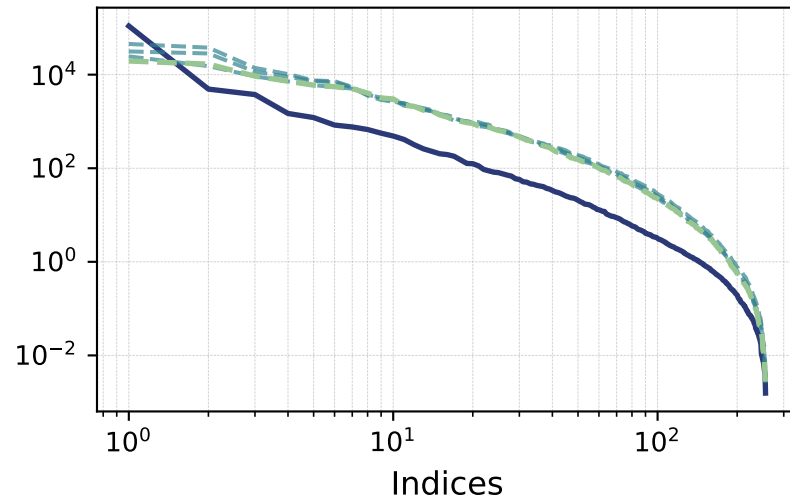

Power-Law

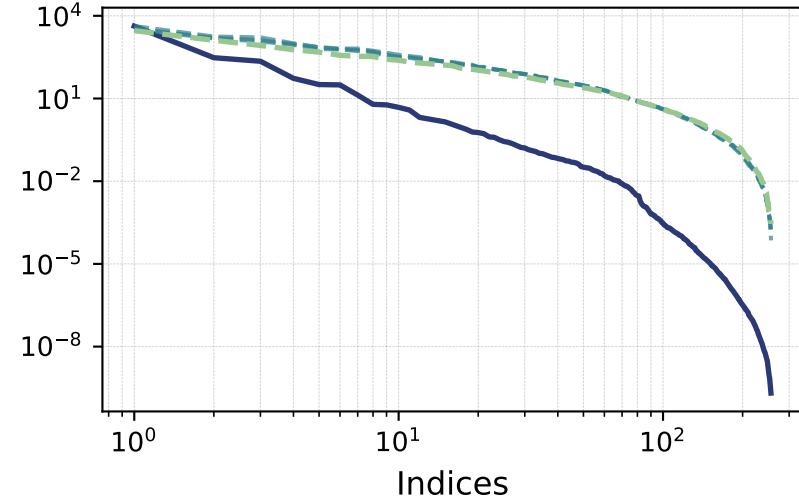

— Initialization    - - - Intermediate Iterations    - - - Final Iteration

Supplement: supplementary_material [file ntk_f5.pdf › supplementary_plots/ntk_f5.pdf]

Baseline

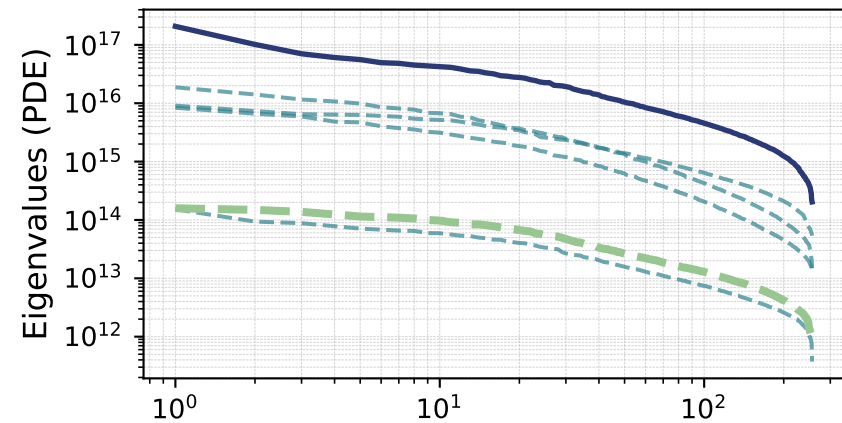

Glorot

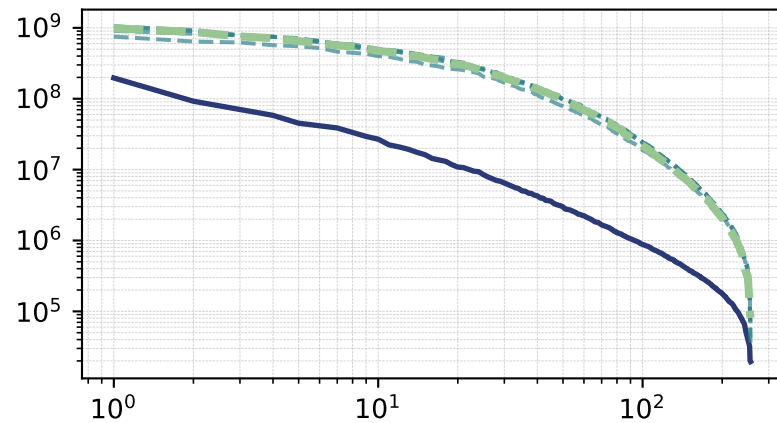

Power-Law

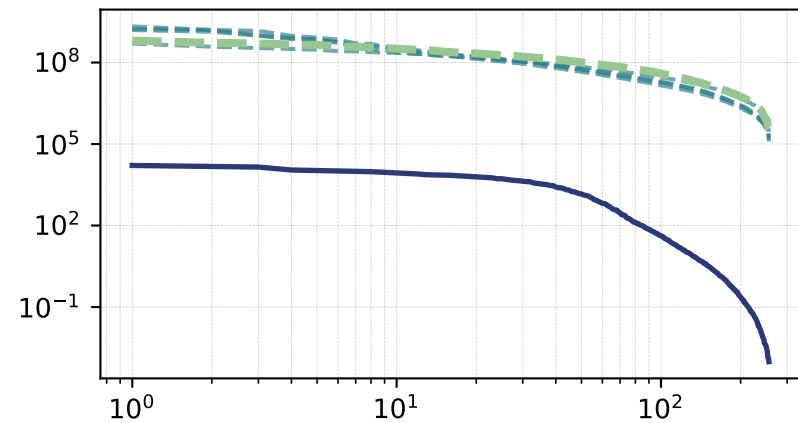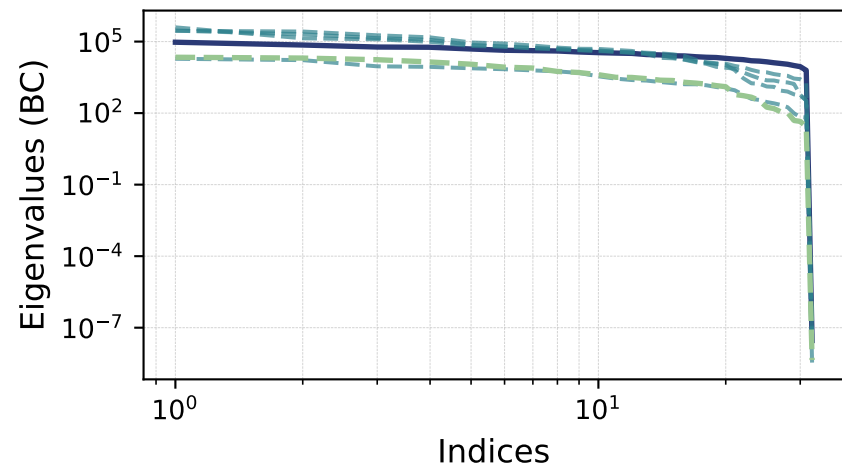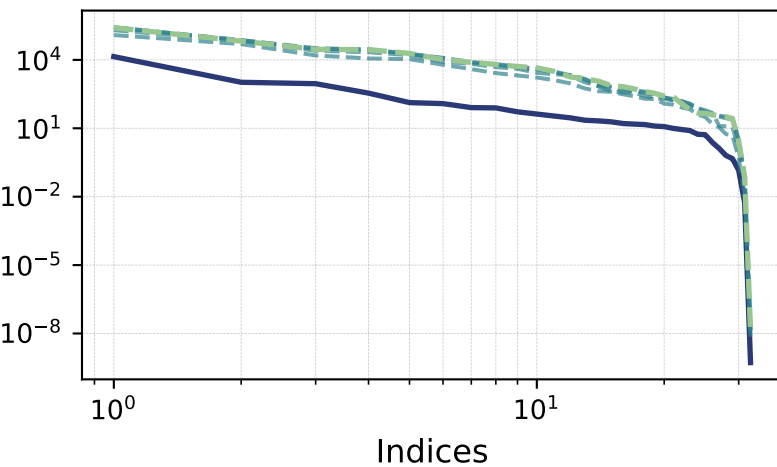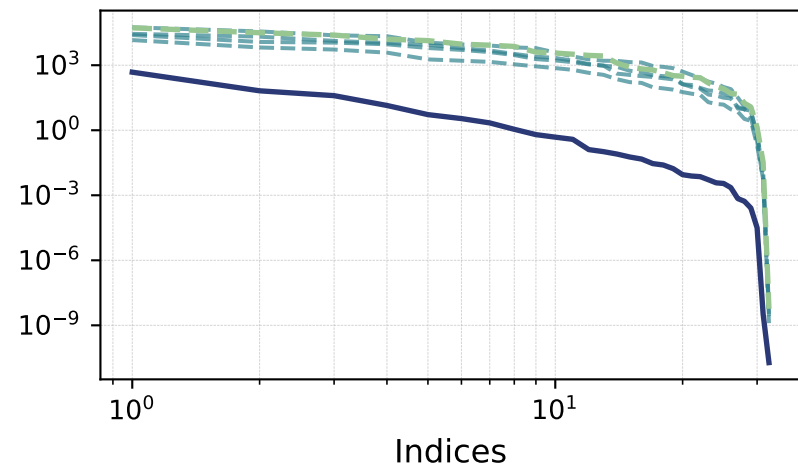

— Initialization    - - - Intermediate Iterations    - - - Final Iteration

Supplement: supplementary_material [file ntk_helmholtz.pdf › supplementary_plots/ntk_helmholtz.pdf]
